# Supplementary material for: Organocatalytic 1,4-conjugate addition of ascorbic acid to α,β-unsaturated aldehydes: bio-inspired total syntheses of leucodrin, leudrin and proposed structure of dilaspirolactone
Source: Royal Society of Chemistry journal article supplement (doi:10.1039/c3ob00046j), 2013-01-01
Supplement: c3ob00046j.pdf [file c3ob00046j.pdf]

## Supporting Information

### Organocatalytic 1,4-Conjugate Addition of Ascorbic Acid to Unsaturated Aldehydes: Bio-inspired Total Syntheses of Leucodrin, Leudrin and Proposed Structure of Dilaspirolactone

Zhaofeng Wang,<sup>a,b,§</sup> Kun Zhao,<sup>a,§</sup> Junkai Fu,<sup>b</sup> Junlin Zhang,<sup>b</sup> Weiyu Yin<sup>b</sup> and Yefeng Tang<sup>\*a,b</sup>

<sup>a</sup> The Comprehensive AIDS Research Center, Department of Pharmacology & Pharmaceutical Sciences, School of Medicine, Tsinghua University, Beijing 100084, China.

Fax: 86-10-62797732; Phone: 86-10-62784677; E-mail: yefengtang@tsinghua.edu.cn

<sup>b</sup> Laboratory of Chemical Genomics, School of Chemical Biology and Biotechnology, Peking University of Shenzhen Graduate School, Shenzhen, 518055, China

<sup>§</sup> These author contributed equally to this work.

### Table of Contents

|                                                                                                                                               |     |
|-----------------------------------------------------------------------------------------------------------------------------------------------|-----|
| Part 1: General Methods and Materials                                                                                                         | S2  |
| Part 2: Experimental details and characteristic data for organocatalytic addition of Ascorbic acid with $\alpha,\beta$ -unsaturated aldehydes | S3  |
| Part 3: Experimental details and characteristic data for selective oxidation of the hemiketal moiety.                                         | S7  |
| Part 4: Experimental details and characteristic data for syntheses of leucodrin, leudrin and proposed structure of diaspirolactone A.         | S11 |
| Part 5: NMR spectra                                                                                                                           | S15 |
| Part 6: X-ray Crystallographic Studies for <b>12j</b>                                                                                         | S49 |

## Part 1: General methods and materials:

Unless otherwise mentioned, all reactions were carried out under a nitrogen atmosphere under anhydrous conditions and all reagents were purchased from commercial suppliers without further purification. Solvent purification was conducted according to Purification of Laboratory Chemicals (Peerrin, D. D.; Armarego, W. L. and Perrins, D. R., Pergamon Press: Oxford, 1980). Yields refer to chromatographically and spectroscopically ( $^1\text{H}$  NMR) homogeneous materials.

Reactions were monitored by Thin Layer Chromatography on plates (GF254) supplied by Yantai Chemicals (China) using UV light as visualizing agent and an ethanolic solution of phosphomolybdic acid and cerium sulfate, and heat as developing agents. If not specially mentioned, flash column chromatography uses silica gel (200-300 mesh) supplied by Tsingtao Haiyang Chemicals (China).

NMR spectra were recorded on Bruker AV400 instrument. TMS was used as internal standard for  $^1\text{H}$  NMR (0 ppm), and solvent signal was used as reference for  $^{13}\text{C}$  NMR (CHLOROFORM-D, 77.160 ppm). The following abbreviations were used to explain the multiplicities: s = singlet, d = doublet, t = triplet, q = quartet, br = broad, td = triple doublet, qd = quarter doublet, m = multiplet.

Infrared (IR) spectra were recorded on a Thermo Nicolet Avatar 330 FT-IR spectrometer. High-resolution mass spectra (HRMS) were recorded on a Bruker ESI-Q/TOF MS.

## Part 2: Experimental details and characteristic data for organocatalytic addition of ascorbic acid with $\alpha$ , $\beta$ -unsaturated aldehydes

### General Procedure:

A mixture of **11** (1.5 mmol), **9** (1.0 mmol), and the catalyst C/BA (0.2 mmol) in 2.0 ml solvents ( $\text{H}_2\text{O}/\text{MeOH} = 1:4$ ) was stirred at  $50^\circ\text{C}$  for 12 h. The solvent was removed directly by concentration and the residual was purified by column chromatography (hexane/EtOAc = 1:2 to 1:5) to give the desired product **12** as a mixture of C-2 diastereoisomers which cannot be separated by chromatography. The ratios of  $\alpha$ -isomer/ $\beta$ -isomer vary from 1:5 to 1:7. Only the NMR data of  $\beta$ -isomer were documented in the following characteristic data of **12a-m**.

### Rationalization of the stereochemical result of the above transformation:

Notably, although four stereogenic centers were generated in this reaction, **12** was only obtained as a mixture of C-2 diastereoisomers, and no other diastereoisomers were observed. We think that the high diastereoselectivity of the reaction was mainly controlled by the substrate ascorbic acid itself (mainly the C-8 stereogenic center of ascorbic acid), but not the chiral catalyst. As shown below, when the electrophile approached to ascorbic acid, it should attack from the less hindered top side of the c ring. Meanwhile, the aromatic moiety was oriented far away from the c ring. It is the most favorable transition state compared with others, which may explain why we always got only one diastereoisomer with different catalysts. Moreover, we also tried the enantiomer of catalyst A (Cat. **D**) in the reaction, and it also gave comparable yield (86%) of **12a** with the same stereochemical outcome. This result further proved that the diastereoselectivity of the transformation is mainly controlled by the substrate, but not the catalyst.

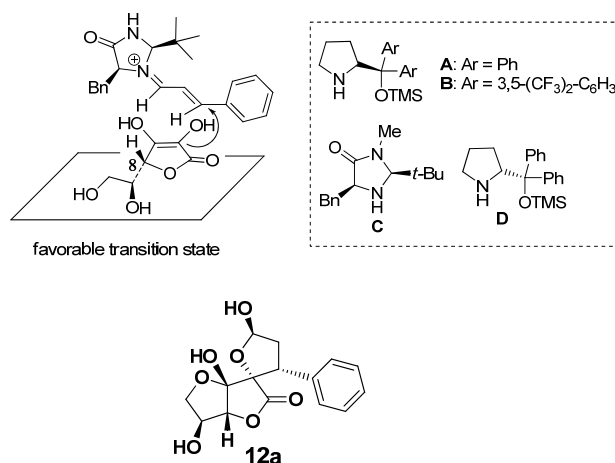

**Characteristic data of 12a:** IR  $\nu_{\text{max}}$  (film): 3448, 2954, 1785, 1113, 1017  $\text{cm}^{-1}$ ;  $[\alpha]_{\text{D}}^{20} = -29.0$  ( $c = 0.2$ ,  $\text{CHCl}_3$ );  $^1\text{H}$  NMR (300 MHz,  $\text{CD}_3\text{OD}$ ) (major isomer)  $\delta = 6.60$ - $6.55$  (m, 2H),  $6.53$ - $6.49$  (m, 3H),  $5.31$  (d,  $J = 4.3$  Hz, 1H),  $4.06$ - $3.97$  (m, 3H),  $3.85$  (d,  $J = 4.7$  Hz, 1H),  $3.68$  (s, 1H),  $2.88$  (ddd,  $J = 10.9, 10.3, 4.3$  Hz, 1H),  $2.37$  (dd,  $J = 10.1, 5.3$  Hz, 1H);  $^{13}\text{C}$  NMR (756 MHz,  $\text{CD}_3\text{OD}$ )  $\delta = 174.3, 134.2, 128.8, 128.5, 128.0, 106.0, 98.3, 91.3, 87.4, 74.9, 74.0, 46.7, 38.6$  ppm; HRMS (ESI)  $m/z$  calcd for  $\text{C}_{15}\text{H}_{16}\text{NaO}_7$   $[\text{M}+\text{Na}]^+$ : 331.0788; found: 331.0789.

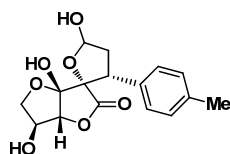

12b

**Characteristic data of 12b:** IR  $\nu_{\max}$  (film): 3435, 2954, 1785, 1109, 1022, 818  $\text{cm}^{-1}$ ;  $[\alpha]_{\text{D}}^{20} = -19.0$  ( $c = 0.2$ ,  $\text{CHCl}_3$ );  $^1\text{H}$  NMR (300 MHz,  $\text{CD}_3\text{OD}$ ) (major isomer)  $\delta = 7.27$  (d,  $J = 8.1$  Hz, 1H), 7.14 (d,  $J = 8.0$  Hz, 1H), 5.80 (d,  $J = 5.3$  Hz, 1H), 4.29 – 4.08 (m, 3H), 3.99 (dd,  $J = 8.4, 2.5$  Hz, 1H), 3.79 (s, 1H), 2.73 (ddd,  $J = 13.7, 12.7, 5.4$  Hz, 1H), 2.31 (s, 3H), 2.11 (dd,  $J = 12.6, 6.7$  Hz, 1H);  $^{13}\text{C}$  NMR (75 MHz,  $\text{CD}_3\text{OD}$ )  $\delta$  174.3, 137.9, 131.0, 129.1, 128.6, 106.0, 98.2, 91.3, 87.3, 74.9, 74.0, 46.3, 38.6, 19.9 ppm; HRMS (ESI)  $m/z$  calcd for  $\text{C}_{16}\text{H}_{18}\text{NaO}_7$   $[\text{M}+\text{Na}]^+$ : 345.0945; found: 345.0946.

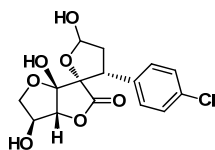

12c

**Characteristic data of 12c:** IR  $\nu_{\max}$  (film): 3464, 2967, 1797, 1092, 1009  $\text{cm}^{-1}$ ;  $[\alpha]_{\text{D}}^{20} = -35.0$  ( $c = 0.2$ ,  $\text{CHCl}_3$ );  $^1\text{H}$  NMR (300 MHz,  $\text{CD}_3\text{OD}$ ) (major isomer)  $\delta$  7.42 – 7.31 (m, 4H), 5.81 (d,  $J = 5.3$  Hz, 1H), 4.25 – 4.15 (m, 3H), 4.05 – 3.91 (m, 1H), 3.77 (s, 1H), 2.73 (ddd,  $J = 13.6, 12.7, 5.4$  Hz, 1H), 2.15 (dd,  $J = 12.6, 6.7$  Hz, 1H);  $^{13}\text{C}$  NMR (150 MHz,  $\text{CD}_3\text{OD}$ )  $\delta$  175.4, 135.3, 134.7, 131.8, 129.9, 107.3, 99.7, 92.6, 89.0, 76.2, 75.6, 47.6, 40.0 ppm; HRMS (ESI)  $m/z$  calcd for  $\text{C}_{15}\text{H}_{15}\text{ClNaO}_7$   $[\text{M}+\text{Na}]^+$ : 365.0398; found: 365.0440.

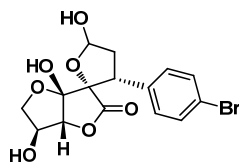

12d

**Characteristic data of 12d:** IR  $\nu_{\max}$  (film): 3460, 2967, 1789, 1071, 1022  $\text{cm}^{-1}$ ;  $[\alpha]_{\text{D}}^{20} = -12.0$  ( $c = 0.2$ ,  $\text{CHCl}_3$ );  $^1\text{H}$  NMR (300 MHz,  $\text{CD}_3\text{OD}$ ) (major isomer)  $\delta$  7.50 (d,  $J = 7.7$  Hz, 2H), 7.31 (d,  $J = 7.7$  Hz, 2H), 5.81 (d,  $J = 5.2$  Hz, 1H), 4.25 – 4.15 (m, 3H), 3.99 (dd,  $J = 8.7, 2.2$  Hz, 1H), 3.78 (s, 1H), 2.73 (td,  $J = 12.6, 4.7$  Hz, 1H), 2.14 (dd,  $J = 12.6, 6.6$  Hz, 1H);  $^{13}\text{C}$  NMR (125 MHz,  $\text{CD}_3\text{OD}$ )  $\delta$  175.5, 135.2, 133.0, 132.2, 123.3, 107.4, 99.7, 92.6, 89.0, 76.3, 75.6, 47.7, 40.0 ppm; HRMS (ESI)  $m/z$  calcd for  $\text{C}_{15}\text{H}_{15}\text{BrNaO}_7$   $[\text{M}+\text{Na}]^+$ : 408.9893; found: 408.9892.

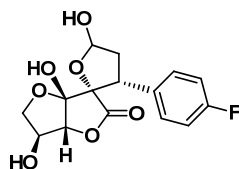

12e

**Characteristic data of 12e:** IR  $\nu_{\max}$  (film): 3456, 2958, 1785, 1515, 1009, 835  $\text{cm}^{-1}$ ;  $[\alpha]_{\text{D}}^{20} = -26.0$  ( $c = 0.2$ ,  $\text{CHCl}_3$ );  $^1\text{H}$  NMR (500 MHz,  $\text{CD}_3\text{OD}$ ) (major isomer)  $\delta$  7.46 – 7.36 (m, 2H), 7.12 – 7.01 (m, 2H), 5.81 (d,  $J = 5.3$  Hz, 1H), 4.27 – 4.09 (m, 3H), 4.03 – 3.95 (m, 1H), 3.78 (s, 1H), 2.73 (ddd,  $J = 13.6, 12.7, 5.4$  Hz, 1H), 2.14 (dd,  $J = 12.6, 6.7$  Hz, 1H);  $^{13}\text{C}$  NMR (125 MHz,

CD<sub>3</sub>OD)  $\delta$  175.5, 163.1, 132.1, 132.0, 116.6, 116.5, 107.4, 99.6, 88.9, 76.2, 75.5, 47.4, 40.1 ppm;  
HRMS (ESI)  $m/z$  calcd for C<sub>15</sub>H<sub>15</sub>FN<sub>3</sub>O<sub>7</sub> [M+Na]<sup>+</sup>: 349.0694; found:349.0693.

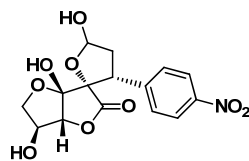

12f

**Characteristic data of 12f:** IR  $\nu_{\max}$  (film): 3377, 2917, 2357, 1789, 1519, 1349, 1076 cm<sup>-1</sup>;  
[ $\alpha$ ]<sub>D</sub><sup>20</sup> = -14.5 ( $c$  = 0.2, CHCl<sub>3</sub>); <sup>1</sup>H NMR (500 MHz, CD<sub>3</sub>OD)  $\delta$  8.20 (dd,  $J$  = 8.8, 1.9 Hz, 2H),  
7.76-7.58 (m, 2H), 5.84 (d,  $J$  = 5.3 Hz, 1H), 4.34 (dd,  $J$  = 13.1, 6.7 Hz, 1H), 4.23-4.09 (m, 3H),  
4.05-3.90 (m, 1H), 3.76 (s, 1H), 2.97-2.69 (m, 1H), 2.20 (dd,  $J$  = 13.1, 7.3 Hz, 1H); <sup>13</sup>C NMR  
(75 MHz, CD<sub>3</sub>OD)  $\delta$  175.1, 149.4, 144.0, 131.5, 124.8, 107.3, 99.9, 92.7, 89.2, 76.3, 75.6, 48.1,  
40.1 ppm; HRMS (ESI)  $m/z$  calcd for C<sub>15</sub>H<sub>15</sub>NNaO<sub>9</sub> [M+Na]<sup>+</sup>: 376.0639; found:376.0642.

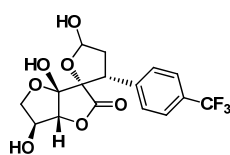

12g

**Characteristic data of 12g:** IR  $\nu_{\max}$  (film): 3427, 1789, 1324, 1113, 1071, 1009 cm<sup>-1</sup>; [ $\alpha$ ]<sub>D</sub><sup>20</sup> =  
-24.5 ( $c$  = 0.2, CHCl<sub>3</sub>); <sup>1</sup>H NMR (300 MHz, CD<sub>3</sub>OD)  $\delta$  7.70-7.55 (m, 4H), 5.84 (d,  $J$  = 5.3 Hz,  
1H), 4.31 (dd,  $J$  = 13.5, 6.6 Hz, 1H), 4.24-4.13 (m, 2H), 4.00 (dd,  $J$  = 7.8, 2.1 Hz, 1H), 3.76 (s,  
1H), 2.87-2.72 (m, 1H), 2.20 (dd,  $J$  = 12.6, 6.8 Hz, 1H); <sup>13</sup>C NMR (75 MHz, CD<sub>3</sub>OD)  $\delta$  175.3,  
140.8, 131.1, 131.0, 126.7, 126.7, 107.4, 99.8, 92.7, 89.1, 76.3, 75.6, 48.1, 40.0 ppm; HRMS (ESI)  
 $m/z$  calcd for C<sub>16</sub>H<sub>19</sub>F<sub>3</sub>NaO<sub>7</sub> [M+Na]<sup>+</sup>: 394.1108; found:394.1106.

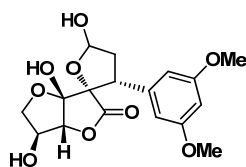

12h

**Characteristic data of 12h:** IR  $\nu_{\max}$  (film): 3448, 2921, 1781, 1586, 1204, 1059, 1022 cm<sup>-1</sup>;  
[ $\alpha$ ]<sub>D</sub><sup>20</sup> = -68.0 ( $c$  = 0.2, CHCl<sub>3</sub>); <sup>1</sup>H NMR (300 MHz, CD<sub>3</sub>OD)  $\delta$  6.55 (d,  $J$  = 2.2 Hz, 2H), 6.43 (s,  
1H), 5.79 (d,  $J$  = 5.3 Hz, 1H), 4.23-4.07 (m, 3H), 4.00 (dd,  $J$  = 8.9, 3.1 Hz, 1H), 3.91 (s, 1H),  
3.76 (s, 6H), 2.70 (td,  $J$  = 13.2, 5.4 Hz, 1H), 2.13 (dd,  $J$  = 12.6, 6.7 Hz, 1H); <sup>13</sup>C NMR (75 MHz,  
CD<sub>3</sub>OD)  $\delta$  175.9, 162.5, 137.9, 108.2, 107.5, 101.2, 99.7, 92.6, 89.1, 76.3, 75.5, 55.9, 55.9, 48.3,  
40.1 ppm; HRMS (ESI)  $m/z$  calcd for C<sub>17</sub>H<sub>20</sub>NaO<sub>9</sub> [M+Na]<sup>+</sup>: 391.0999; found:391.0999;

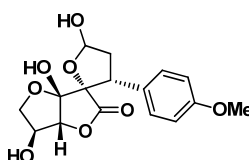

12i

**Characteristic data of 12i:** IR  $\nu_{\max}$  (film): 3435, 2958, 2357, 1785, 1511, 1022, 831 cm<sup>-1</sup>;  
[ $\alpha$ ]<sub>D</sub><sup>20</sup> = -26.5 ( $c$  = 0.2, CHCl<sub>3</sub>); <sup>1</sup>H NMR (300 MHz, METHANOL-D<sub>3</sub>)  $\delta$  7.31 (d,  $J$  = 8.6 Hz, 2H),  
6.89 (d,  $J$  = 8.7 Hz, 2H), 5.78 (d,  $J$  = 5.3 Hz, 1H), 4.24-4.08 (m, 3H), 4.02-3.93 (m, 1H), 3.80-  
3.75 (m, 4H), 2.78-2.66 (m, 1H), 2.10 (dd,  $J$  = 12.6, 6.7 Hz, 1H); <sup>13</sup>C NMR (150 MHz, CD<sub>3</sub>OD)

$\delta$  175.9, 161.2, 131.2, 127.2, 115.2, 107.5, 99.6, 92.6, 88.8, 76.3, 75.6, 55.9, 47.4, 40.1 ppm;  
HRMS (ESI)  $m/z$  calcd for  $C_{16}H_{18}NaO_8$   $[M+Na]^+$ : 361.0894; found:361.0893.

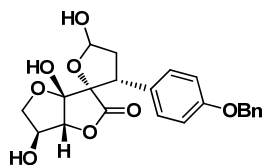

12j

**Characteristic data of 12j:** IR  $\nu_{max}$  (film): 3440, 2958, 2353, 1789, 1511, 1246, 1022  $cm^{-1}$ ;  
 $[\alpha]_D^{20} = -15.5$  ( $c = 0.2$ ,  $CHCl_3$ );  $^1H$  NMR (500 MHz,  $CD_3OD$ )  $\delta$  7.45 – 7.25 (m, 7H), 6.94 (d,  $J = 8.8$  Hz, 2H), 5.79 (d,  $J = 5.3$  Hz, 1H), 5.02 (s, 2H), 4.26 – 4.11 (m, 3H), 3.99 (dd,  $J = 9.4, 3.6$  Hz, 1H), 3.82 (s, 1H), 2.81 – 2.64 (m, 1H), 2.10 (dd,  $J = 12.6, 6.7$  Hz, 1H).;  $^{13}C$  NMR (125 MHz,  $CD_3OD$ )  $\delta$  175.8, 160.3, 138.7, 131.3, 129.6, 129.0, 128.7, 127.5, 116.2, 107.5, 99.6, 92.6, 88.8, 76.2, 75.6, 71.2, 47.4, 40.0 ppm; HRMS (ESI)  $m/z$  calcd for  $C_{22}H_{22}NaO_8$   $[M+Na]^+$ : 437.1207; found:437.1209.

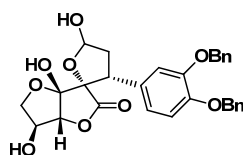

12k

**Characteristic data of 12k:**  $R_f = 0.65$  (silica gel,  $CH_2Cl_2/MeOH = 10/1$ );  $[\alpha]_D^{20} = -6$  ( $c = 0.2$ ,  $CHCl_3$ ); IR  $\nu_{max}$  (film): 3647, 2984, 2897, 1408, 1259, 1064, 815, 736  $cm^{-1}$ ;  $^1H$  NMR (400 MHz,  $CDCl_3$ )  $\delta = 7.49 - 7.20$  (m, 10H), 6.96 (s, 1H), 6.89 (s, 2H), 5.17 – 5.07 (m, 4H), 4.27 (d,  $J = 4.0$  Hz, 1H), 4.19 – 4.12 (m, 2H), 4.03 (dd,  $J = 10.5, 4.3$  Hz, 1H), 3.77 (s, 1H), 3.09 (dd,  $J = 17.4, 13.2$  Hz, 1H), 2.83 (dd,  $J = 17.4, 8.4$  Hz, 1H).;  $^{13}C$  NMR (100 MHz,  $CDCl_3$ )  $\delta = 174.0, 170.7, 149.4, 148.8, 136.8, 136.7, 128.5, 128.5, 128.0, 127.9, 127.4, 127.3, 124.3, 121.9, 115.4, 114.9, 105.4, 88.9, 86.0, 85.9, 76.1, 73.3, 71.4, 71.1, 45.0, 33.8$  ppm; HRMS  $m/z$  calcd for  $C_{29}H_{26}O_9$   $[M+Na]^+$ : 541.1469.; found: 541.1470.

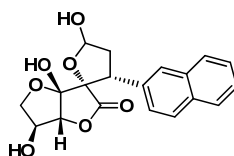

12l

**Characteristic data of 12l:** IR  $\nu_{max}$  (film): 3435, 2958, 1789, 1337, 1117, 1013, 823, 748, 731  $cm^{-1}$ ;  $[\alpha]_D^{20} = -31.5$  ( $c = 0.2$ ,  $CHCl_3$ );  $^1H$  NMR (300 MHz,  $CD_3OD$ )  $\delta$  8.18 – 7.72 (m, 4H), 7.56 – 7.37 (m, 3H), 5.87 (d,  $J = 5.3$  Hz, 1H), 4.39 (dd,  $J = 13.7, 6.6$  Hz, 1H), 4.25 – 4.11 (m, 2H), 4.02 – 3.97 (m, 1H), 3.75 (s, 1H), 2.91 (ddd,  $J = 13.6, 12.7, 5.4$  Hz, 1H), 2.23 (dd,  $J = 12.6, 6.7$  Hz, 1H).;  $^{13}C$  NMR (75 MHz,  $CD_3OD$ )  $\delta$  175.8, 134.9, 134.8, 133.2, 129.5, 129.4, 129.1, 128.8, 127.7, 127.5, 127.4, 107.4, 99.8, 92.8, 88.9, 76.3, 75.5, 48.3, 40.1 ppm; HRMS (ESI)  $m/z$  calcd for  $C_{19}H_{22}NO_7$   $[M+NH_4]^+$ : 376.1391; found:376.1391.

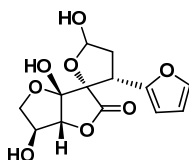

12m

**Characteristic data of 12m:** IR  $\nu_{\max}$  (film): 3427, 2357, 1785, 1113, 1013, 740  $\text{cm}^{-1}$ ;  $[\alpha]_{\text{D}}^{20} = +2.5$  ( $c = 0.2$ ,  $\text{CHCl}_3$ );  $^1\text{H}$  NMR (500 MHz,  $\text{CD}_3\text{OD}$ )  $\delta$  7.45 (dd,  $J = 1.8, 0.8$  Hz, 1H), 6.68 – 6.25 (m, 2H), 5.77 (d,  $J = 5.2$  Hz, 1H), 4.41 – 4.25 (m, 2H), 4.23 – 4.17 (m, 2H), 4.07 – 3.98 (m, 1H), 2.69 (td,  $J = 12.9, 5.3$  Hz, 1H), 2.17 (dd,  $J = 12.6, 6.9$  Hz, 1H).;  $^{13}\text{C}$  NMR (75 MHz,  $\text{CD}_3\text{OD}$ )  $\delta$  175.3, 150.9, 144.1, 111.8, 109.9, 109.7, 107.5, 99.7, 89.1, 76.6, 75.5, 42.4, 38.8 ppm; HRMS (ESI)  $m/z$  calcd for  $\text{C}_{13}\text{H}_{14}\text{NaO}_8$   $[\text{M}+\text{NH}_4]^+$ : 321.0581; found: 321.0581.

### Part 3: Experimental details and characteristic data for selective oxidation of the hemiketal moiety

#### General Procedure:

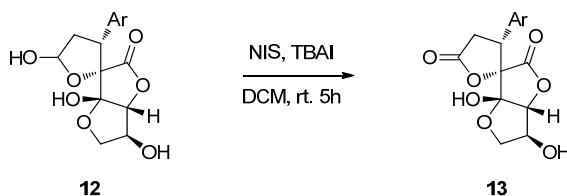

**Synthesis of 13:** A mixture of **12** (1.0 mmol), N-iodosuccinimide (5.0 mmol), and tetrabutylammonium iodide (1.0 mmol) in 5.0 ml DCM was stirred at 50°C for 5 h. Then 10 mL water was added followed by 10 ml DCM. The organic layer was separated and aqueous phase was extracted with DCM twice. The combined extract was washed with 10 ml  $\text{H}_2\text{O}$  and brine, and then dried with  $\text{Na}_2\text{SO}_4$  and evaporated to dryness. The residue was purified by column chromatography (hexane/EtOAc = 5:1) to give the desired product **13a-l**.

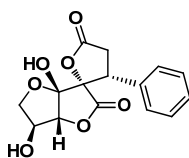

13a

**Characteristic data of 13a:** IR  $\nu_{\max}$  (film): 3456, 2888, 2900, 1801, 1710, 1217, 1117, 1071, 1030, 777  $\text{cm}^{-1}$ ;  $[\alpha]_{\text{D}}^{20} = -7.0$  ( $c = 0.2$ ,  $\text{CHCl}_3$ );  $^1\text{H}$  NMR (300 MHz,  $\text{CD}_3\text{OD}$ )  $\delta$  7.45 – 7.40 (m, 2H), 7.39 – 7.33 (m, 3H), 4.30 (dd,  $J = 12.9, 8.6$  Hz, 1H), 4.25 – 4.15 (m, 2H), 4.04 – 3.98 (m, 1H), 3.81 (s, 1H), 3.26 – 3.18 (m, 1H), 2.92 (dd,  $J = 17.4, 8.6$  Hz, 1H);  $^{13}\text{C}$  NMR (75 MHz,  $\text{CD}_3\text{OD}$ )  $\delta$  159.4, 157.1, 126.1, 123.0, 122.9, 122.1, 104.2, 91.7, 90.5, 80.2, 79.0, 56.4, 46.4 ppm; HRMS (ESI)  $m/z$  calcd for  $\text{C}_{15}\text{H}_{15}\text{O}_7$   $[\text{M}+\text{H}]^+$ : 307.0812; found: 307.0814.

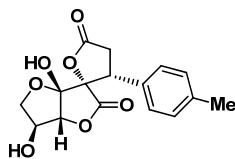

13b

**Characteristic data of 13b:** IR  $\nu_{\max}$  (film): 3469, 2971, 2921, 1805, 1208, 1121, 1034, 901  $\text{cm}^{-1}$ ;  $[\alpha]_{\text{D}}^{20} = -5.0$  ( $c = 0.2$ ,  $\text{CHCl}_3$ );  $^1\text{H}$  NMR (300 MHz,  $\text{CD}_3\text{OD}$ )  $\delta$  7.27 (d,  $J = 8.2$  Hz, 2H), 7.17

(d,  $J = 8.1$  Hz, 2H), 4.38 (d,  $J = 4.0$  Hz, 1H), 4.33 – 4.19 (m, 2H), 4.12 (dd,  $J = 10.6, 4.3$  Hz, 1H), 3.90 (s, 1H), 3.25 (dd,  $J = 17.4, 13.3$  Hz, 1H), 2.90 (dd,  $J = 17.4, 8.4$  Hz, 1H);  $^{13}\text{C}$  NMR (75 MHz,  $\text{CD}_3\text{OD}$ )  $\delta$  174.0, 170.6, 139.5, 130.2, 128.7, 128.7, 124.6, 105.9, 89.2, 86.0, 73.8, 45.4, 34.0, 21.4 ppm; HRMS (ESI)  $m/z$  calcd for  $\text{C}_{16}\text{H}_{17}\text{O}_7$   $[\text{M}+\text{H}]^+$ : 321.0969; found: 321.0972.

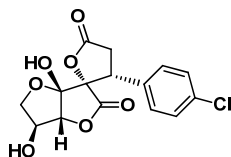

13c

**Characteristic data of 13c:** IR  $\nu_{\text{max}}$  (film): 3477, 2975, 2896, 1801, 1212, 1121, 1026, 897  $\text{cm}^{-1}$ ;  $[\alpha]_{\text{D}}^{20} = -36$  ( $c = 0.2$ ,  $\text{CHCl}_3$ );  $^1\text{H}$  NMR (300 MHz,  $\text{CD}_3\text{OD}$ )  $\delta$  7.44 – 7.36 (m, 4H), 4.34 – 4.17 (m, 3H), 4.01 (dd,  $J = 12.4, 3.3$  Hz, 1H), 3.84 (s, 1H), 3.22 (dd,  $J = 17.4, 12.8$  Hz, 1H), 2.93 (dd,  $J = 17.4, 8.6$  Hz, 1H);  $^{13}\text{C}$  NMR (75 MHz,  $\text{CD}_3\text{OD}$ )  $\delta$  175.5, 172.6, 136.0, 133.1, 131.8, 130.3, 106.7, 90.8, 89.8, 76.7, 75.2, 46.3, 34.4 ppm; HRMS (ESI)  $m/z$  calcd for  $\text{C}_{15}\text{H}_{14}\text{ClO}_7$   $[\text{M}+\text{H}]^+$ : 341.0423; found: 341.0426.

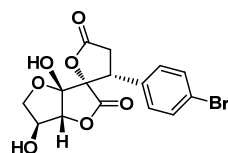

13d

**Characteristic data of 13d:** IR  $\nu_{\text{max}}$  (film): 3402, 2892, 2336, 1801, 1706, 1208, 1117, 1030, 827  $\text{cm}^{-1}$ ;  $[\alpha]_{\text{D}}^{20} = -5.5$  ( $c = 0.2$ ,  $\text{CHCl}_3$ );  $^1\text{H}$  NMR (300 MHz,  $\text{CD}_3\text{OD}$ )  $\delta$  7.47 (dd,  $J = 8.1, 1.7$  Hz, 2H), 7.38 (dd,  $J = 8.4, 1.5$  Hz, 2H), 4.33 – 4.17 (m, 3H), 4.02 (dd,  $J = 9.4, 3.3$  Hz, 1H), 3.84 (s, 1H), 3.20 (dd,  $J = 17.3, 12.8$  Hz, 1H), 2.92 (dd,  $J = 17.3, 8.5$  Hz, 1H);  $^{13}\text{C}$  NMR (75 MHz,  $\text{CD}_3\text{OD}$ )  $\delta$  175.5, 172.6, 133.5, 133.3, 132.0, 124.0, 106.7, 90.7, 89.8, 76.7, 75.2, 46.4, 34.3 ppm; HRMS (ESI)  $m/z$  calcd for  $\text{C}_{15}\text{H}_{14}\text{BrO}_7$   $[\text{M}+\text{H}]^+$ : 384.9917; found: 384.9914.

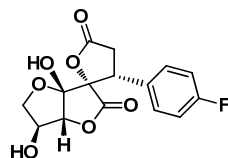

13e

**Characteristic data of 13e:** IR  $\nu_{\text{max}}$  (film): 3448, 2988, 1801, 1511, 1225, 1121, 1076, 1030, 843  $\text{cm}^{-1}$ ;  $[\alpha]_{\text{D}}^{20} = -11.0$  ( $c = 0.2$ ,  $\text{CHCl}_3$ );  $^1\text{H}$  NMR (300 MHz,  $\text{CD}_3\text{OD}$ )  $\delta$  7.47 (dd,  $J = 9.2, 5.3$  Hz, 2H), 7.13 (t,  $J = 8.9$  Hz, 2H), 4.48 – 4.15 (m, 2H), 4.04 (dd,  $J = 9.3, 3.3$  Hz, 1H), 3.84 (s, 1H), 3.24 (dd,  $J = 17.4, 12.8$  Hz, 1H), 2.95 (dd,  $J = 17.5, 8.6$  Hz, 1H);  $^{13}\text{C}$  NMR (75 MHz,  $\text{CD}_3\text{OD}$ )  $\delta$  173.5, 170.8, 130.2, 130.1, 128.2, 115.1, 114.8, 104.7, 87.8, 74.7, 73.2, 44.2, 32.6 ppm; HRMS (ESI)  $m/z$  calcd for  $\text{C}_{15}\text{H}_{14}\text{FO}_7$   $[\text{M}+\text{H}]^+$ : 325.0718; found: 325.0721.

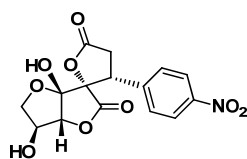

13f

**Characteristic data of 13f:** IR  $\nu_{\text{max}}$  (film): 3464, 2992, 1793, 1723, 1345, 1084, 860  $\text{cm}^{-1}$ ;



$[\alpha]_D^{20} = -5.5$  ( $c = 0.2$ ,  $\text{CHCl}_3$ );  $^1\text{H NMR}$  (300 MHz,  $\text{CD}_3\text{OD}$ )  $\delta$  8.16 (dd,  $J = 9.1, 1.3$  Hz, 2H), 7.60 (d,  $J = 9.2$  Hz, 2H), 4.24 – 4.19 (m, 1H), 4.17 – 4.06 (m, 1H), 4.02 – 3.85 (m, 2H), 3.55 – 3.44 (m, 1H), 3.35 (s, 1H), 2.93 – 2.77 (m, 1H);  $^{13}\text{C NMR}$  (75 MHz,  $\text{CD}_3\text{OD}$ )  $\delta$  176.4, 174.4, 147.1, 131.5, 125.1, 124.1, 108.6, 88.1, 81.5, 75.9, 75.6, 47.0, 35.9 ppm.; HRMS (ESI)  $m/z$  calcd for  $\text{C}_{15}\text{H}_{14}\text{NO}_9$   $[\text{M}+\text{H}]^+$ : 352.0663; found: 352.0667.

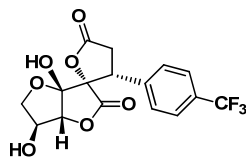

13g

**Characteristic data of 13g:** IR  $\nu_{\text{max}}$  (film): 3440, 1785, 1714, 1324, 1118, 1063, 1017, 835  $\text{cm}^{-1}$ ;  $[\alpha]_D^{20} = -7.5$  ( $c = 0.2$ ,  $\text{CHCl}_3$ );  $^1\text{H NMR}$  (300 MHz,  $\text{CD}_3\text{OD}$ )  $\delta$  7.64 (q,  $J = 8.5$  Hz, 4H), 4.40 (dd,  $J = 12.5, 8.6$  Hz, 1H), 4.28 – 4.10 (m, 2H), 4.01 (dd,  $J = 9.3, 3.2$  Hz, 1H), 3.81 (s, 1H), 3.29 – 3.15 (m, 1H), 2.97 (dd,  $J = 17.5, 8.6$  Hz, 0H).;  $^{13}\text{C NMR}$  (75 MHz,  $\text{CD}_3\text{OD}$ )  $\delta$  175.3, 172.5, 139.0, 139.0, 131.9, 131.0, 127.0, 127.0, 106.7, 89.8, 76.7, 75.2, 46.6, 34.4 ppm; HRMS (ESI)  $m/z$  calcd for  $\text{C}_{16}\text{H}_{14}\text{F}_3\text{O}_7$   $[\text{M}+\text{H}]^+$ : 375.0686; found: 375.0687.

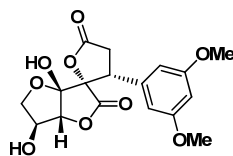

13h

**Characteristic data of 13h:** IR  $\nu_{\text{max}}$  (film): 3452, 2361, 1793, 1727, 1594, 1208, 1154, 1067  $\text{cm}^{-1}$ ;  $[\alpha]_D^{20} = -20.5$  ( $c = 0.2$ ,  $\text{CHCl}_3$ );  $^1\text{H NMR}$  (300 MHz,  $\text{CD}_3\text{OD}$ )  $\delta$  6.58 (d,  $J = 2.2$  Hz, 2H), 6.47 (t,  $J = 2.2$  Hz, 1H), 4.31 – 4.17 (m, 3H), 4.04 (dd,  $J = 9.4, 3.3$  Hz, 1H), 3.97 (s, 1H), 3.22 (dd,  $J = 17.4, 12.9$  Hz, 1H), 2.92 (dd,  $J = 17.4, 8.6$  Hz, 1H).;  $^{13}\text{C NMR}$  (75 MHz,  $\text{CD}_3\text{OD}$ )  $\delta$  150.4, 148.2, 140.1, 118.9, 96.3, 95.3, 91.2, 82.6, 81.7, 71.2, 70.0, 54.6, 47.5, 37.5 ppm; HRMS (ESI)  $m/z$  calcd for  $\text{C}_{17}\text{H}_{19}\text{O}_9$   $[\text{M}+\text{H}]^+$ : 367.1024; found: 367.1024.

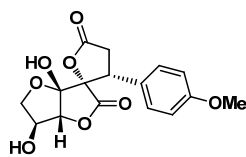

13i

**Characteristic data of 13i:** IR  $\nu_{\text{max}}$  (film): 3464, 2967, 2361, 1801, 1611, 1511, 1254, 1067, 1030  $\text{cm}^{-1}$ ;  $[\alpha]_D^{20} = -22.0$  ( $c = 0.2$ ,  $\text{CHCl}_3$ );  $^1\text{H NMR}$  (300 MHz,  $\text{CD}_3\text{OD}$ )  $\delta$  7.32 (d,  $J = 8.8$  Hz, 2H), 6.90 (d,  $J = 8.8$  Hz, 2H), 4.39 (d,  $J = 3.6$  Hz, 1H), 4.29 (dd,  $J = 13.3, 8.4$  Hz, 1H), 4.22 (dd,  $J = 10.4, 1.5$  Hz, 1H), 4.13 (dd,  $J = 10.4, 4.4$  Hz, 1H), 3.93 (s, 1H), 3.80 (s, 3H), 3.22 (dd,  $J = 17.4, 13.3$  Hz, 1H), 2.92 (dd,  $J = 17.4, 8.4$  Hz, 1H);  $^{13}\text{C NMR}$  (75 MHz,  $\text{CD}_3\text{OD}$ )  $\delta$  174.43, 171.0, 160.3, 130.0, 123.4, 114.9, 105.8, 100.1, 89.3, 86.3, 73.7, 55.5, 34.0, 29.9 ppm; HRMS (ESI)  $m/z$  calcd for  $\text{C}_{16}\text{H}_{17}\text{O}_8$   $[\text{M}+\text{H}]^+$ : 337.0918; found: 337.0921.

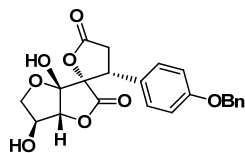

13j

**Characteristic data of 13j:** IR  $\nu_{\max}$  (film): 3286, 2925, 2357, 1801, 1698, 1183, 1121, 1030, 823  $\text{cm}^{-1}$ ;  $[\alpha]_{\text{D}}^{20} = -9.5$  ( $c = 0.2$ ,  $\text{CHCl}_3$ );  $^1\text{H}$  NMR (300 MHz,  $\text{CD}_3\text{OD}$ )  $\delta$  7.42 – 7.28 (m, 7H), 7.98 (dd,  $J = 8.7, 1.8$  Hz, 1H), 5.50 (s, 2H), 4.23 – 4.17 (m, 2H), 4.33 – 4.09 (m, 3H), 3.84 (s, 1H), 3.19 (dd,  $J = 17.6, 12.5$  Hz, 1H), 2.87 (dd,  $J = 17.6, 8.5$  Hz, 1H);  $^{13}\text{C}$  NMR (150 MHz,  $\text{CD}_3\text{OD}$ )  $\delta$  175.8, 172.9, 160.7, 138.6, 131.2, 129.7, 129.1, 128.8, 125.9, 116.5, 106.7, 91.0, 89.6, 76.7, 75.2, 71.2, 46.3, 34.6 ppm; HRMS (ESI)  $m/z$  calcd for  $\text{C}_{22}\text{H}_{21}\text{O}_8$   $[\text{M}+\text{H}]^+$ : 413.1231; found: 413.1231.

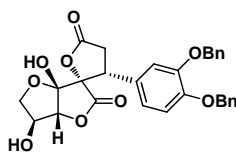

13k

**Characteristic data of 13k:**  $R_f = 0.65$  (silica gel,  $\text{CH}_2\text{Cl}_2/\text{MeOH} = 10/1$ ); IR  $\nu_{\max}$  (film): 2969, 1793, 1518, 1273, 1024, 823, 736  $\text{cm}^{-1}$ ;  $[\alpha]_{\text{D}}^{20} = -29.0$  ( $c = 0.2$ ,  $\text{CHCl}_3$ );  $^1\text{H}$  NMR (400 MHz,  $\text{CD}_3\text{OD}$ )  $\delta$  = 7.49 – 7.20 (m, 10H), 6.96 (s, 1H), 6.89 (s, 2H), 5.17 – 5.07 (m, 4H), 4.27 (d,  $J = 4.0$  Hz, 1H), 4.19 – 4.12 (m, 2H), 4.03 (dd,  $J = 10.5, 4.3$  Hz, 1H), 3.77 (s, 1H), 3.09 (dd,  $J = 17.4, 13.2$  Hz, 1H), 2.83 (dd,  $J = 17.4, 8.4$  Hz, 1H);  $^{13}\text{C}$  NMR (100 MHz,  $\text{CD}_3\text{OD}$ )  $\delta$  = 174.0, 170.7, 149.4, 148.8, 136.8, 136.7, 128.5, 128.5, 128.0, 127.9, 127.4, 127.3, 124.3, 121.9, 115.4, 114.9, 105.4, 88.9, 86.0, 85.9, 76.1, 73.3, 71.4, 71.1, 45.0, 33.8 ppm; HRMS  $m/z$  calcd for  $\text{C}_{29}\text{H}_{26}\text{O}_9$   $[\text{M}+\text{Na}]^+$ : 541.1469; found: 541.1470.

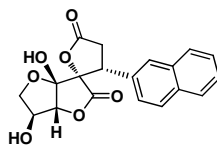

13l

**Characteristic data of 13l:** IR  $\nu_{\max}$  (film): 3452, 2349, 1797, 1718, 1208, 1117, 1080, 1026, 823, 752  $\text{cm}^{-1}$ ;  $[\alpha]_{\text{D}}^{20} = -21.0$  ( $c = 0.2$ ,  $\text{CHCl}_3$ );  $^1\text{H}$  NMR (301 MHz,  $\text{CD}_3\text{OD}$ )  $\delta$  7.97 – 7.74 (m, 4H), 7.61 – 7.43 (m, 3H), 4.50 (dd,  $J = 12.8, 8.6$  Hz, 1H), 4.23 – 4.17 (m, 2H), 4.10 – 3.98 (m, 1H), 3.82 (s, 1H), 3.41 (dd,  $J = 17.4, 12.8$  Hz, 1H), 3.01 (dd,  $J = 17.4, 8.6$  Hz, 1H);  $^{13}\text{C}$  NMR (75 MHz,  $\text{CD}_3\text{OD}$ )  $\delta$  175.8, 172.9, 135.0, 134.8, 131.5, 130.0, 129.6, 129.2, 128.8, 127.9, 127.8, 127.2, 106.8, 91.1, 89.7, 76.7, 75.1, 47.1, 34.6 ppm; HRMS (ESI)  $m/z$  calcd for  $\text{C}_{19}\text{H}_{17}\text{O}_7$   $[\text{M}+\text{H}]^+$ : 357.0969; found: 357.0969.

#### Part 4: Experimental details and characteristic data for syntheses of leucodrin, leudrin and proposed structure of diaspirolactone A.

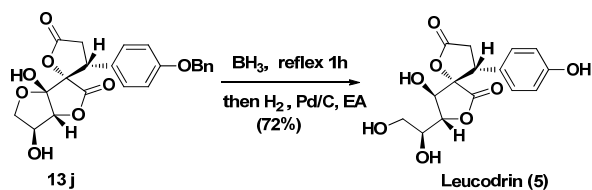

**Synthesis of leucodrin (5):** To a solution of **13j** (165 g, 0.4 mmol) in anhydrous THF (5 mL) was added  $\text{BH}_3$  (1.0 M in THF, 0.8 mmol, 0.8 mL). The solution was heated to reflux and was stirred for 1 h. The reaction was quenched with water and extracted with EtOAc (3 x 30 mL). The combined organic layers were washed with brine, dried over  $\text{Na}_2\text{SO}_4$  and concentrated *in vacuo* to give a white solid that was used immediately in the next step without further purification.

To a solution of the above crude product in EtOAc/THF (5 mL, v/v 1:1) at room temperature was added 10% Pd/C (30mg). The solution was stirred under hydrogen atmosphere for 4 h and then filtered. The filtrate was concentrated *in vacuo*, and the residue was purified with flash column chromatography (silica gel, DCM/MeOH = 10:1) to afford Leucodrin (**5**) as a white solid (93 mg, 72% for 2 steps).

**Characteristic data of leucodrin (5):**  $R_f = 0.46$  (silica gel,  $\text{CH}_2\text{Cl}_2/\text{MeOH} = 10/1$ );  $[\alpha]_D^{20} = -11.9$  ( $c = 1.0$ , 95% EtOH), (lit.  $[\alpha]_D^{20} = -11.2$ , ( $c=1.0$ , 95%EtOH)); IR  $\nu_{\text{max}}$  (film): 3382, 1781, 16007, 1511, 1167, 1109, 1022, 835, 765, 678  $\text{cm}^{-1}$ ;  $^1\text{H}$  NMR (400 MHz,  $\text{DMSO-d}_6$ )  $\delta$  9.49 (s, 1H), 7.18 (d,  $J = 8.2$  Hz, 2H), 6.71 (d,  $J = 8.1$  Hz, 2H), 6.59 (d,  $J = 5.1$  Hz, 1H), 5.16 (d,  $J = 6.3$  Hz, 1H), 4.73 – 4.60 (m, 2H), 4.29 (dd,  $J = 12.5, 8.8$  Hz, 1H), 3.70 (dd,  $J = 8.5, 1.7$  Hz, 1H), 3.54-3.49 (m, 1H), 3.22 – 3.06 (m, 2H), 2.92 (dd,  $J = 17.4, 8.8$  Hz, 1H);  $^{13}\text{C}$  NMR (100 MHz,  $\text{DMSO-d}_6$ )  $\delta = 174.6, 171.9, 157.1, 129.9, 123.4, 115.4, 89.9, 79.8, 69.1, 67.9, 61.2, 41.0, 33.1$  ppm; HRMS  $m/z$  calcd for  $\text{C}_{15}\text{H}_{16}\text{O}_8$   $[\text{M}+\text{Na}]^+$ : 347.0737; found: 347.0741.

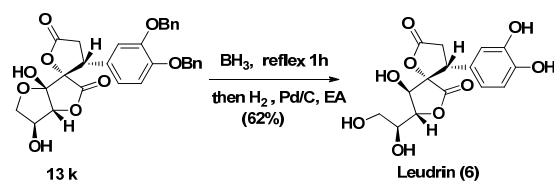

**Synthesis of leudrin (6):** The same procedure was employed as that for the synthesis of **5**, with leudrin (**6**) obtained in yield of 61.2%.

**Characteristic data of leucodrin (5):**  $R_f = 0.35$  (silica gel,  $\text{CH}_2\text{Cl}_2/\text{MeOH} = 10/1$ );  $[\alpha]_D^{20} = -13.0$ , ( $c = 0.25$ , 95%EtOH), (lit.  $[\alpha]_D^{20} = -16.7$ , ( $c=0.88$ , 95%EtOH)); IR  $\nu_{\text{max}}$  (film): 3386, 2917, 1794, 1259, 1200, 1113, 1038, 802  $\text{cm}^{-1}$ ;  $^1\text{H}$  NMR (400 MHz,  $\text{CD}_3\text{CN-d}_3$ )  $\delta$  6.94 (s, 2H), 6.87 (s, 1H), 6.80 – 6.75 (m, 2H), 4.71 (d,  $J = 8.5$  Hz, 1H), 4.59 (s, 1H), 4.29 (dd,  $J = 12.6, 8.7$  Hz, 1H), 3.67 (dd,  $J = 8.5, 2.6$  Hz, 1H), 3.64 (s, 1H), 3.47 (dd,  $J = 10.8, 6.0$  Hz, 1H), 3.36 (dd,  $J = 10.8, 6.8$  Hz, 1H), 3.11 (dd,  $J = 17.4, 12.7$  Hz, 1H), 2.84 (dd,  $J = 17.4, 8.8$  Hz, 1H);  $^{13}\text{C}$  NMR (101 MHz,  $\text{CD}_3\text{CN-d}_3$ )  $\delta = 174.5, 171.9, 144.7, 144.6, 125.2, 121.0, 115.7, 115.4, 89.8, 80.3, 69.9, 69.2, 62.0, 41.6, 33.5$  ppm; HRMS  $m/z$  calcd for  $\text{C}_{15}\text{H}_{16}\text{O}_8$   $[\text{M}+\text{Na}]^+$ : 347.0737; found: 347.0741.

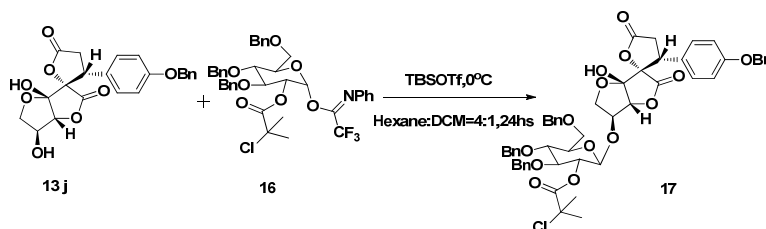

**Synthesis of 17:** To a mixture of **13j** (116 mg, 0.28 mmol), **16** (472 mg, 0.65 mmol), and 4 Å MS (1.0 g) was added dry  $\text{CH}_2\text{Cl}_2$  (1.6 mL) and hexane (0.4 mL). The mixture was stirred for 45 min at 25 °C before it was cooled to 0 °C. TBSOTf (30 mg, 113  $\mu\text{mol}$ ) in  $\text{CH}_2\text{Cl}_2$  (100  $\mu\text{L}$ ) was added dropwise and the reaction was allowed to stir for another 24 h before quenched by addition of

NEt<sub>3</sub>. The mixture was filtrated and concentrated in *vacuo* to afford crude material, which was purified by preparative TLC (EtOAc/petroleum ether = 1/1) to give β-glycoside **17** (62 mg, 46%) as a white foam.

**Characteristic data of 17:** R<sub>f</sub> = 0.30 (silica gel, EtOAc/petroleum ether = 1/1); [α]<sup>20</sup><sub>D</sub> = +6.5 (*c* = 0.2, CHCl<sub>3</sub>); IR ν<sub>max</sub> (film): 2980, 2897, 2360, 2329, 1552, 1264, 1061, 836, 736, 700 cm<sup>-1</sup>; <sup>1</sup>H NMR (400 MHz, CDCl<sub>3</sub>) δ = 7.43 – 7.23 (m, 20H), 7.17-7.15 (m, 2H), 6.94 (d, *J* = 8.7 Hz, 1H), 5.02 (s, 2H), 4.99 (t, *J* = 8.4 Hz, 1H, H<sub>2</sub>'), 4.80 – 4.70 (m, 3H), 4.57 – 4.39 (m, 5H), 4.29 – 4.25 (m, 2H), 4.04 (dd, *J* = 10.5, 4.1 Hz, 2H), 3.89 (s, 2H), 3.73 (dd, *J* = 5.2, 3.6 Hz, 1H), 3.67 – 3.60 (m, 1H), 3.47 (s, 1H), 3.21 (dd, *J* = 17.3, 13.3 Hz, 1H), 2.88 (dd, *J* = 17.3, 8.4 Hz, 1H), 1.76-1.62 (m, 6H, CCIMe<sub>2</sub>); <sup>13</sup>C NMR (101 MHz, CDCl<sub>3</sub>) δ = 172.8, 171.0, 170.4, 159.2, 137.8, 137.6, 136.5, 129.9, 128.7, 128.5, 128.5, 128.4, 128.2, 128.0, 127.9, 127.9, 127.8, 127.7, 127.5, 127.3, 123.8, 115.5, 105.2, 100.6, 88.4, 84.5, 82.2, 79.5, 77.2, 75.3, 75.2, 75.1, 74.7, 74.5, 73.5, 70.1, 68.2, 64.3, 44.6, 33.9, 29.7, 29.4 ppm; HRMS *m/z* calcd for C<sub>53</sub>H<sub>53</sub>ClO<sub>14</sub> [M+Na]<sup>+</sup>: 971.3016; found: 971.3003.

Note: **17** was assigned as β-glycoside based on the observed coupling constant between H1' and H2' (*J*<sub>H1'-H2'</sub> = 8.4 Hz), and the 12-OH glycoside was confirmed by the observed HMBC signal between H<sub>1</sub>' and C<sub>12</sub>.

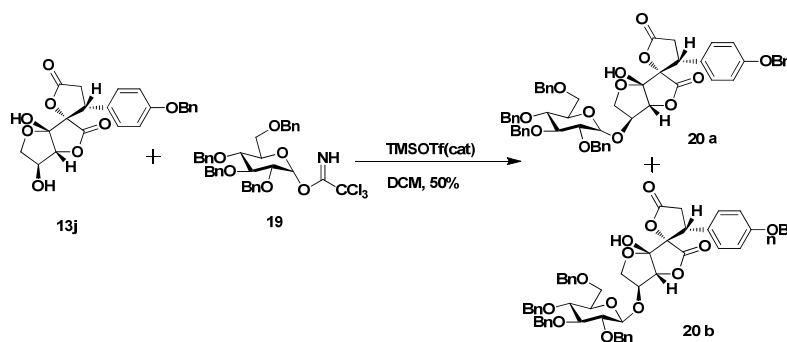

**Synthesis of 20a and 20b:** Compound **13j** (225 mg, 0.55 mmol) and **19** (748 mg, 1.10 mmol) was dried in *vacuo* for 2 h. Powdered 4Å molecular sieves (2 g) was added and the mixture was dissolved in CH<sub>2</sub>Cl<sub>2</sub> (6 mL). The mixture was stirred for 1 h at r.t. before it was cooled to 0 °C. A solution of TMSOTf (16 mg, 70 μmol) in CH<sub>2</sub>Cl<sub>2</sub> (100 μL) was added dropwise. After being stirred for 12 h, the reaction was quenched by addition of several drops of NEt<sub>3</sub>. The mixture was filtrated, and concentrated in *vacuo* to afford crude material, which was purified by preparative TLC (CH<sub>2</sub>Cl<sub>2</sub>/MeOH = 50/1) to afford β-glycoside **20b** (85 mg, 17%) and α-glycoside **20a** (170 mg, 33%).

**Characteristic data of β-Anomer (20b):** [α]<sup>20</sup><sub>D</sub> = -33.5 (*c* = 0.2, CHCl<sub>3</sub>); R<sub>f</sub> = 0.28 (silica gel, CH<sub>2</sub>Cl<sub>2</sub>/MeOH = 50/1); IR ν<sub>max</sub> (film): 2962, 2912, 1817, 1510, 1445, 1257, 1070, 1020, 836, 740, 694 cm<sup>-1</sup>; <sup>1</sup>H NMR (400 MHz, CDCl<sub>3</sub>) δ = 7.47 – 7.24 (m, 25H), 7.13 (d, *J* = 8.8 Hz, 2H), 6.78 (d, *J* = 8.7 Hz, 2H), 4.98 – 4.88 (m, 6H), 4.83 – 4.76 (m, 2H), 4.63 (d, *J* = 11.2 Hz, 1H), 4.51 – 4.43 (m, 2H), 4.39 (d, *J* = 7.6 Hz, 1H, H1'), 4.37 (dd, *J* = 5.2, 10.4 Hz, 1H), 4.33 (dd, *J* = 2.0, 5.2 Hz, 1H), 4.11 (dd, *J* = 10.4, 5.2 Hz, 1H), 3.88 (s, 1H), 3.84 (t, *J* = 9.3 Hz, 1H), 3.68 – 3.51 (m, 5H), 3.43 – 3.39 (m, 1H), 3.12 (dd, *J* = 17.1, 13.6 Hz, 1H), 2.64 (dd, *J* = 17.1, 8.2 Hz, 1H); <sup>13</sup>C NMR (101 MHz, CDCl<sub>3</sub>) δ = 173.1, 170.6, 159.2, 138.3, 138.2, 137.9, 137.8, 136.5, 129.7, 128.6, 128.6, 128.5, 128.5, 128.2, 128.1, 127.9, 127.8, 127.8, 127.7, 127.7, 127.6, 123.5, 115.3, 105.6, 102.8, 88.9, 85.4, 85.1, 81.6, 80.0, 77.3, 76.2, 75.3, 75.1, 74.8, 74.8, 73.4, 70.0, 68.4, 44.9, 33.7 ppm.

Note: **20b** was assigned as  $\beta$ -glycoside based on the observed coupling constant between H1' and H2' ( $J_{H1'-H2'} = 7.6$  Hz), and the 12-OH glycoside was confirmed by the observed HMBC signal between H1' and C12.

**Characteristic data of  $\alpha$ -Anomer (20a)**:  $[\alpha]_D^{20} = +77.5$  ( $c = 0.2$ ,  $\text{CHCl}_3$ );  $R_f = 0.30$  (silica gel,  $\text{CH}_2\text{Cl}_2/\text{MeOH} = 50/1$ ); IR  $\nu_{\text{max}}$  (film): 2963, 2925, 1806, 1263, 1500, 1440, 1000, 799, 600  $\text{cm}^{-1}$ ;  $^1\text{H}$  NMR (400 MHz,  $\text{CDCl}_3$ )  $\delta = 7.45 - 7.26$  (m, 25H), 7.17 - 7.07 (m, 2H), 6.99 (d,  $J = 8.7$  Hz, 2H), 5.09 - 5.02 (m, 2H), 4.94 - 4.87 (m, 2H), 4.82 - 4.77 (m, 2H), 4.70 (d,  $J = 3.8$  Hz, 1H, H1'), 4.58 (dd,  $J = 12.0, 10.9$  Hz, 2H), 4.49 - 4.42 (m, 2H), 4.29 (d,  $J = 2.3$  Hz, 1H), 4.27 - 4.21 (m, 2H), 3.90 (s, 1H), 3.88 - 3.81 (m, 2H), 3.71 - 3.65 (m, 3H), 3.59 - 3.53 (m, 2H), 3.20 (dd,  $J = 17.3, 13.1$  Hz, 1H), 2.89 (dd,  $J = 17.3, 8.5$  Hz, 1H),  $^{13}\text{C}$  NMR (101 MHz,  $\text{CDCl}_3$ )  $\delta = 173.2, 170.6, 159.3, 138.5, 137.8, 137.7, 137.2, 136.7, 130.0, 129.0, 128.9, 128.8, 128.8, 128.7, 128.6, 128.3, 128.3, 128.2, 128.2, 128.1, 128.1, 128.0, 127.7, 124.2, 115.8, 105.7, 94.5, 88.5, 84.6, 81.6, 78.9, 77.4, 75.8, 75.6, 74.5, 73.8, 71.5, 70.2, 70.2, 68.2, 44.7, 34.2$  ppm; HRMS  $m/z$  calcd for  $\text{C}_{56}\text{H}_{54}\text{O}_{13}$   $[\text{M}+\text{Na}]^+$ : 957.3457; found: 957.3458.

Note: **20a** was assigned as  $\alpha$ -glycoside based on the observed coupling constant between H1' and H2' ( $J_{H1'-H2'} = 3.8$  Hz), and the 12-OH glycoside was confirmed by the observed HMBC signal between H1' and C12.

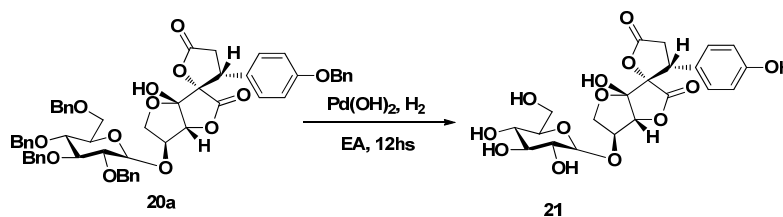

**Synthesis of 21:** To a solution of **20a** (20 mg, 0.02 mmol) in EtOAc (0.4 mL) was added Pd(OH)<sub>2</sub> (5mg). The suspension was stirred at r.t. under hydrogen atmosphere (balloon pressure) for 12 h. The reaction mixture was filtered through celite, washed with acetone three times. The combined solution was evaporated to afford **21** (9.6 mg, quant.).

**Characteristic data of 21:** IR  $\nu_{\text{max}}$  (film): 3356, 2900, 1810, 1780, 1558, 1170, 881  $\text{cm}^{-1}$ ;  $[\alpha]_D^{20} = +43.5$  ( $c = 0.2$ , MeOH);  $^1\text{H}$  NMR (400 MHz, Pyridine-D<sub>5</sub>, containing 1% D<sub>2</sub>O)  $\delta = 7.63$  (d,  $J = 8.4$  Hz, 2H), 7.19 (d,  $J = 8.4$  Hz, 2H), 5.43 (d,  $J = 3.7$  Hz, 1H), 5.23 (s, 1H), 4.82 - 4.70 (m, 2H), 4.61 - 4.40 (m, 6H), 4.33 (t,  $J = 9.3$  Hz, 1H), 4.14 (dd,  $J = 9.8, 3.9$  Hz, 1H), 3.41 (dd,  $J = 17.4, 10.9$  Hz, 1H), 3.15 (dd,  $J = 17.5, 8.9$  Hz, 1H);  $^{13}\text{C}$  NMR (101 MHz, Pyridine-D<sub>5</sub>, containing 1% D<sub>2</sub>O)  $\delta = 174.6, 171.6, 159.1, 130.3, 124.2, 116.5, 107.0, 102.7, 90.4, 86.5, 83.4, 74.7, 74.7, 73.9, 73.3, 71.4, 62.2, 45.2, 34.3$  ppm; HRMS  $m/z$  calcd for  $\text{C}_{21}\text{H}_{24}\text{O}_{13}$   $[\text{M}+\text{Na}]^+$ : 507.1109; found: 507.1106.

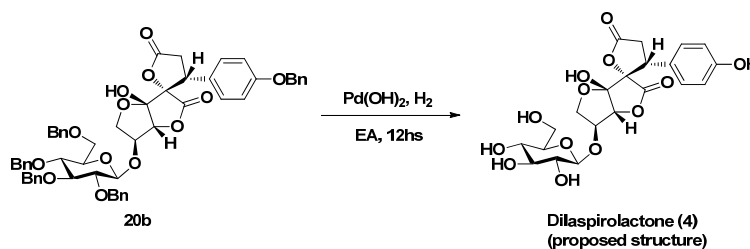

**Synthesis of 4:** The same procedure was employed as that for the synthesis of **21**, with **4** obtained in almost quantitatively yield.

**Characteristic data of 4:** IR  $\nu_{\text{max}}$  (film): 3389, 2925, 1800, 1615, 1518, 1230, 881, 842  $\text{cm}^{-1}$ ;

$[\alpha]_{\text{D}}^{20} = +7.0$  ( $c = 0.4$ , MeOH);  $^1\text{H}$  NMR (400 MHz, Pyridine- $\text{D}_5$ , containing 1%  $\text{D}_2\text{O}$ )  $\delta = 7.64$  (d,  $J = 8.6$  Hz, 2H), 7.22 (d,  $J = 8.6$  Hz, 2H), 4.93 (s, 1H), 4.85 (d,  $J = 8.0$  Hz, 1H), 4.82 – 4.75 (m, 2H), 4.67 (dd,  $J = 10.0, 4.4$  Hz, 1H), 4.56 – 4.50 (m, 2H), 4.29 (dd,  $J = 12.0, 5.6$  Hz, 1H), 4.21 (t,  $J = 9.2$  Hz, 1H), 4.14 (t,  $J = 9.2$  Hz, 1H), 3.99 (t,  $J = 8.4$  Hz, 1H), 3.90 – 3.87 (m, 1H), 3.55 (dd,  $J = 17.4, 12.6$  Hz, 1H), 3.12 (dd,  $J = 17.4, 8.7$  Hz, 1H);  $^{13}\text{C}$  NMR (101 MHz, Pyridine- $\text{D}_5$ , containing 1%  $\text{D}_2\text{O}$ )  $\delta = 175.7, 173.1, 159.9, 131.4, 124.1, 117.4, 107.0, 105.1, 91.2, 88.1, 82.6, 79.2, 78.5, 75.5, 75.3, 72.0, 63.1, 46.2, 34.9$  ppm; HRMS  $m/z$  calcd for  $[\text{M}+\text{Na}]^+$ : 507.1109; found: 507.1104.

## Part 5: NMR spectra

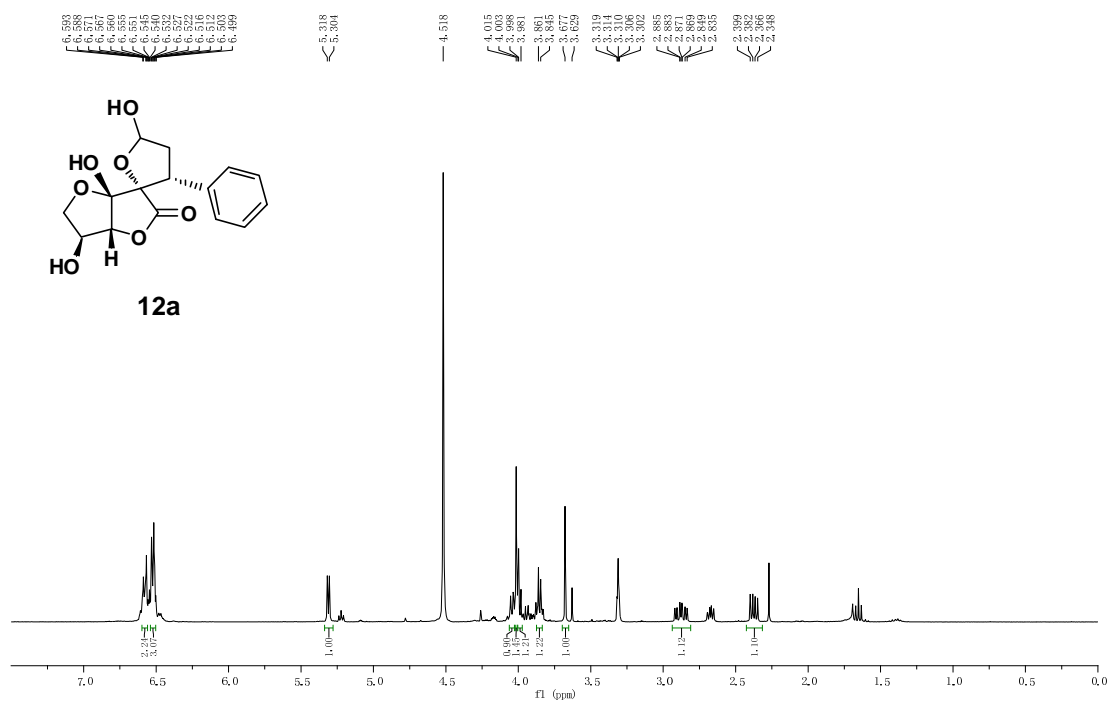

$^1\text{H}$  NMR Spectrum for **12a** (300 MHz,  $\text{CD}_3\text{OD}$ )

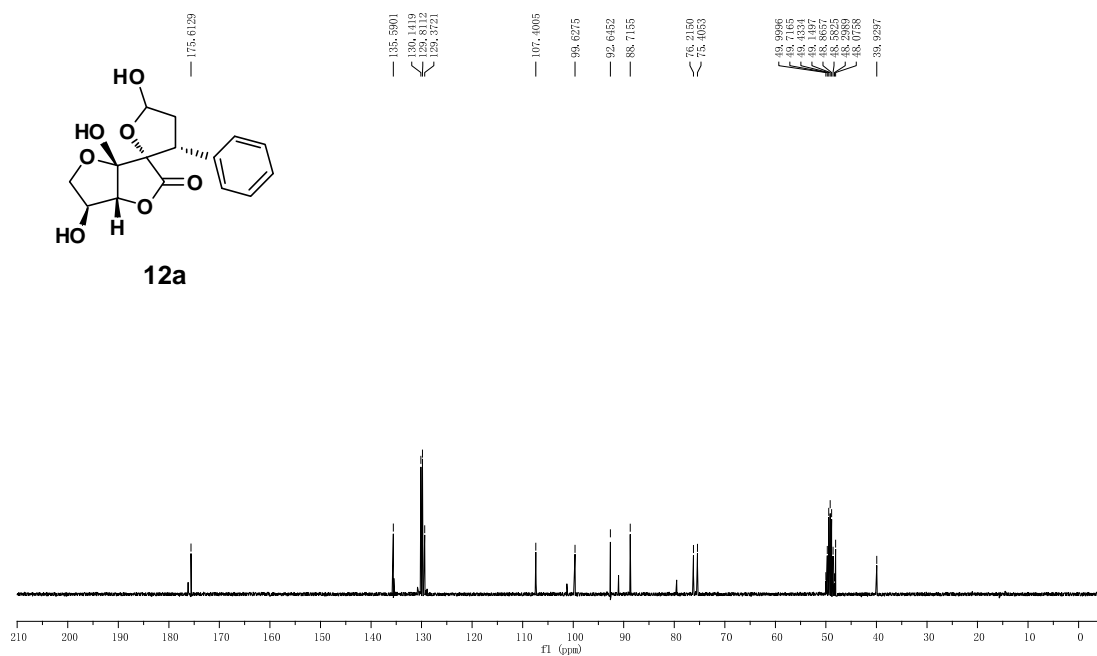

$^{13}\text{C}$  NMR Spectrum for **12a** (75 MHz,  $\text{CD}_3\text{OD}$ )

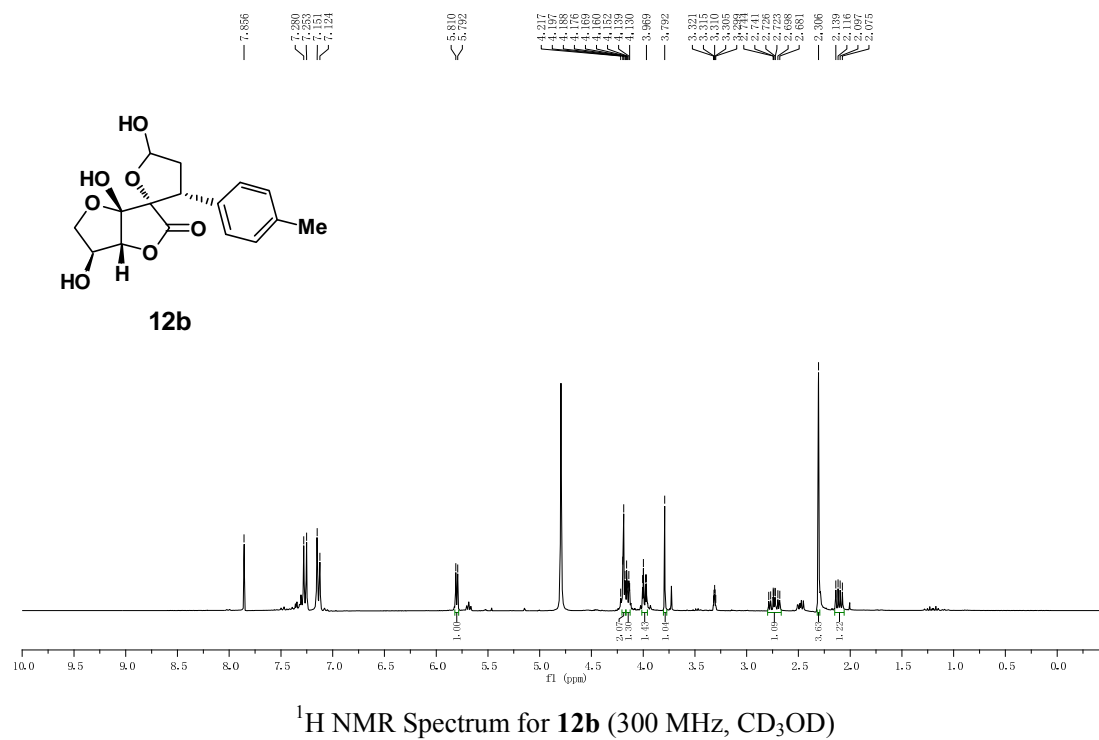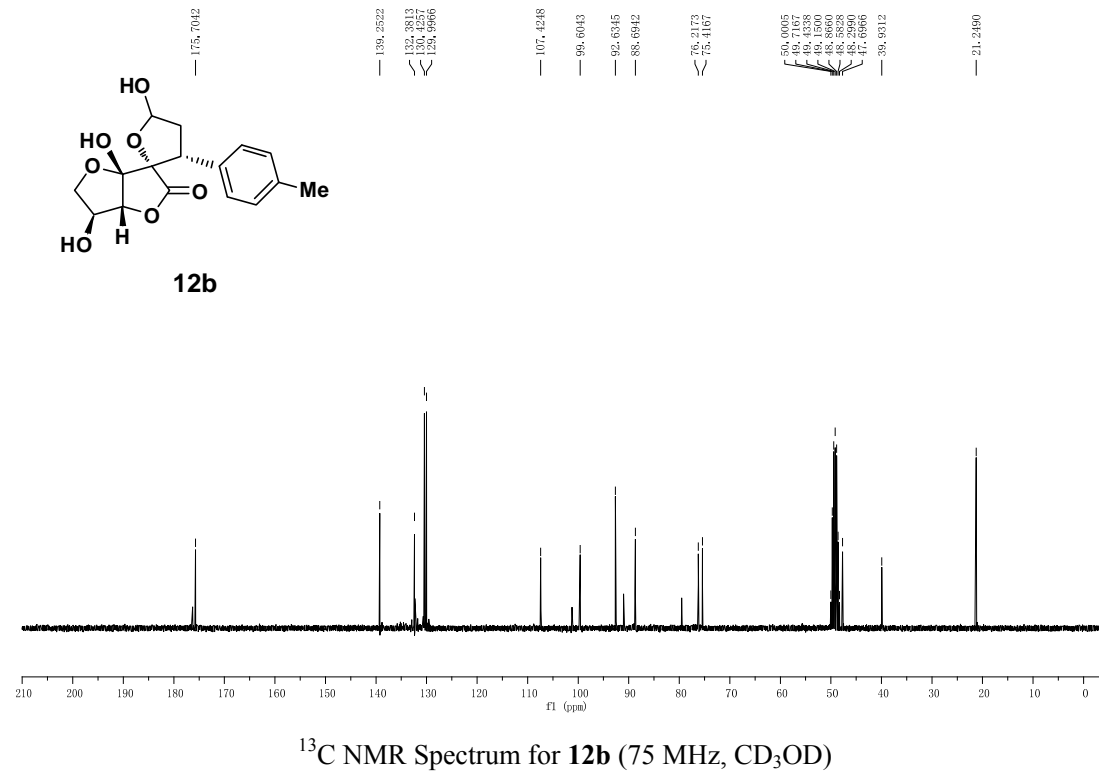



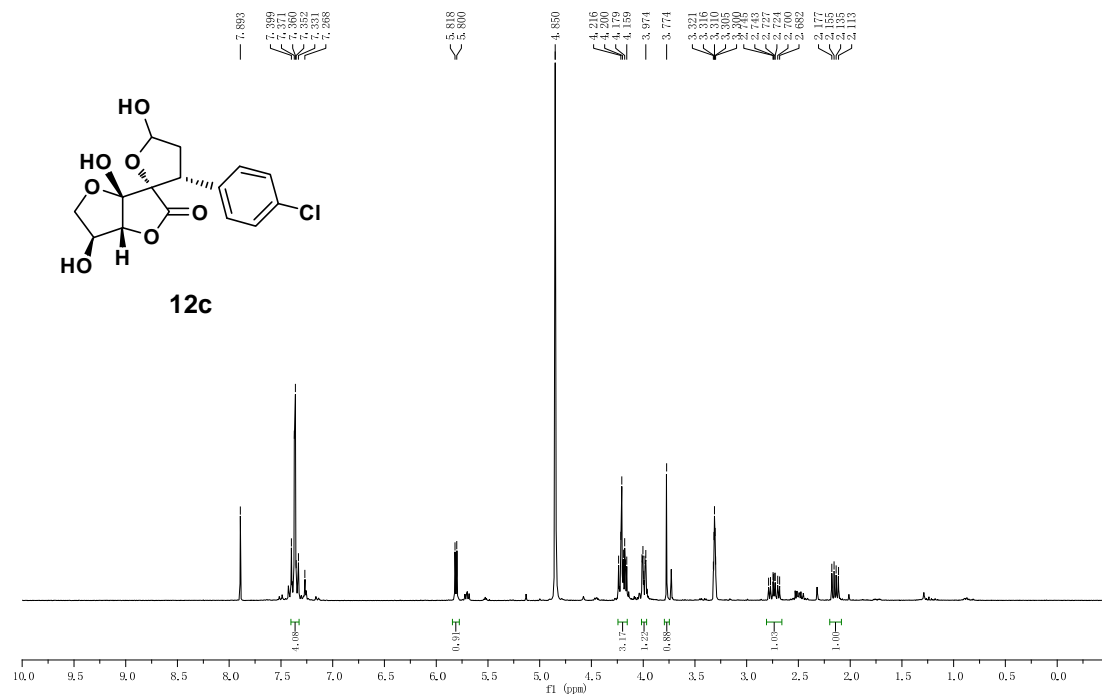

<sup>1</sup>H NMR Spectrum for **12c** (300 MHz, CD<sub>3</sub>OD)

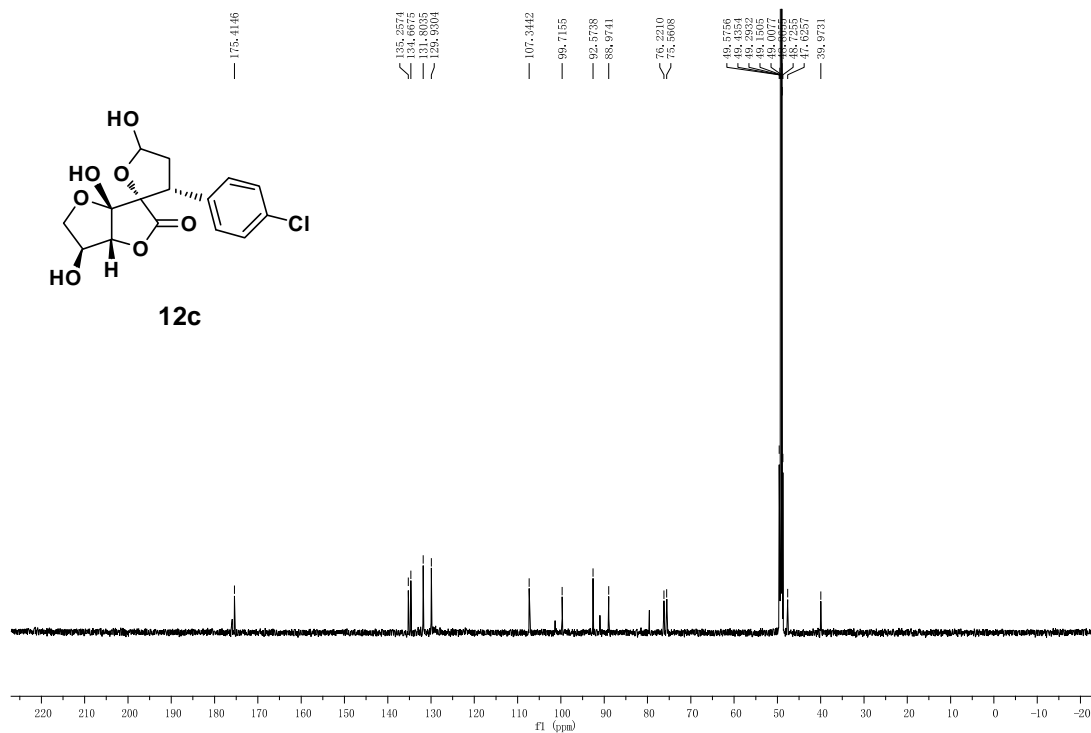

<sup>13</sup>C NMR Spectrum for **12c** (150 MHz, CD<sub>3</sub>OD)

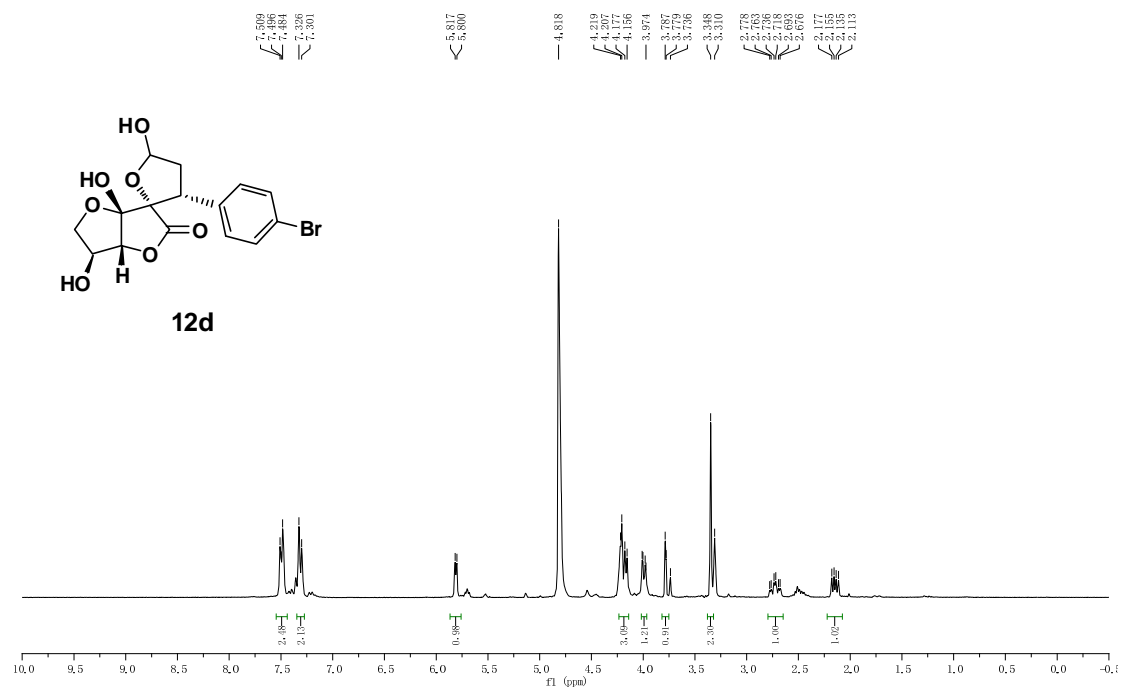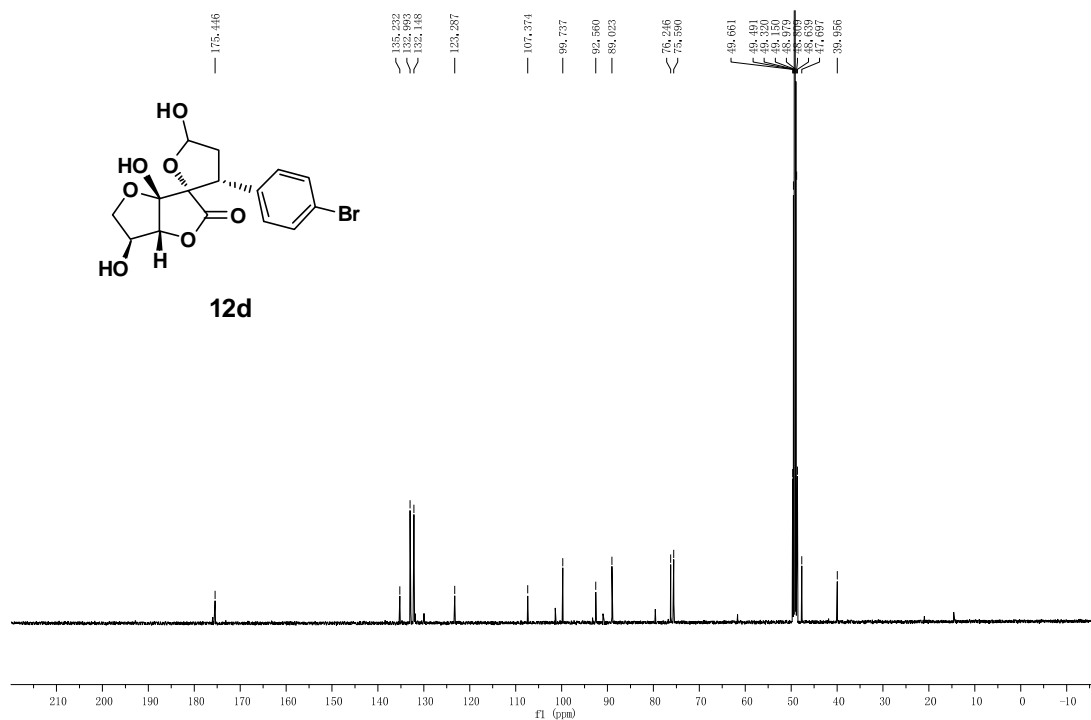

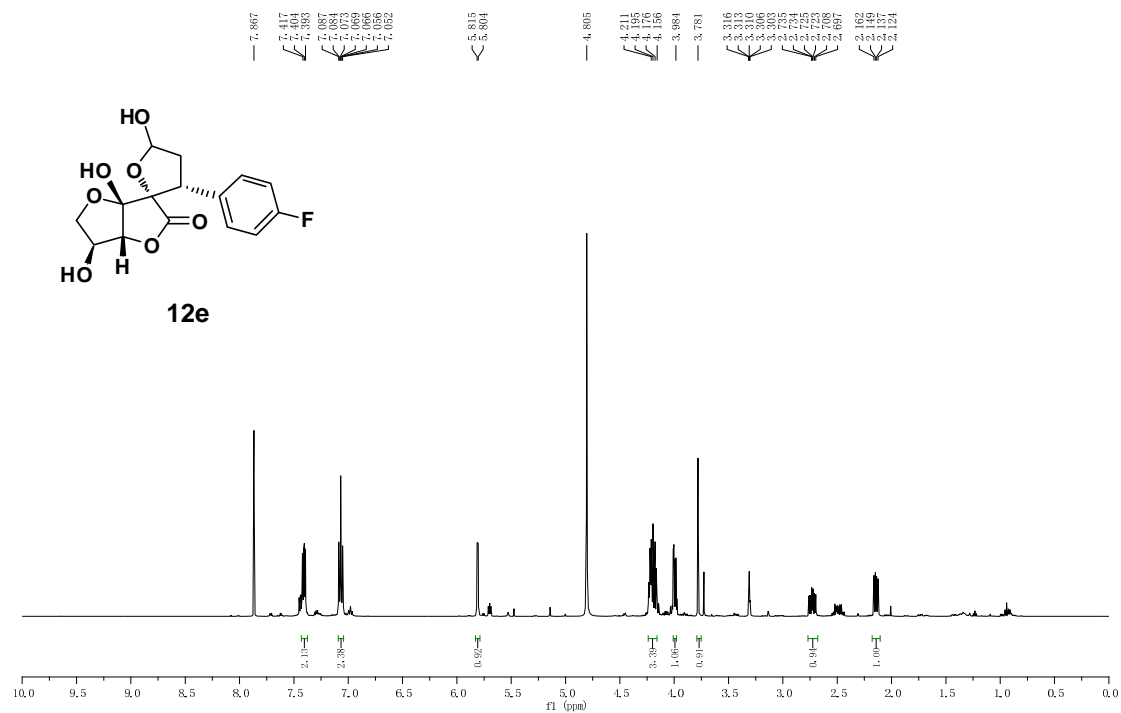

**<sup>1</sup>H NMR Spectrum for 12e (500 MHz, CD<sub>3</sub>OD)**

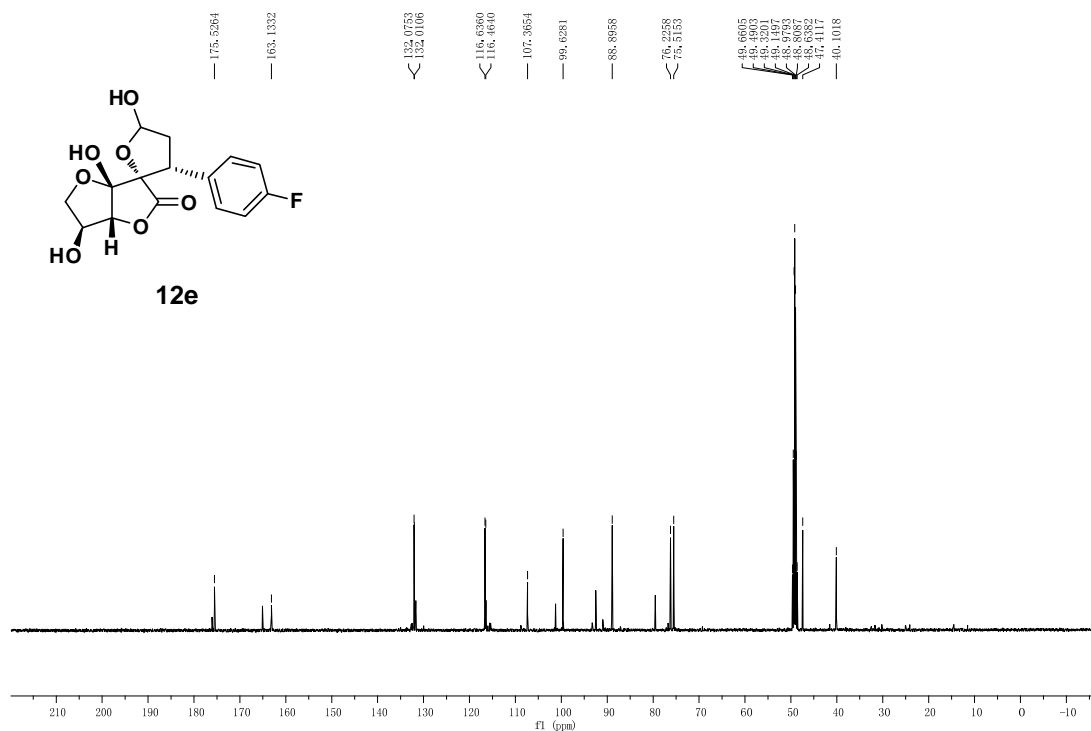

**<sup>13</sup>C NMR Spectrum for 12e (125 MHz, CD<sub>3</sub>OD)**

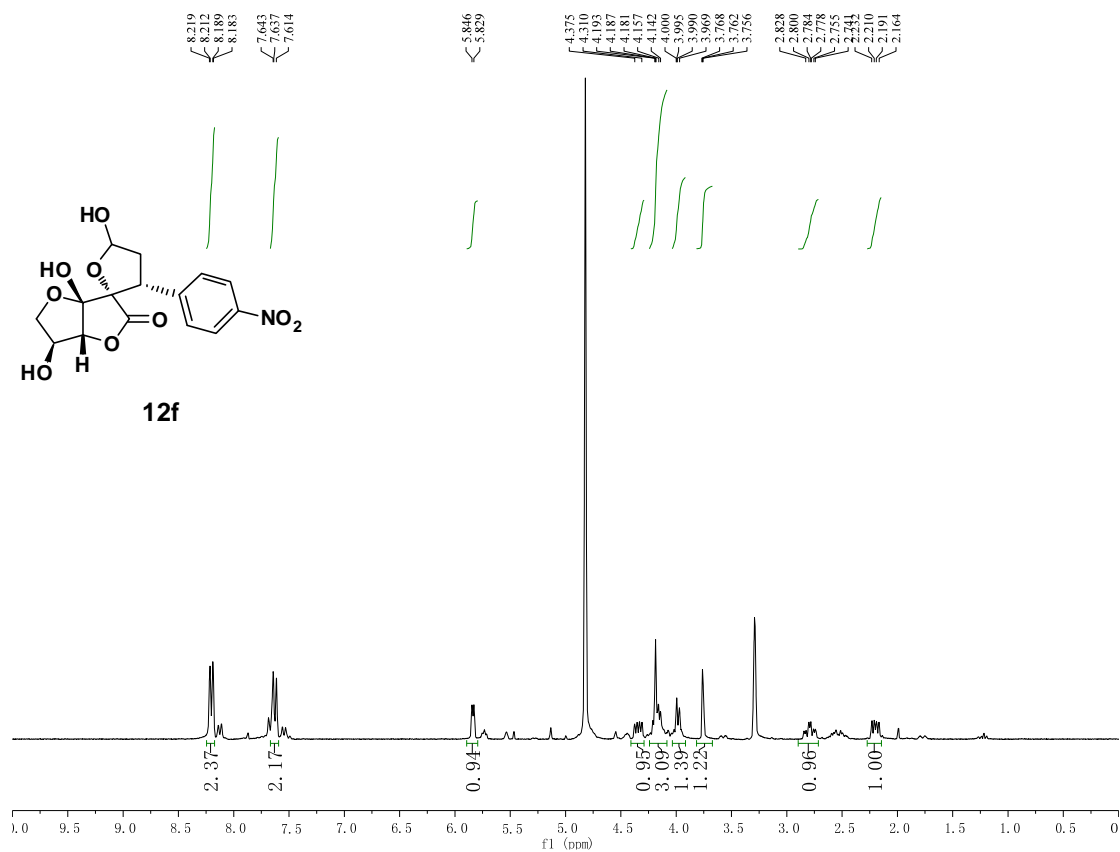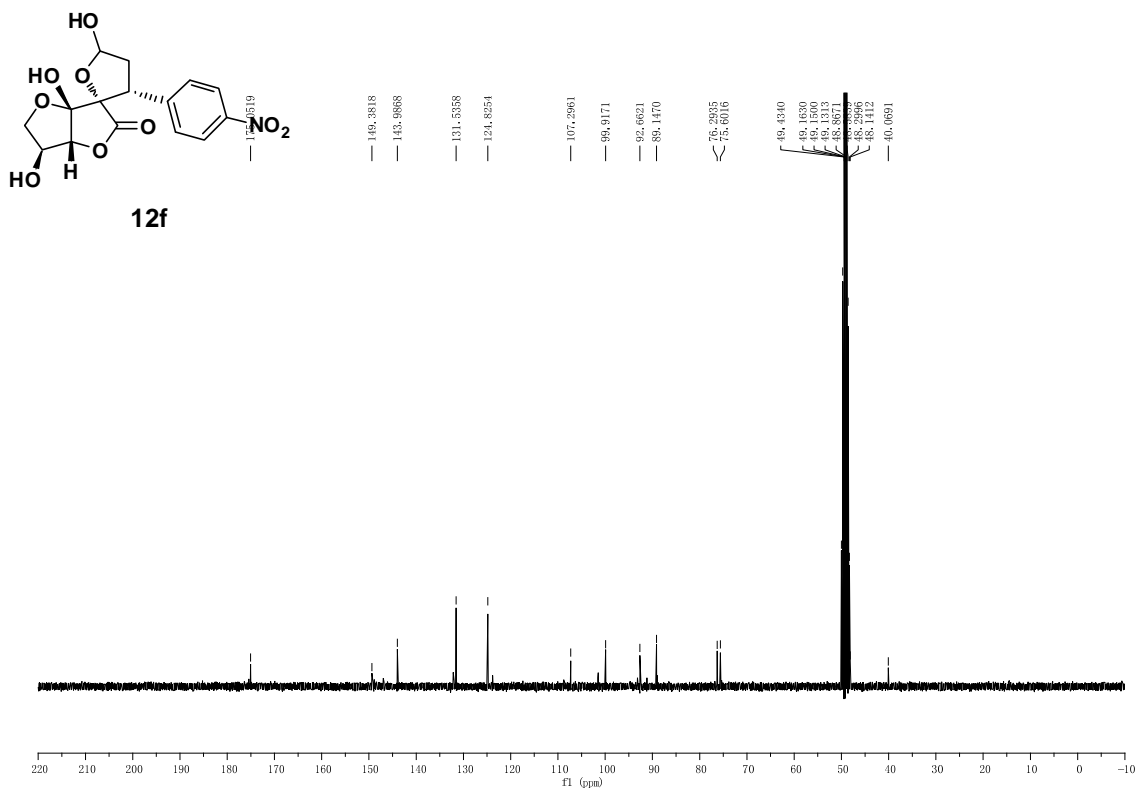

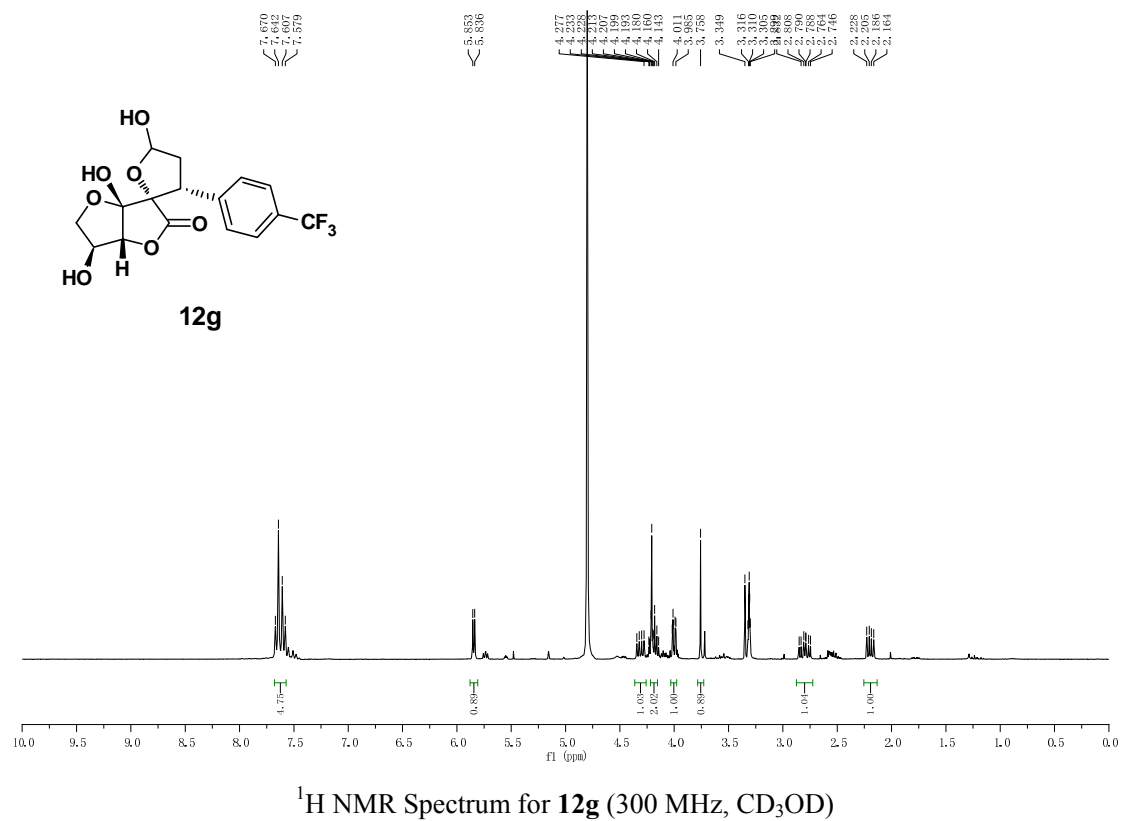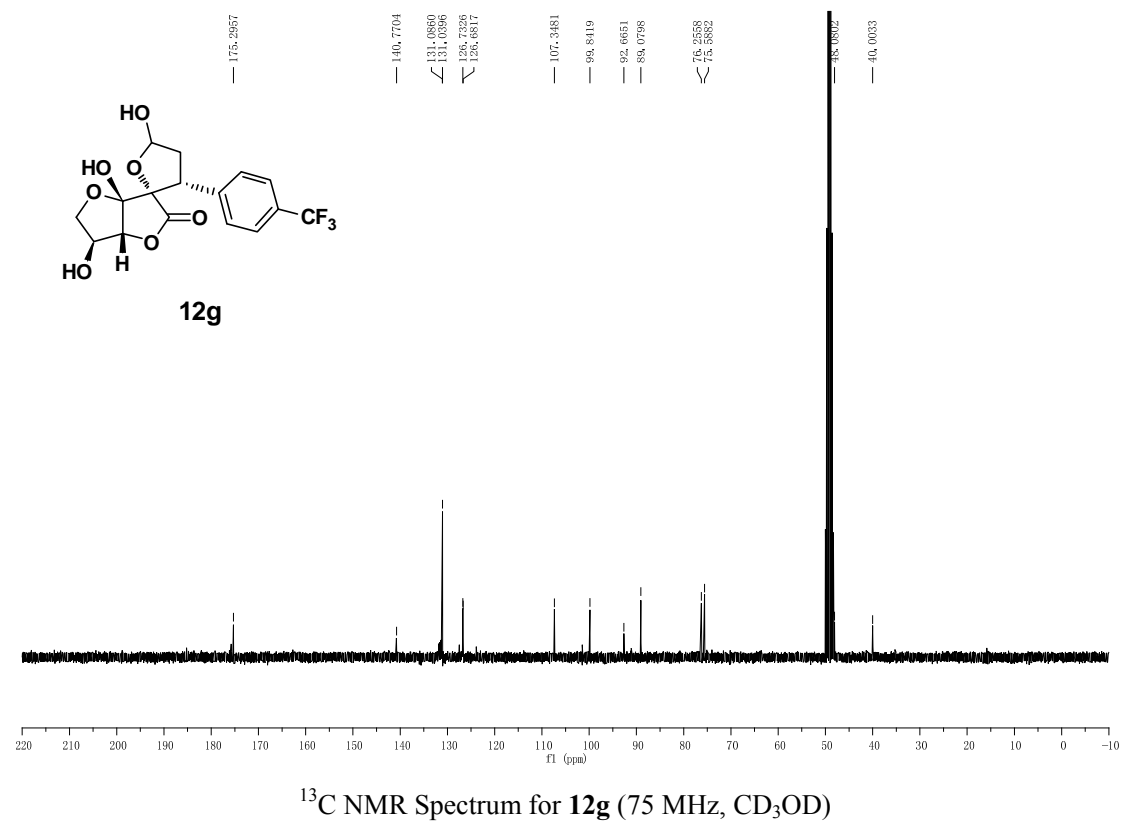

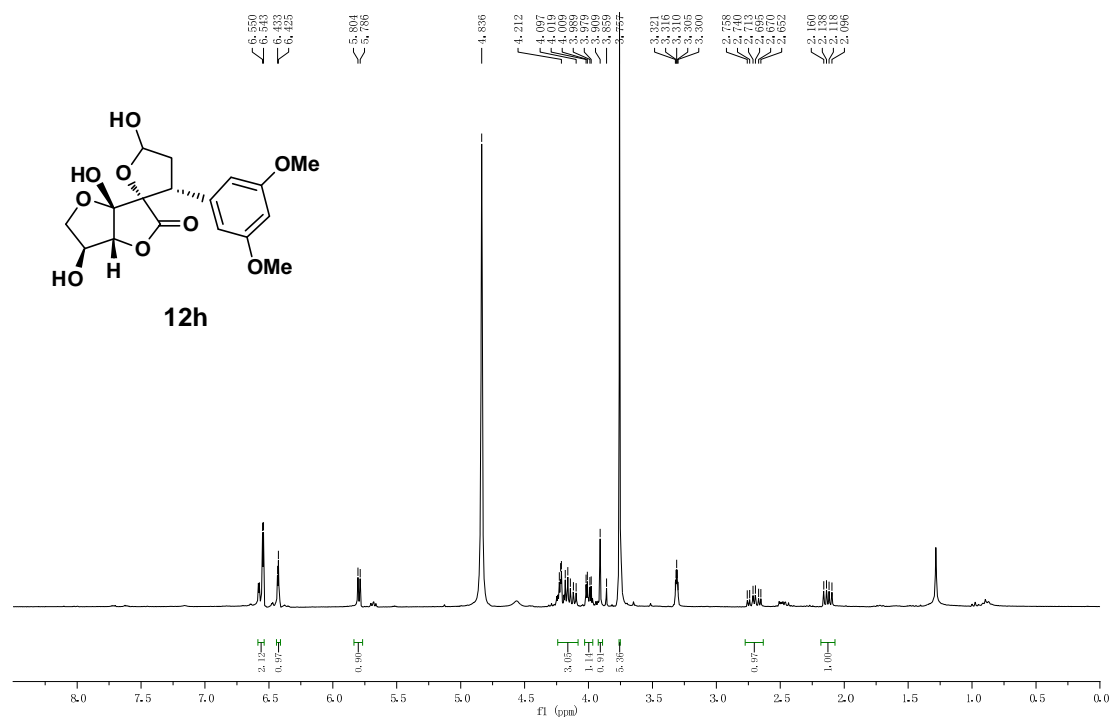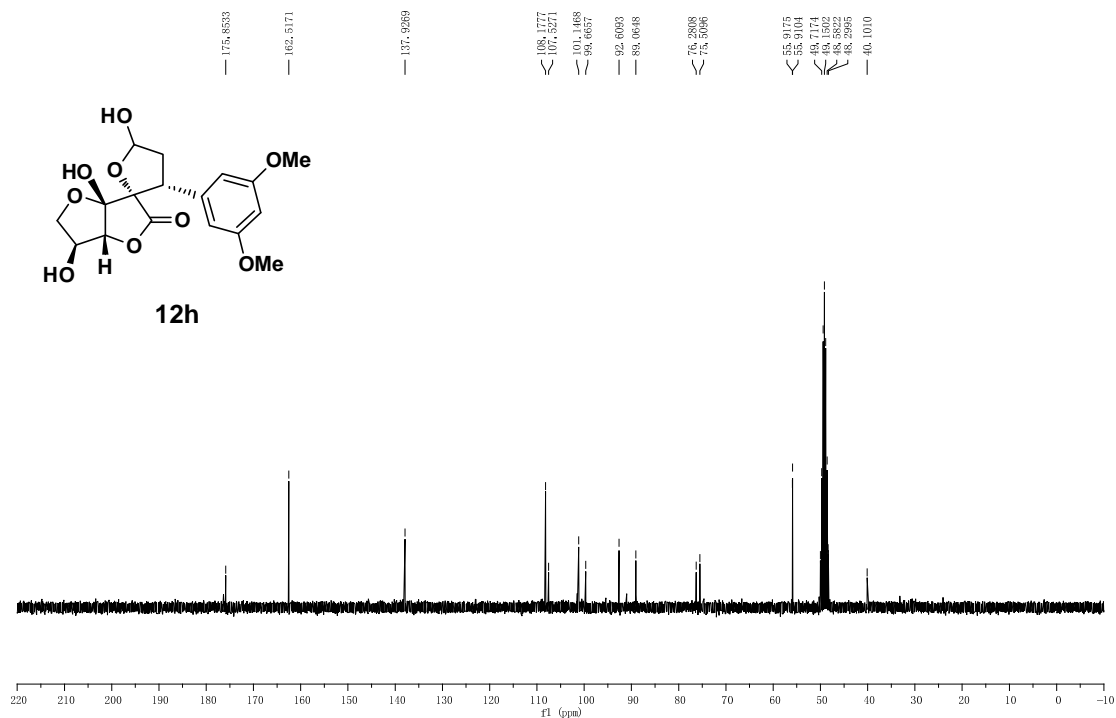

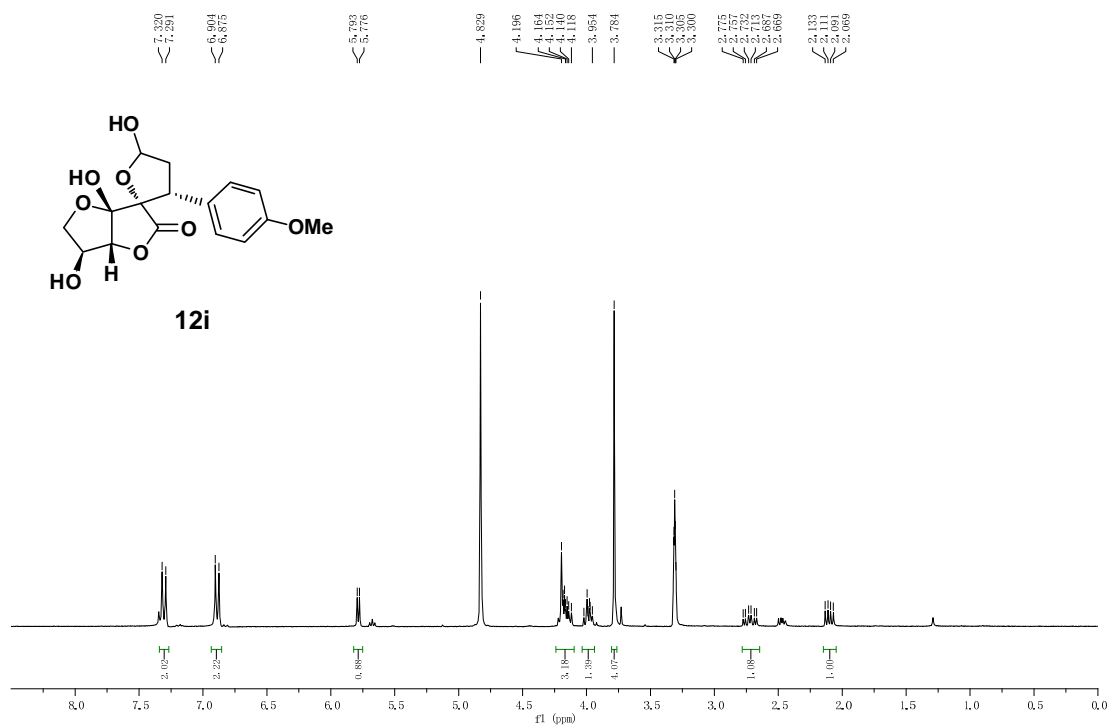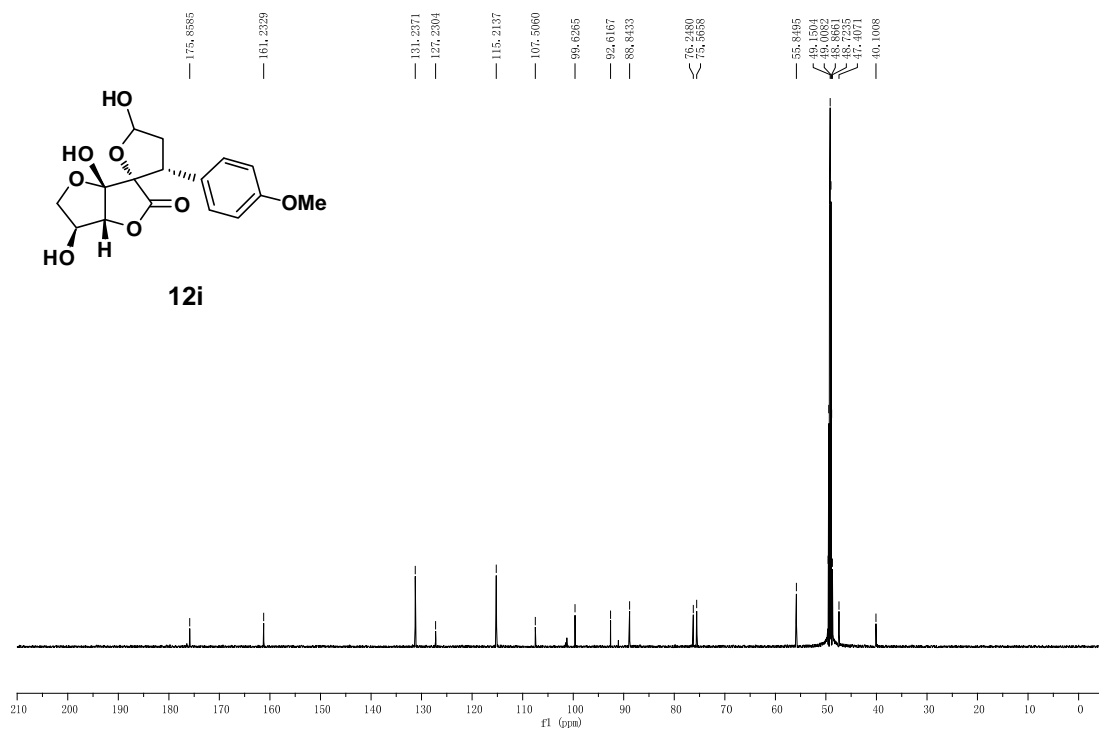

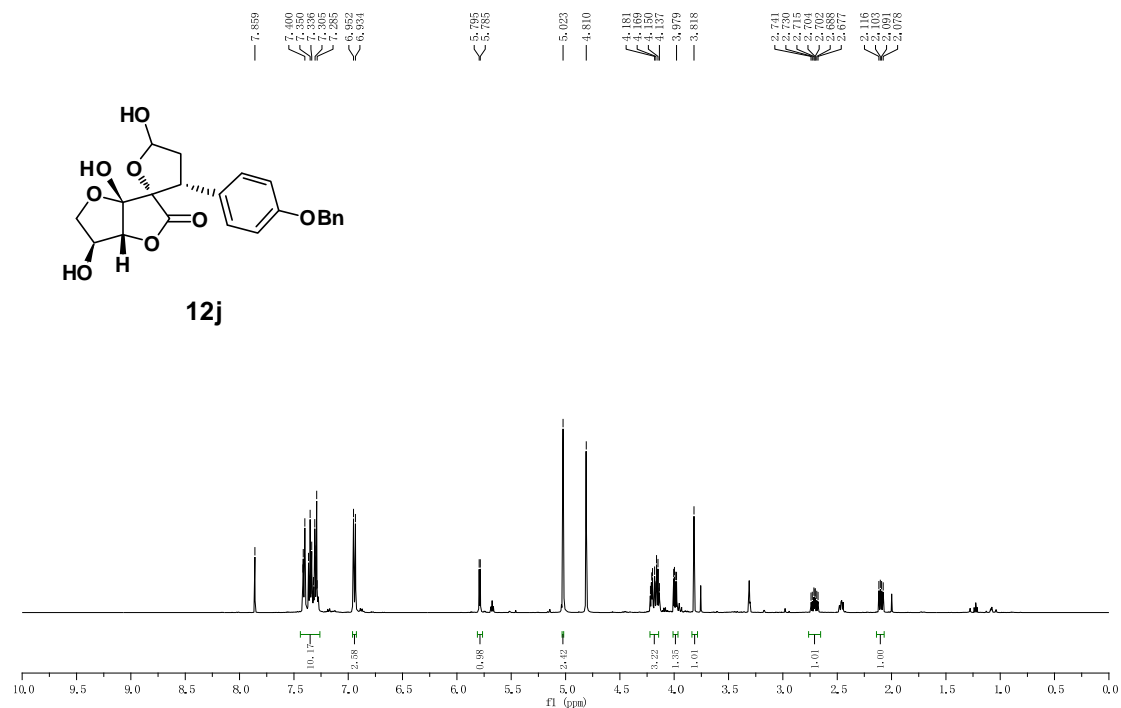

<sup>1</sup>H NMR Spectrum for **12j** (500 MHz, CD<sub>3</sub>OD)

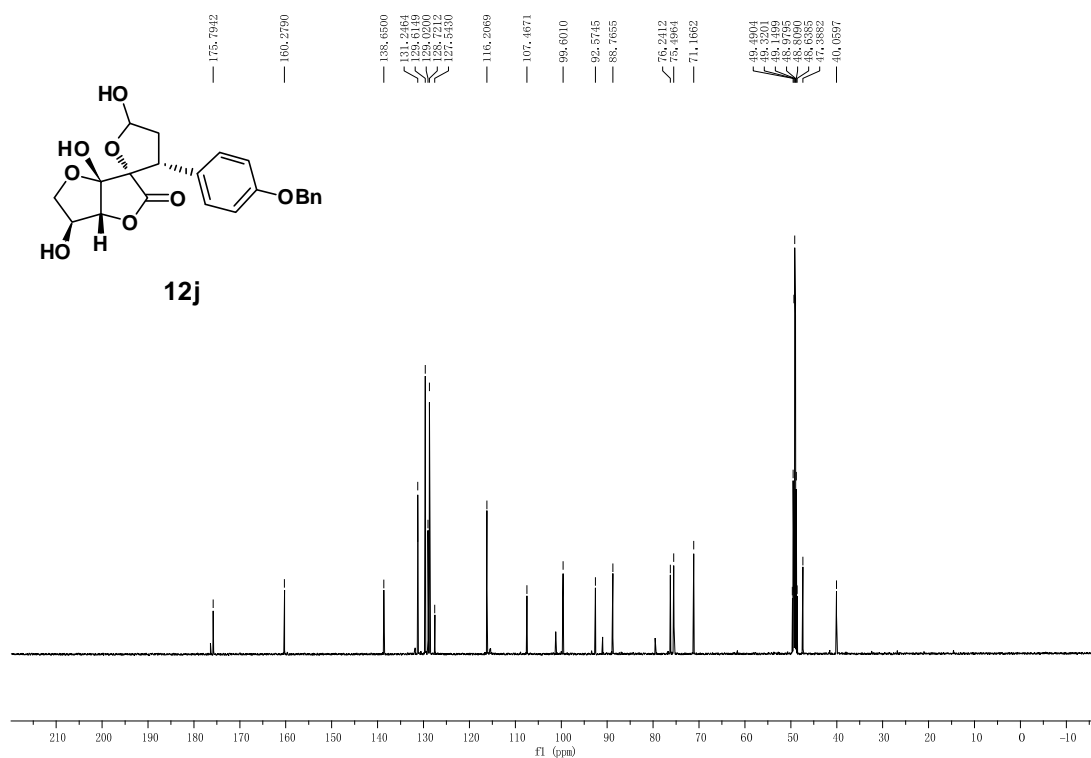

<sup>13</sup>C NMR Spectrum for **12j** (125 MHz, CD<sub>3</sub>OD)



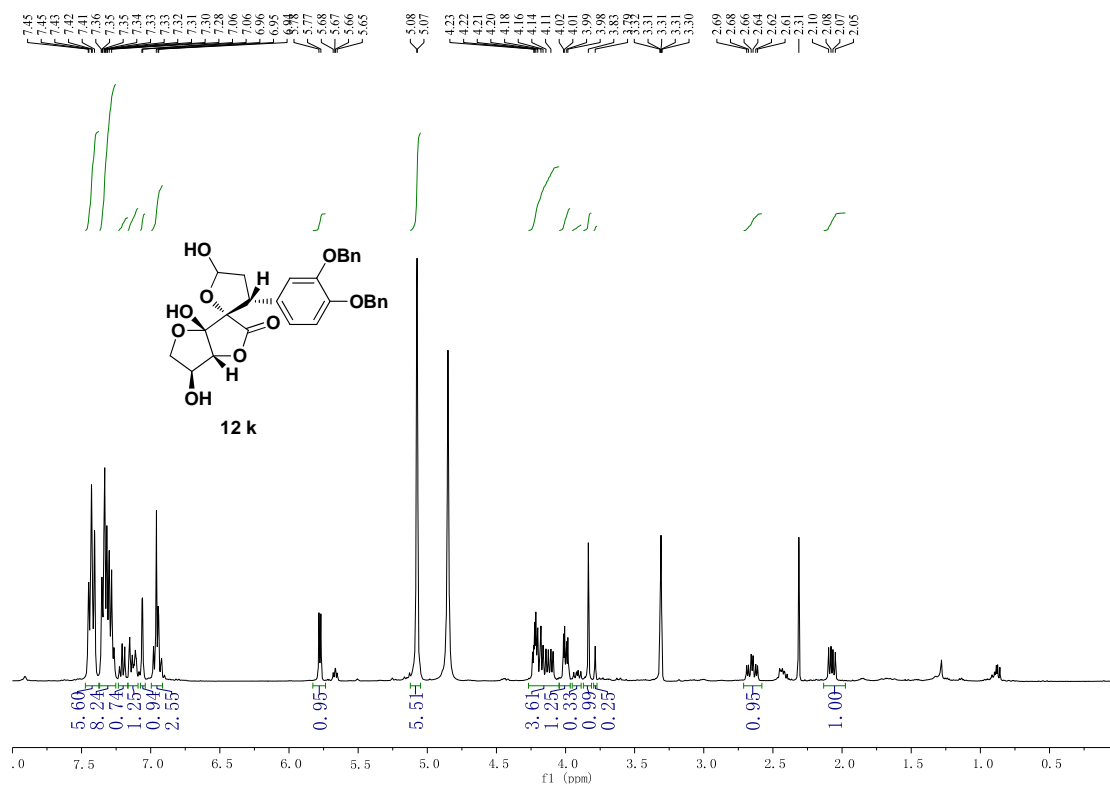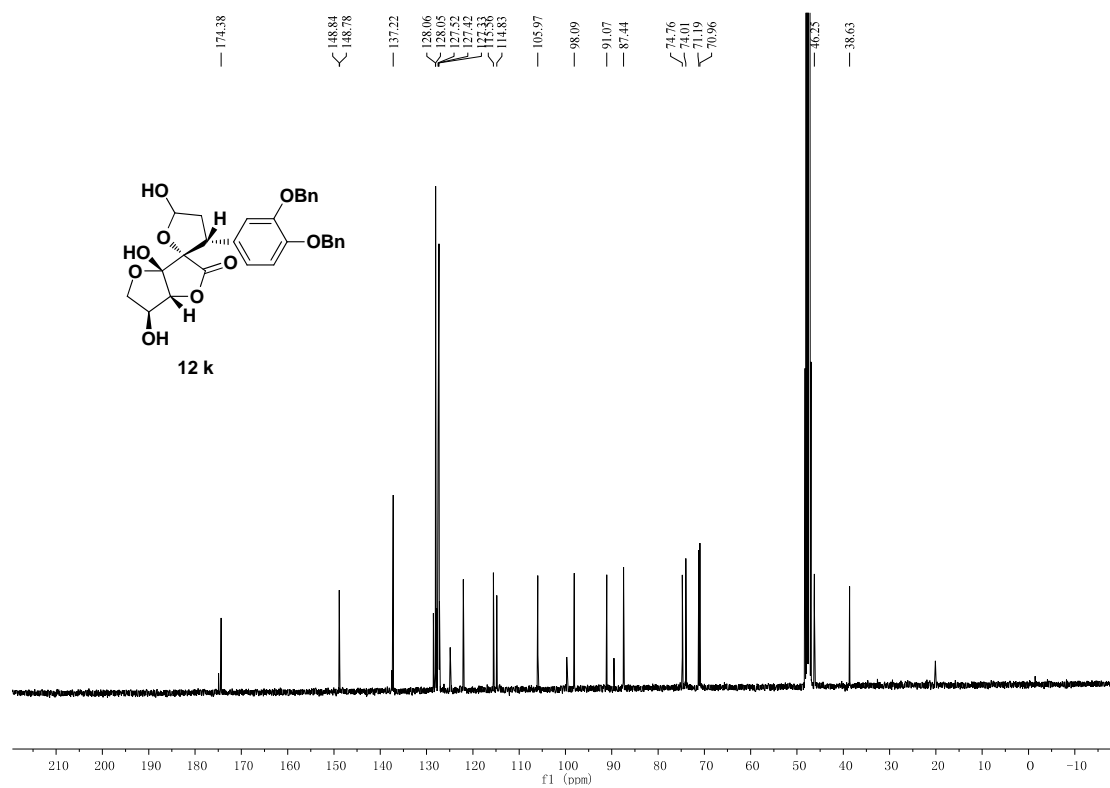

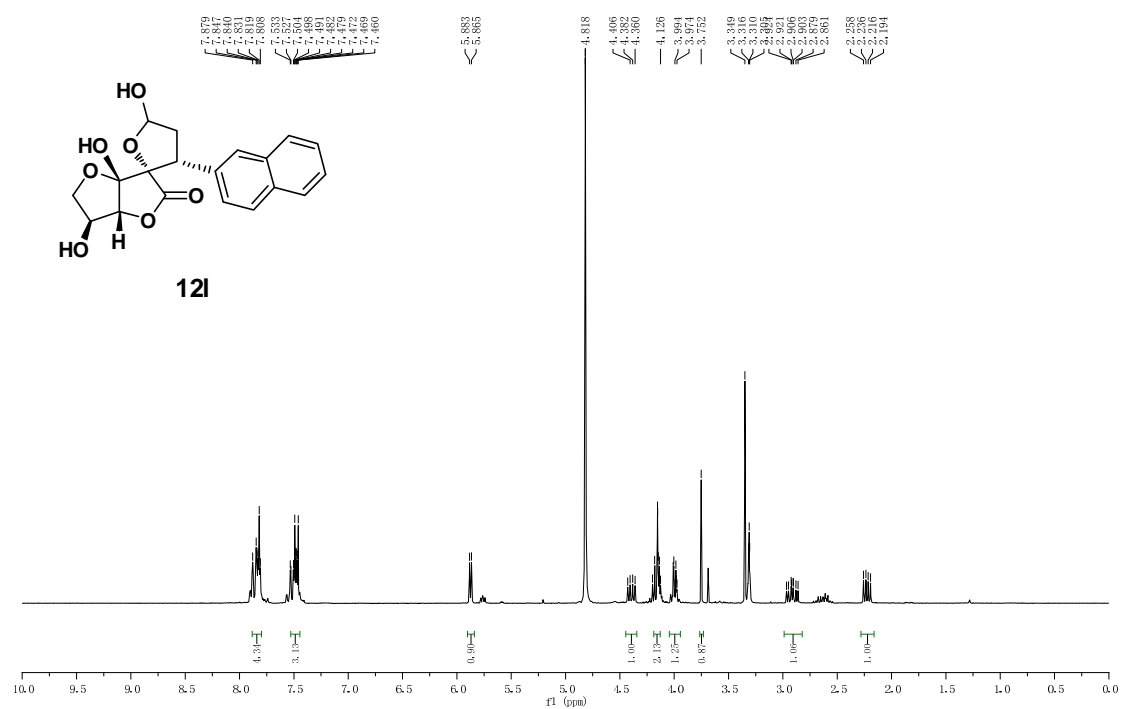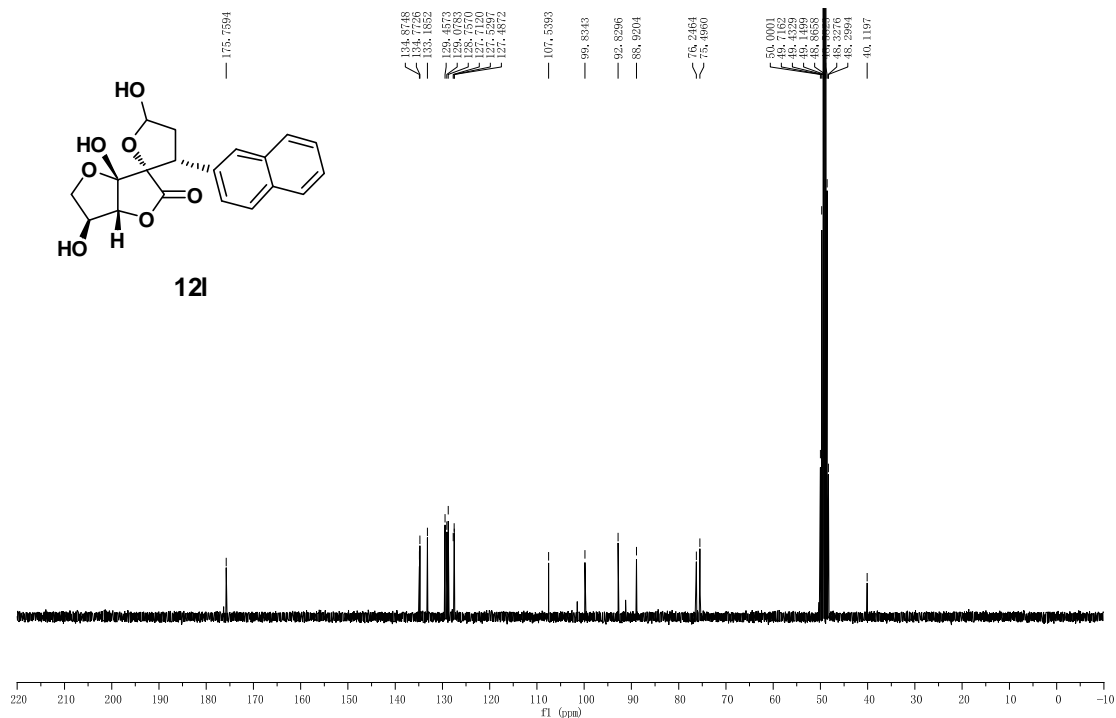

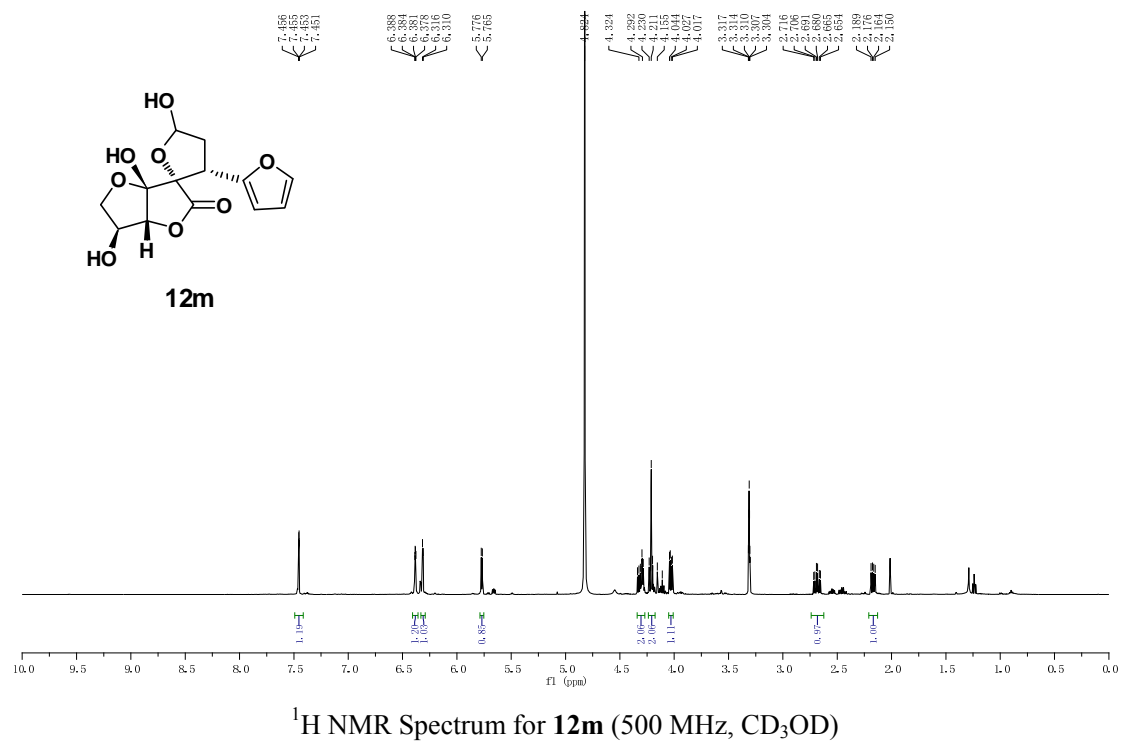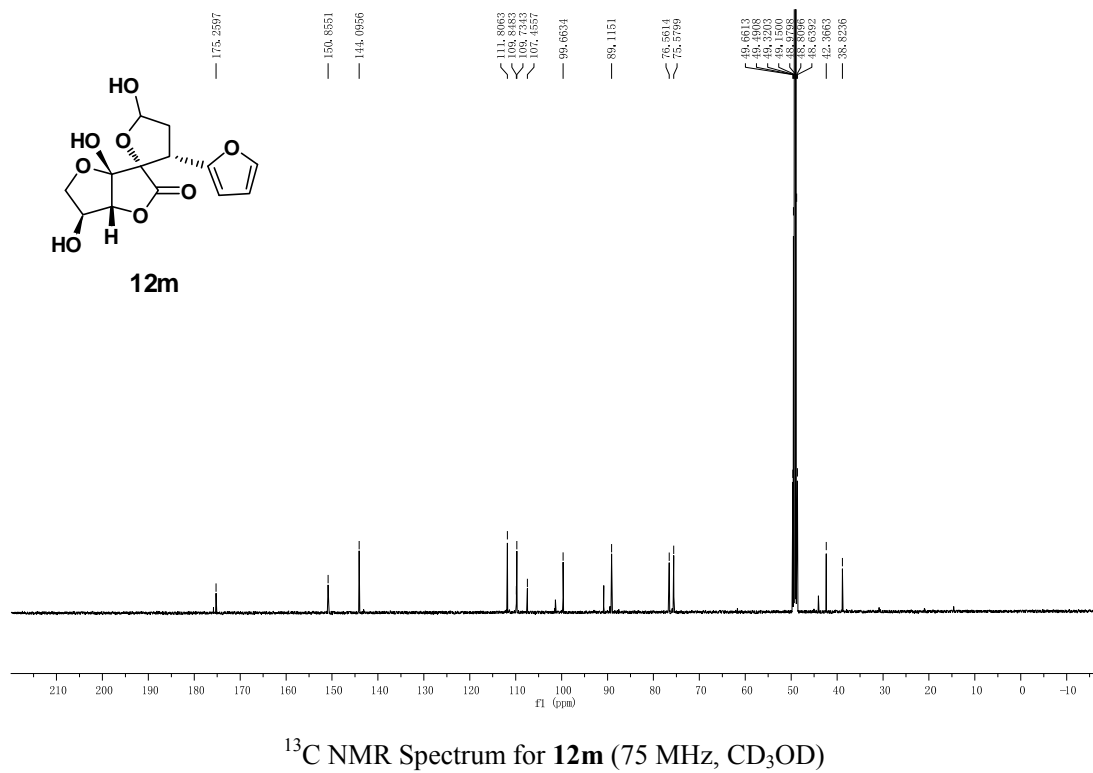

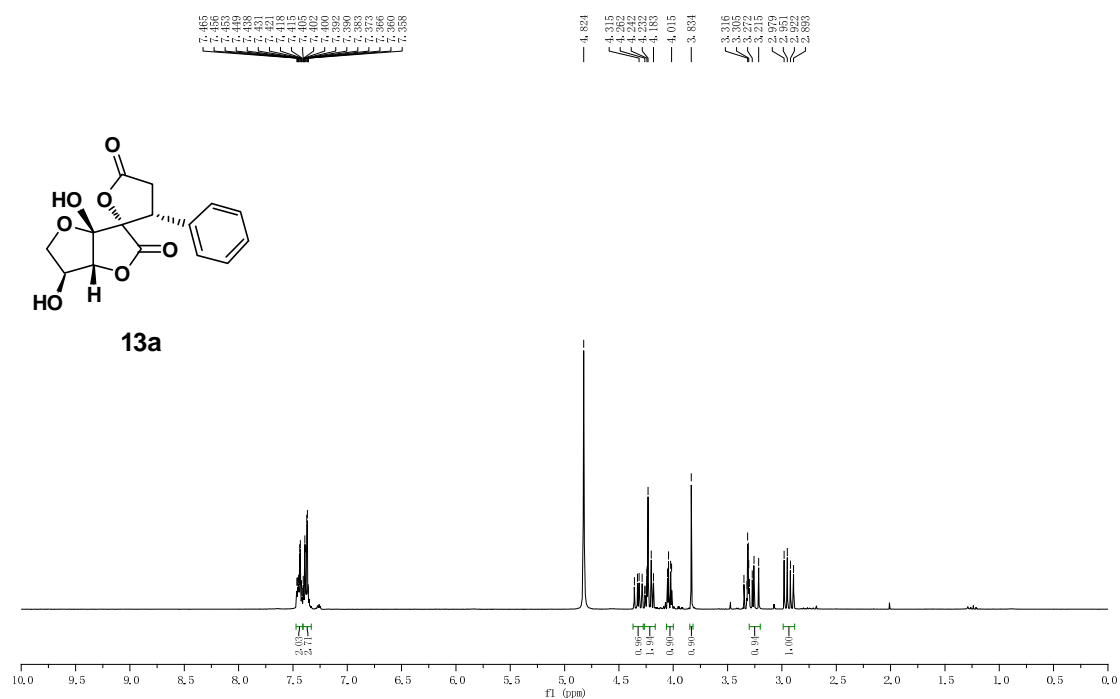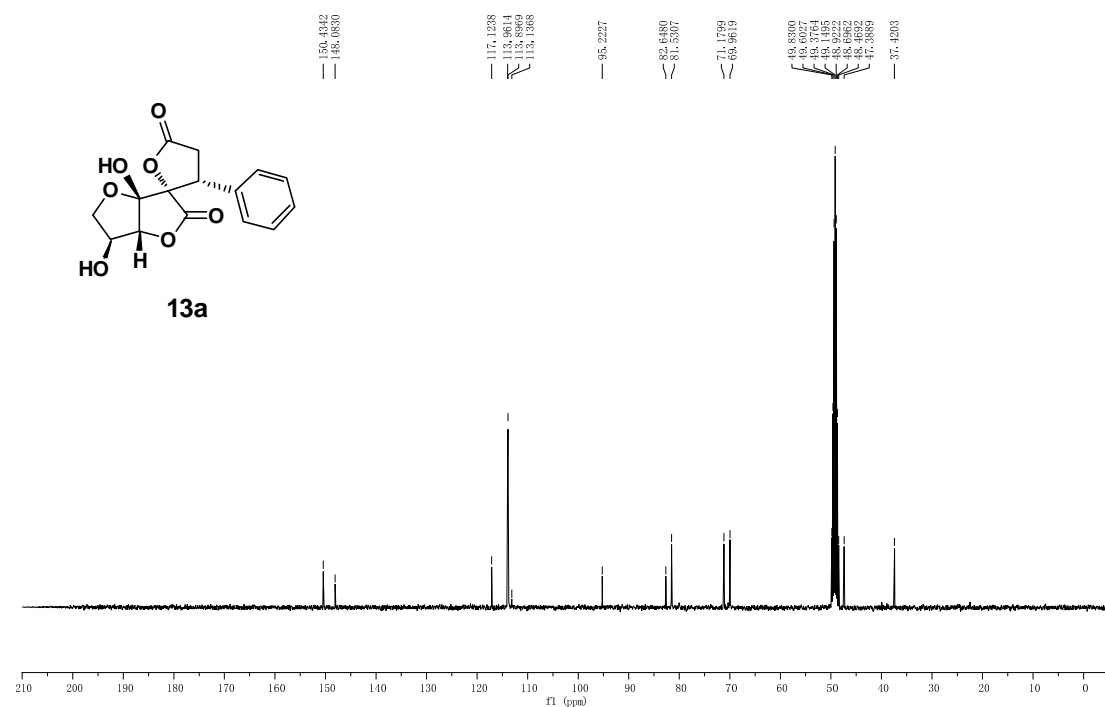

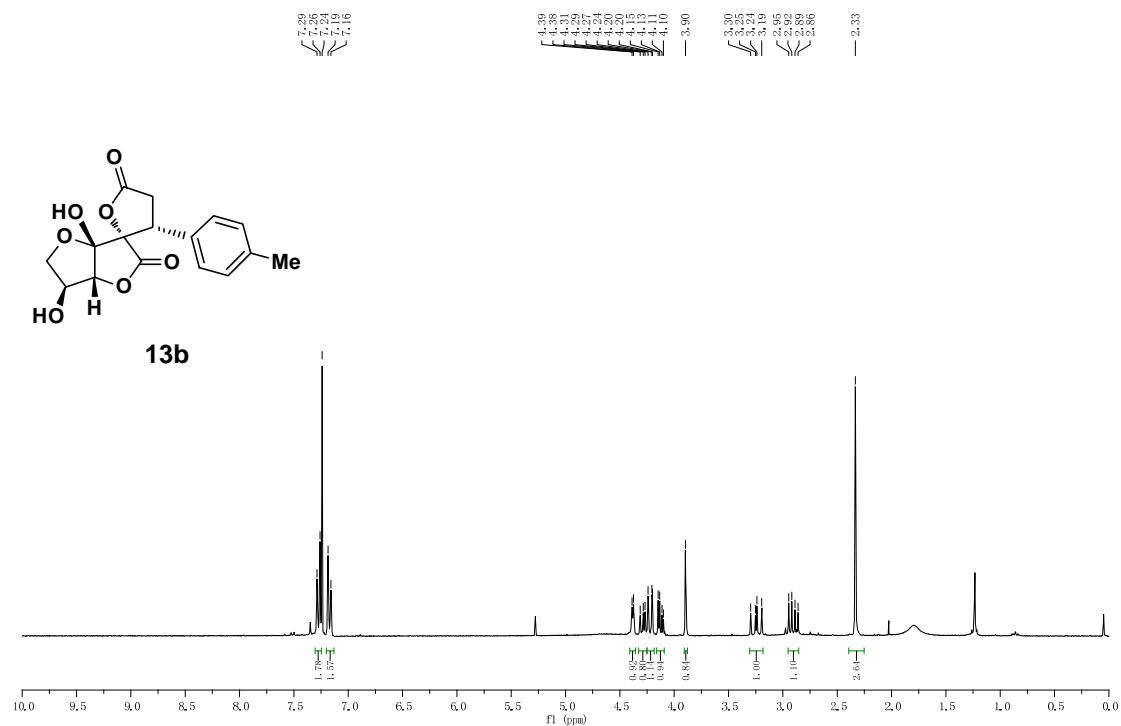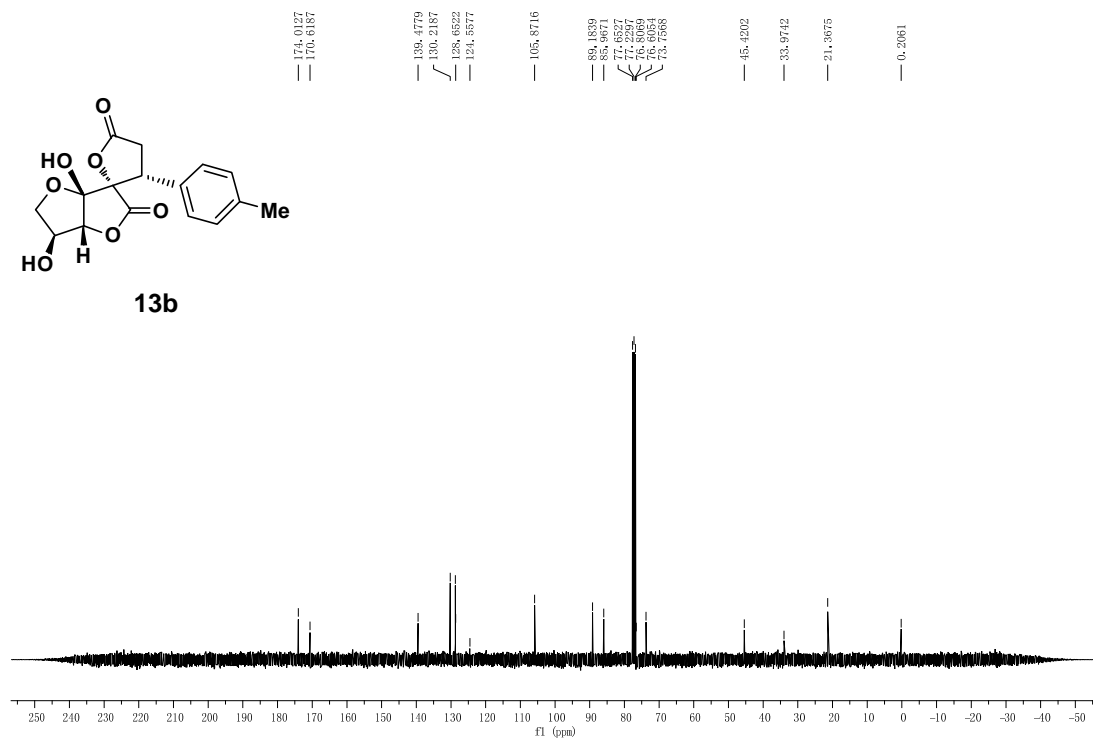

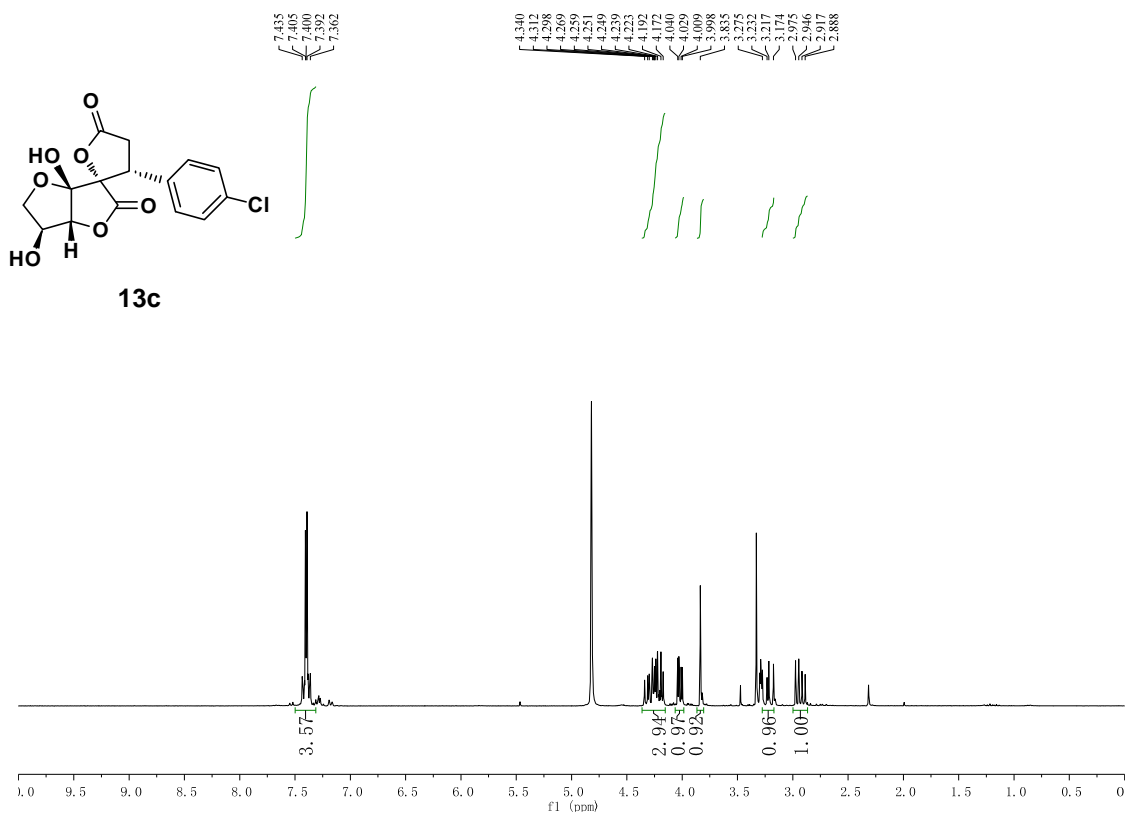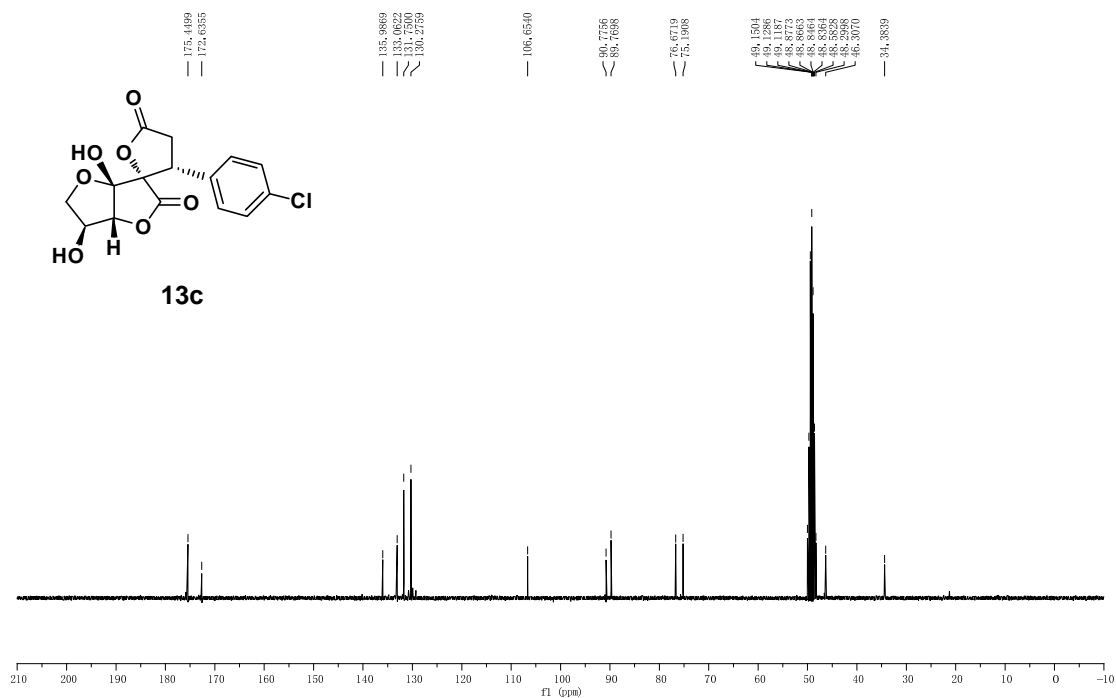

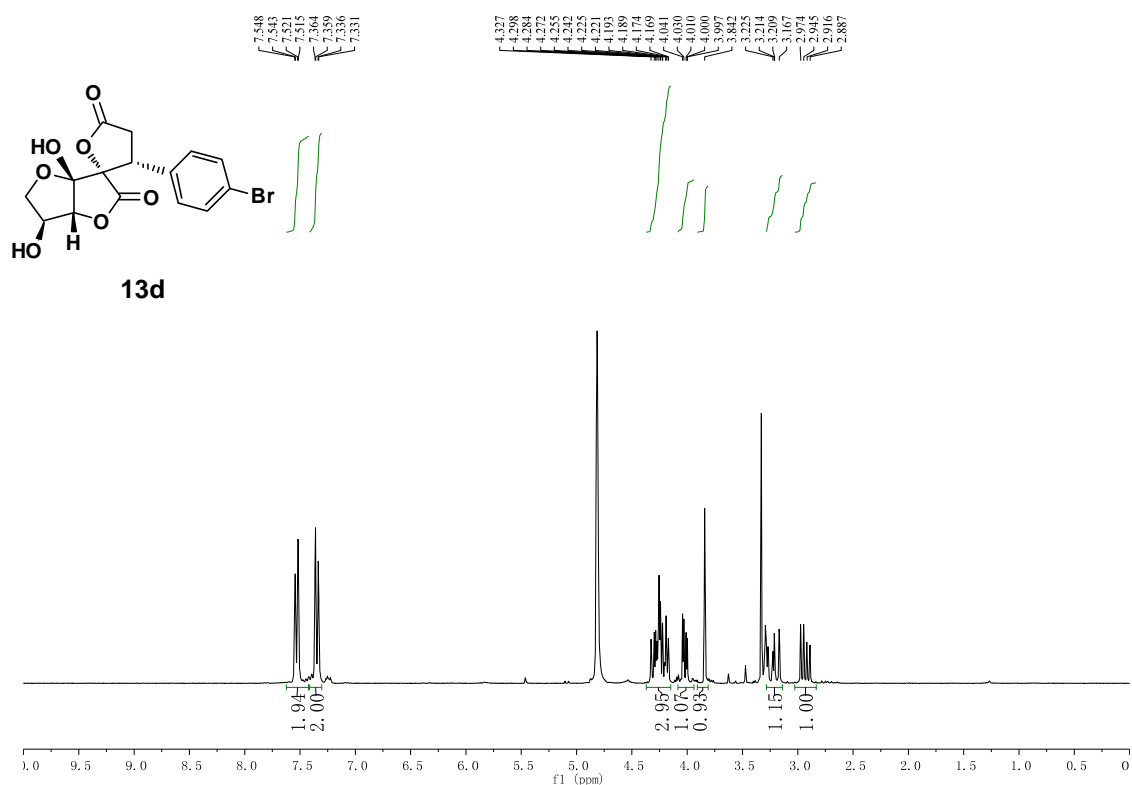

<sup>1</sup>H NMR Spectrum for **13d** (300 MHz, CD<sub>3</sub>OD)

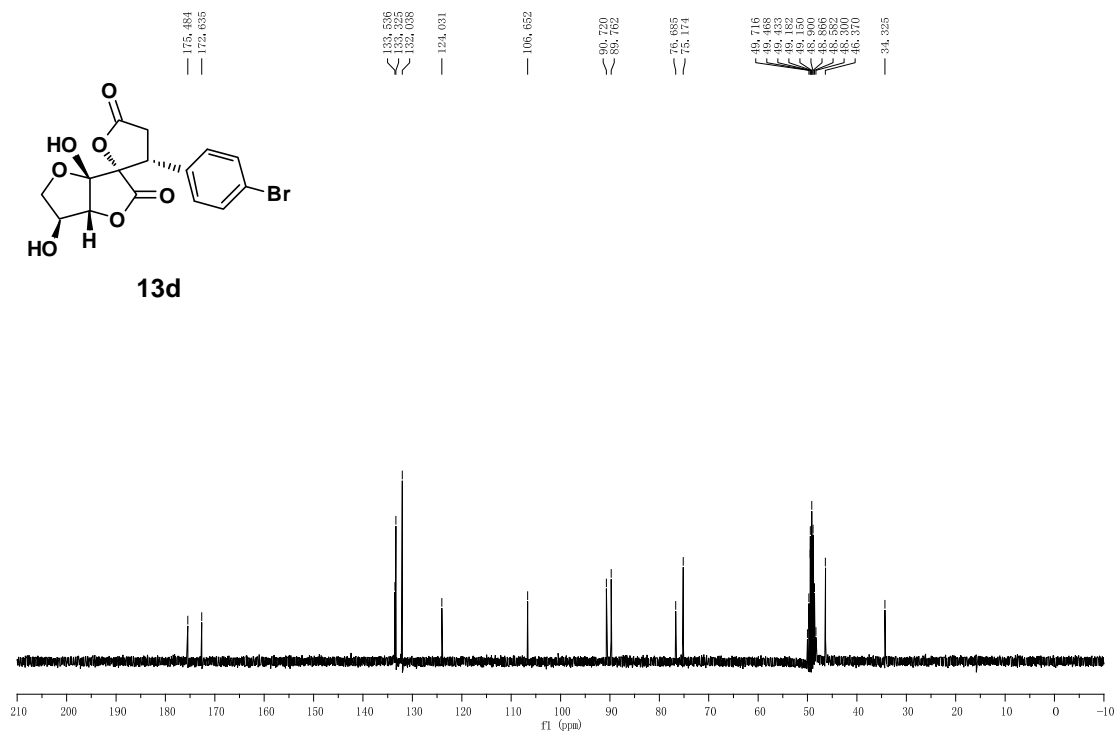

<sup>13</sup>C NMR Spectrum for **13d** (75 MHz, CD<sub>3</sub>OD)

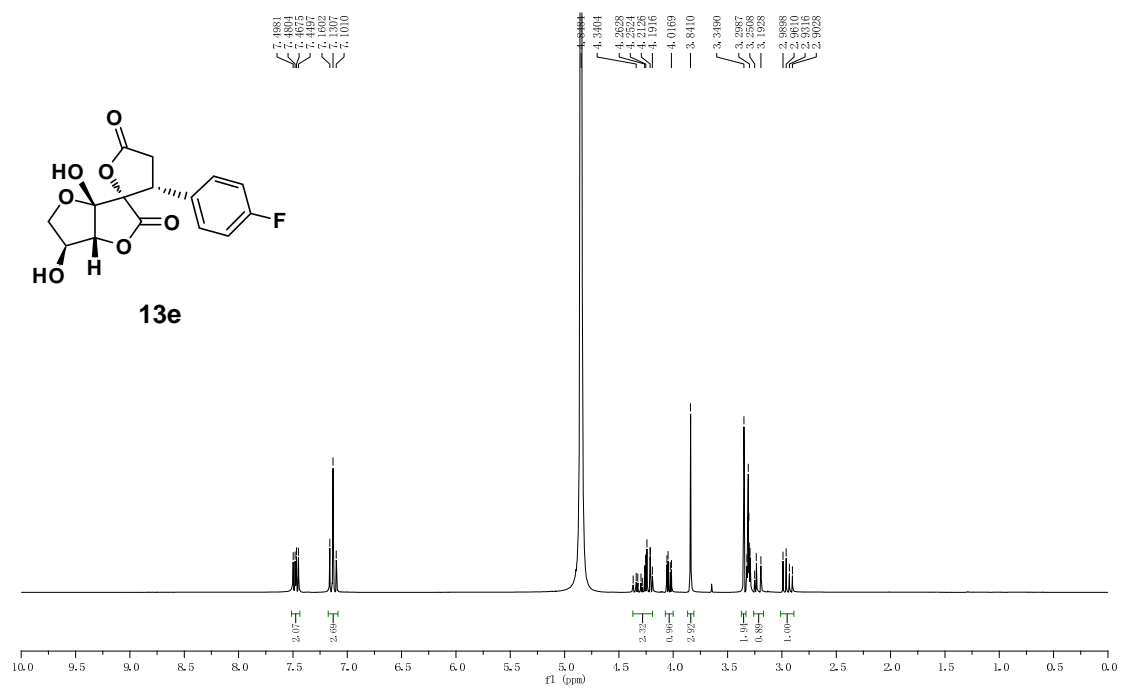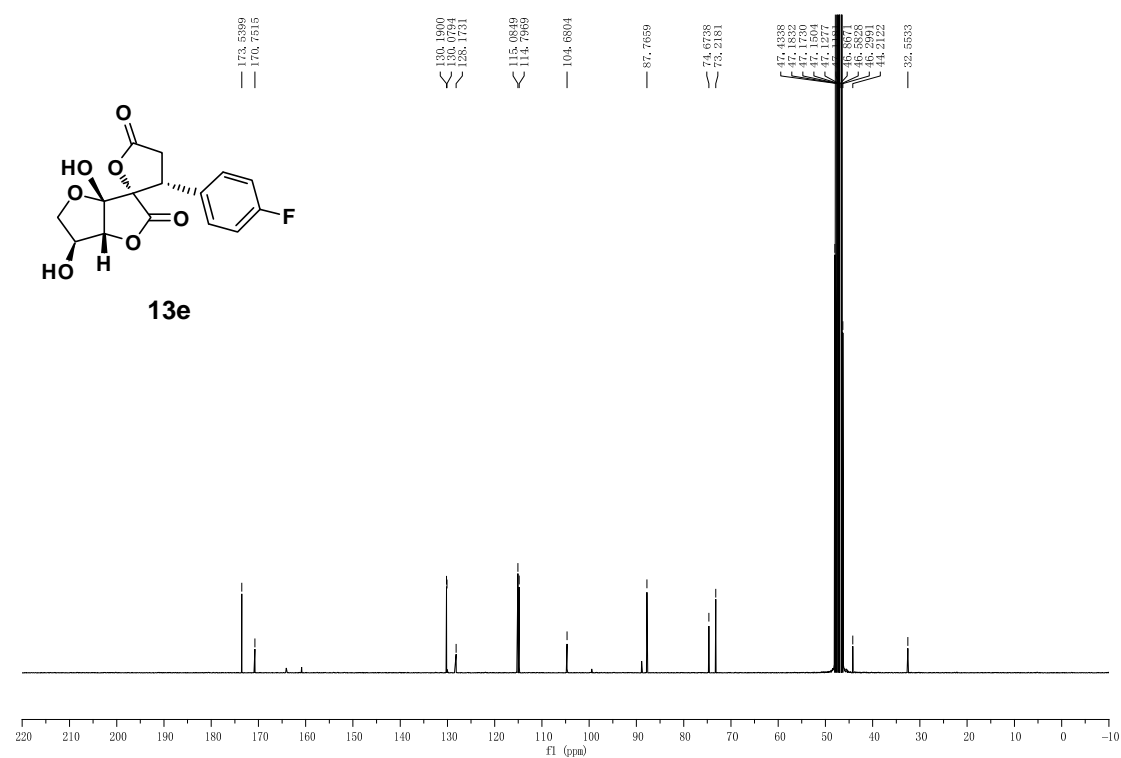



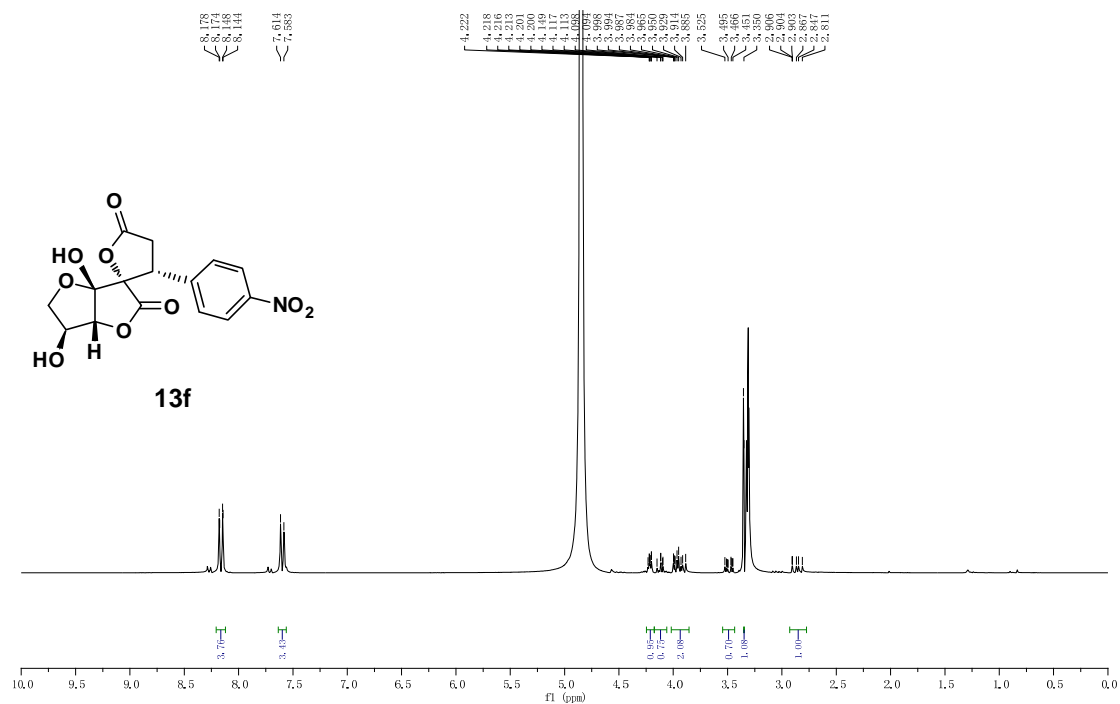

<sup>1</sup>H NMR Spectrum for **13f** (300 MHz, CD<sub>3</sub>OD)

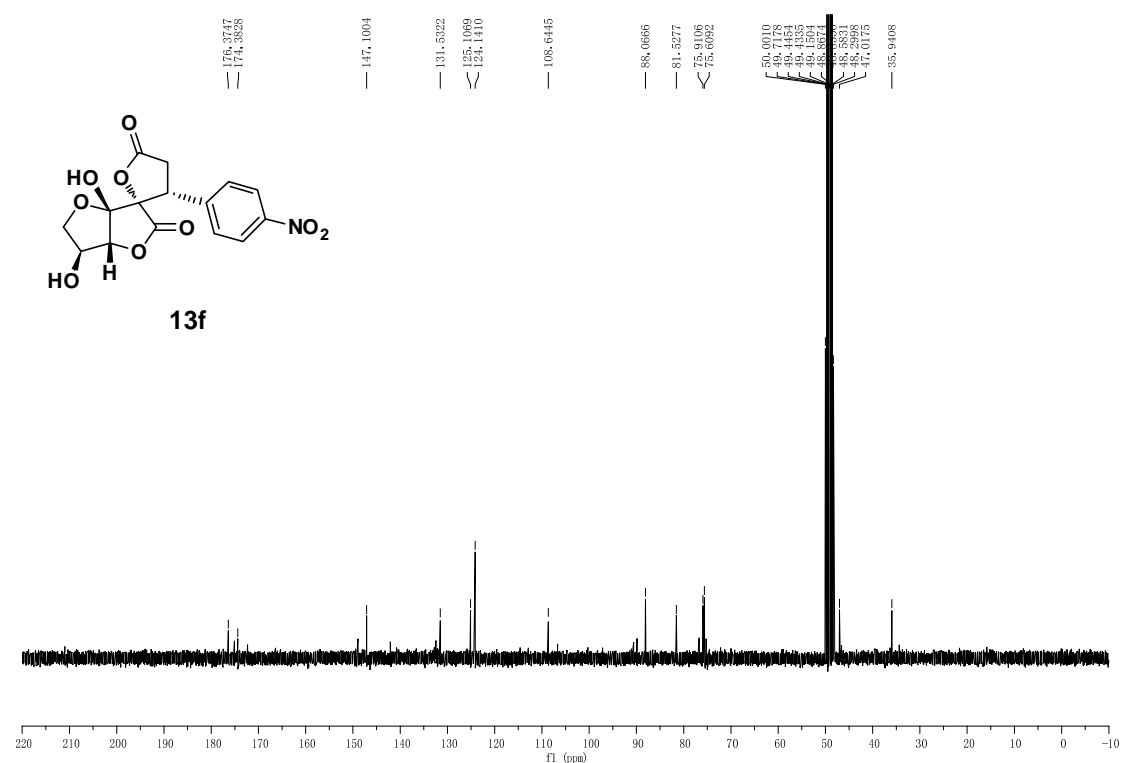

<sup>13</sup>C NMR Spectrum for **13f** (75 MHz, CD<sub>3</sub>OD)

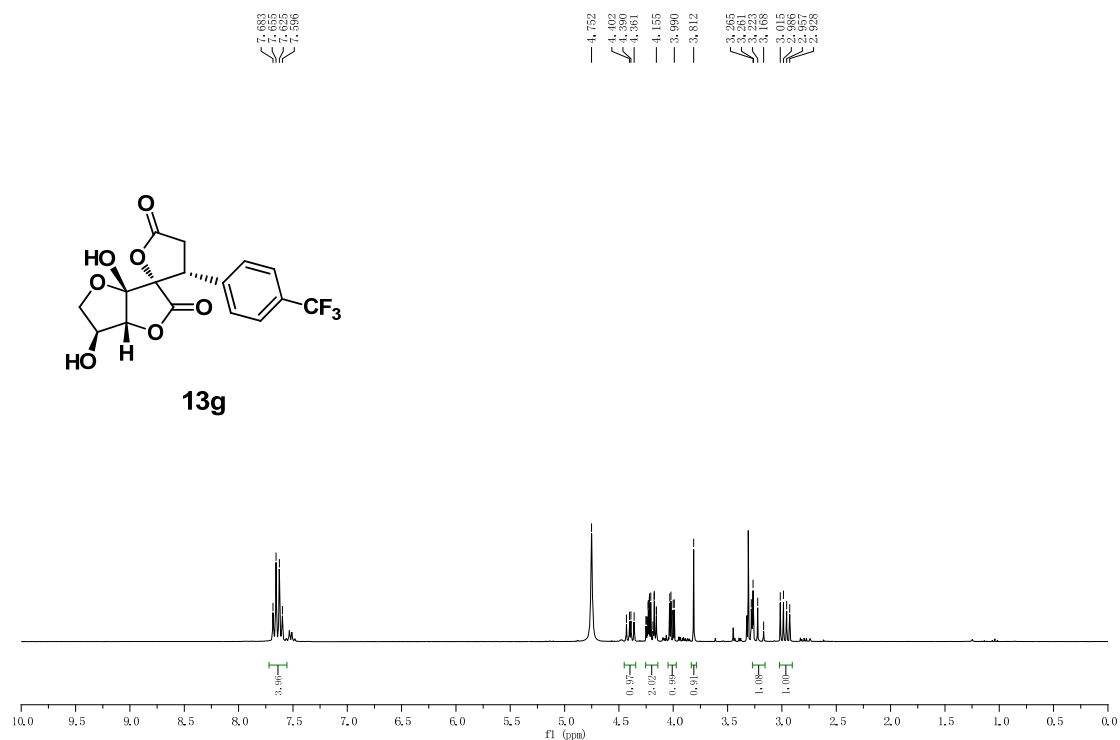

<sup>1</sup>H NMR Spectrum for **13g** (300 MHz, CD<sub>3</sub>OD)

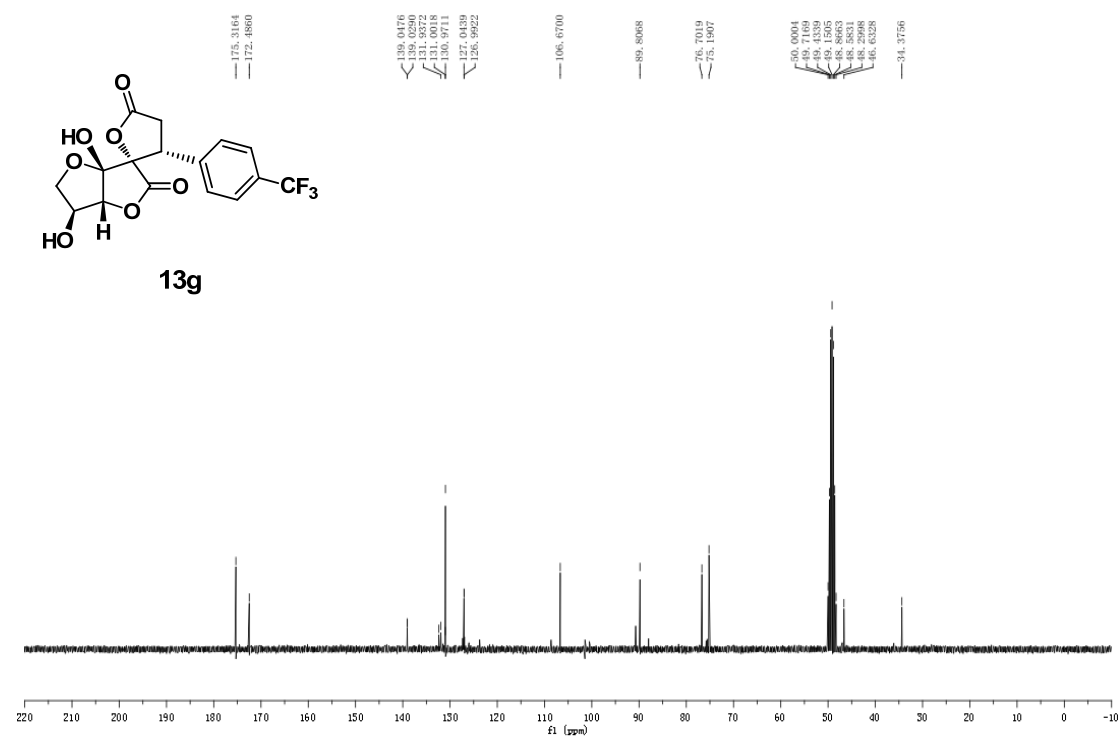

<sup>13</sup>C NMR Spectrum for **13g** (75 MHz, CD<sub>3</sub>OD)

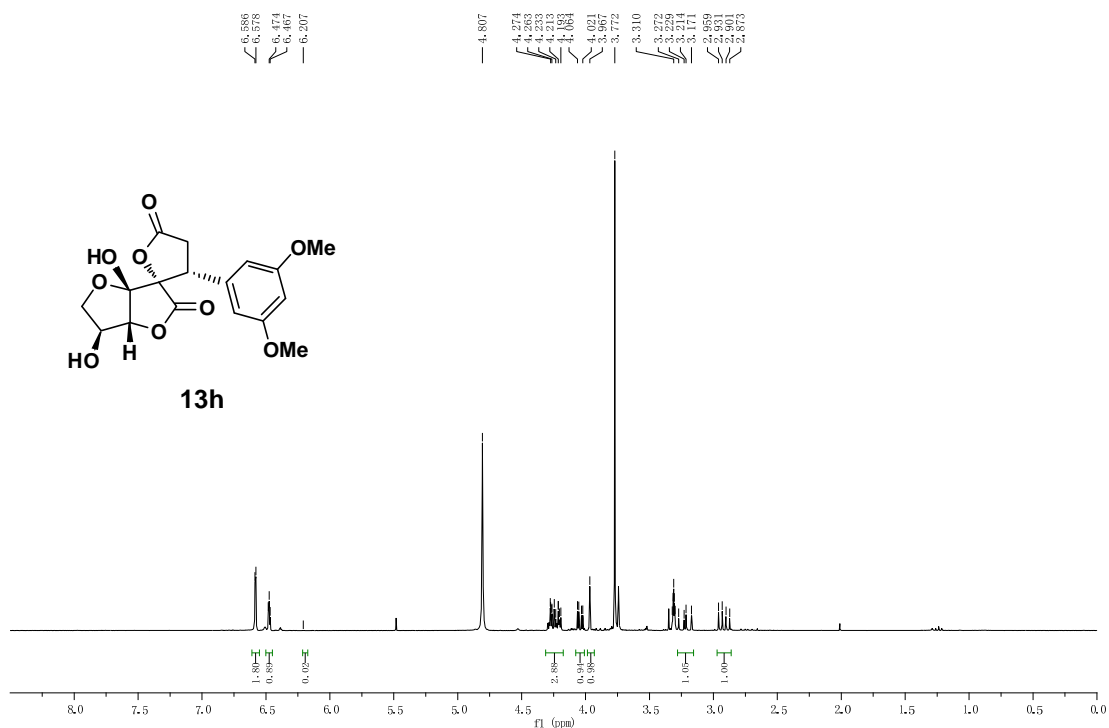

**<sup>1</sup>H NMR Spectrum for 13h (300 MHz, CD<sub>3</sub>OD)**

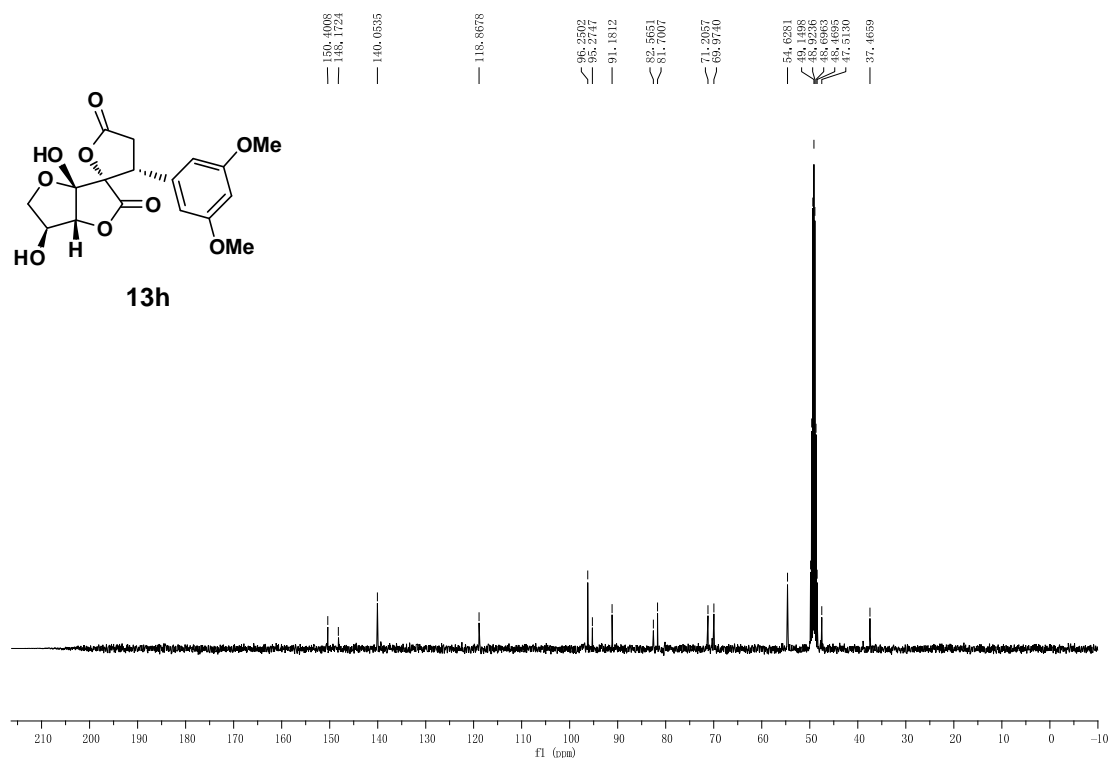

**<sup>13</sup>C NMR Spectrum for 13h (75 MHz, CD<sub>3</sub>OD)**

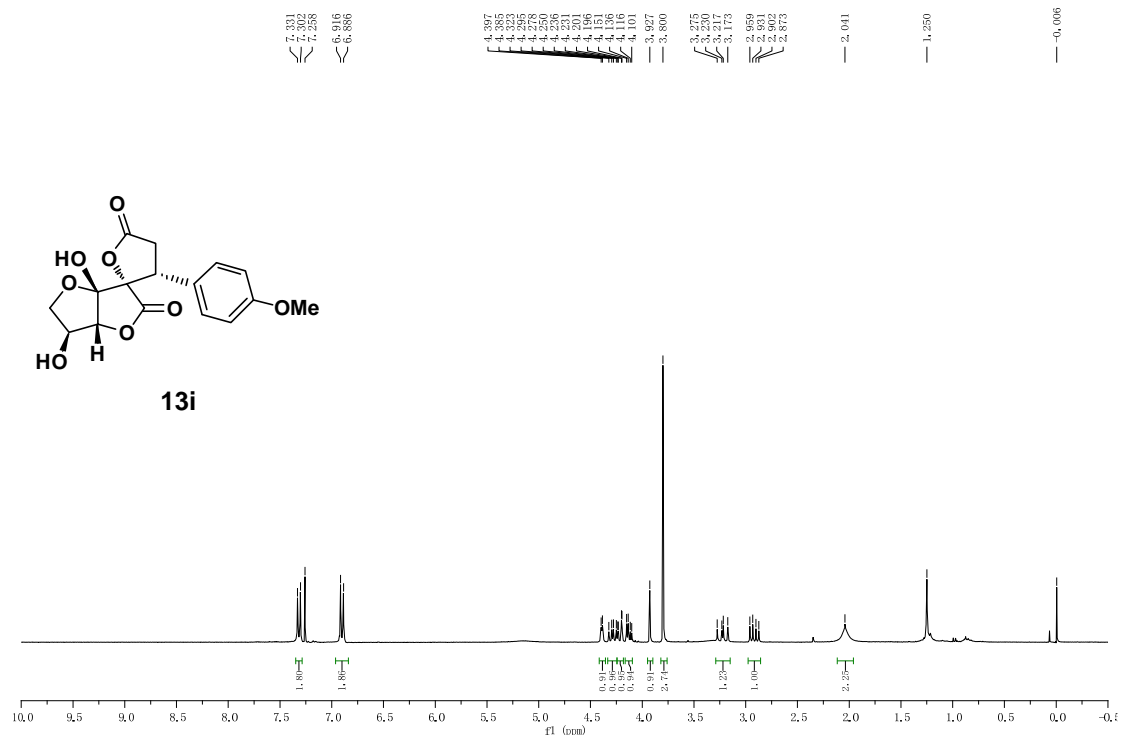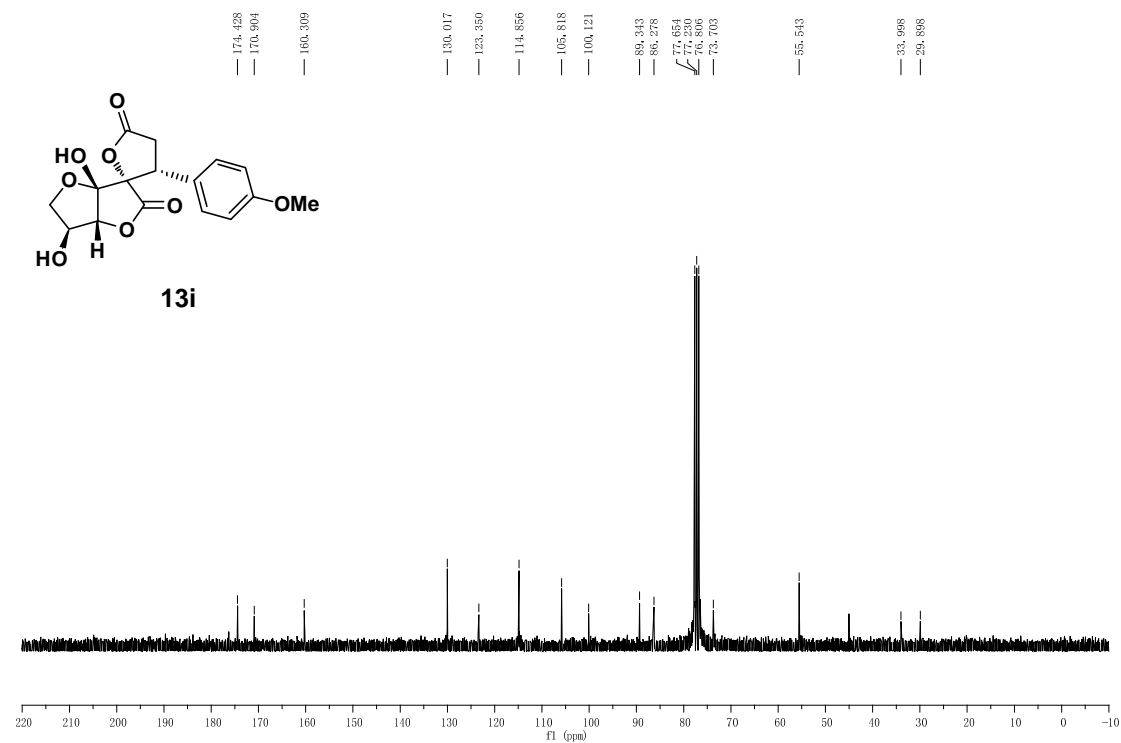

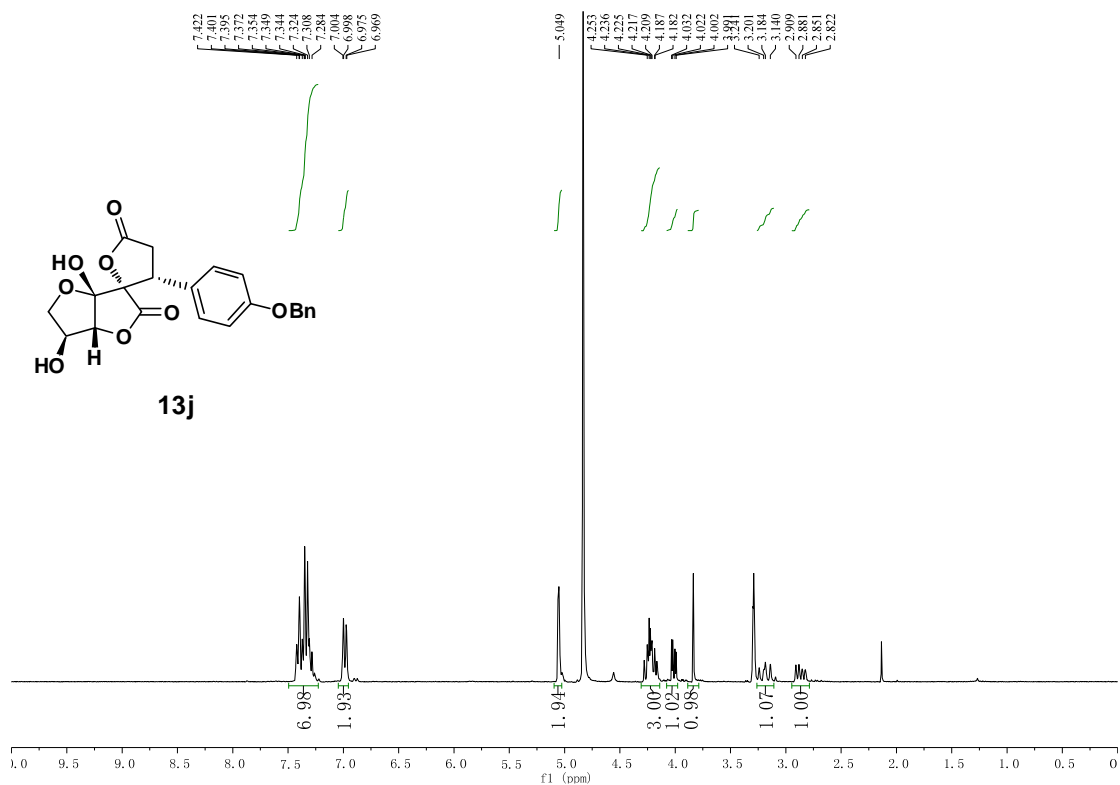

<sup>1</sup>H NMR Spectrum for **13j** (300 MHz, CD<sub>3</sub>OD)

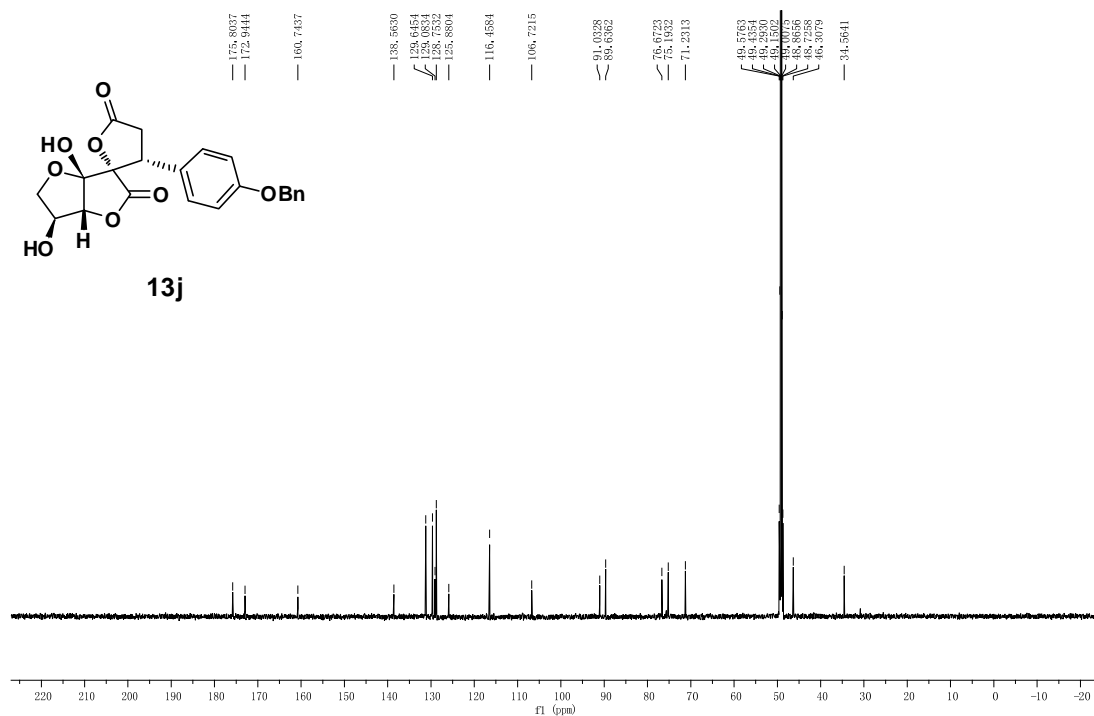

<sup>13</sup>C NMR Spectrum for **13j** (75 MHz, CD<sub>3</sub>OD)

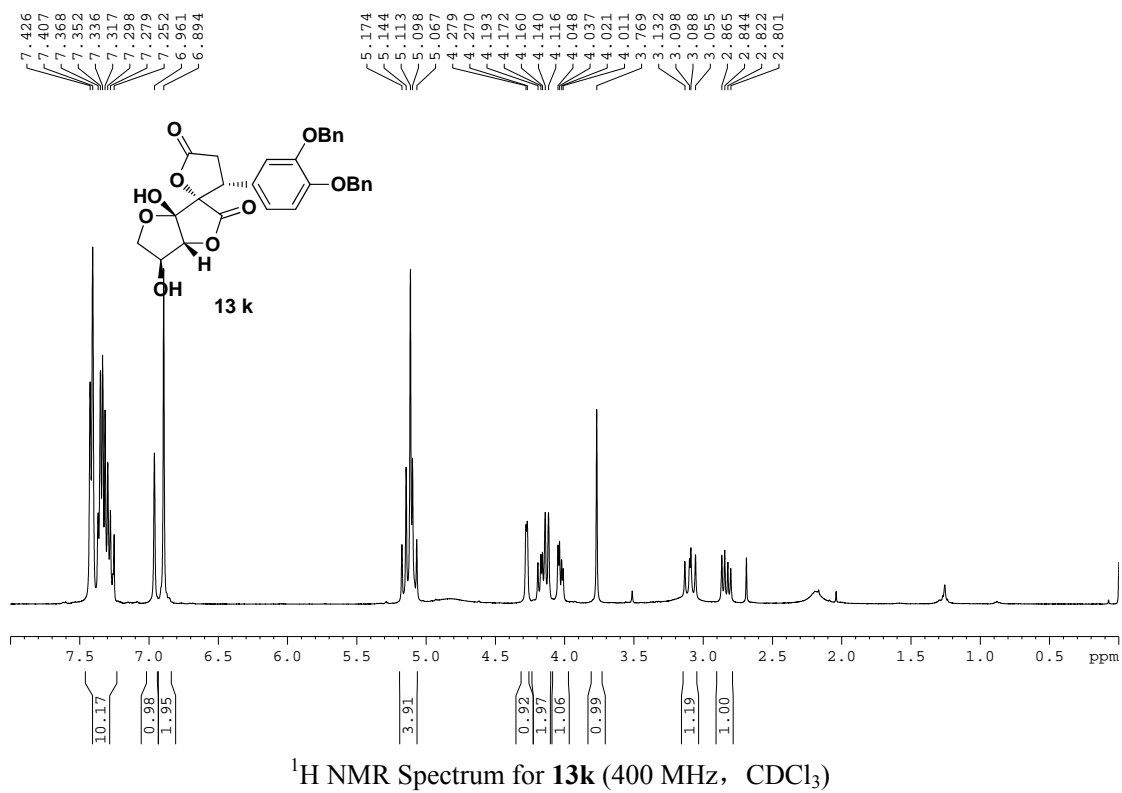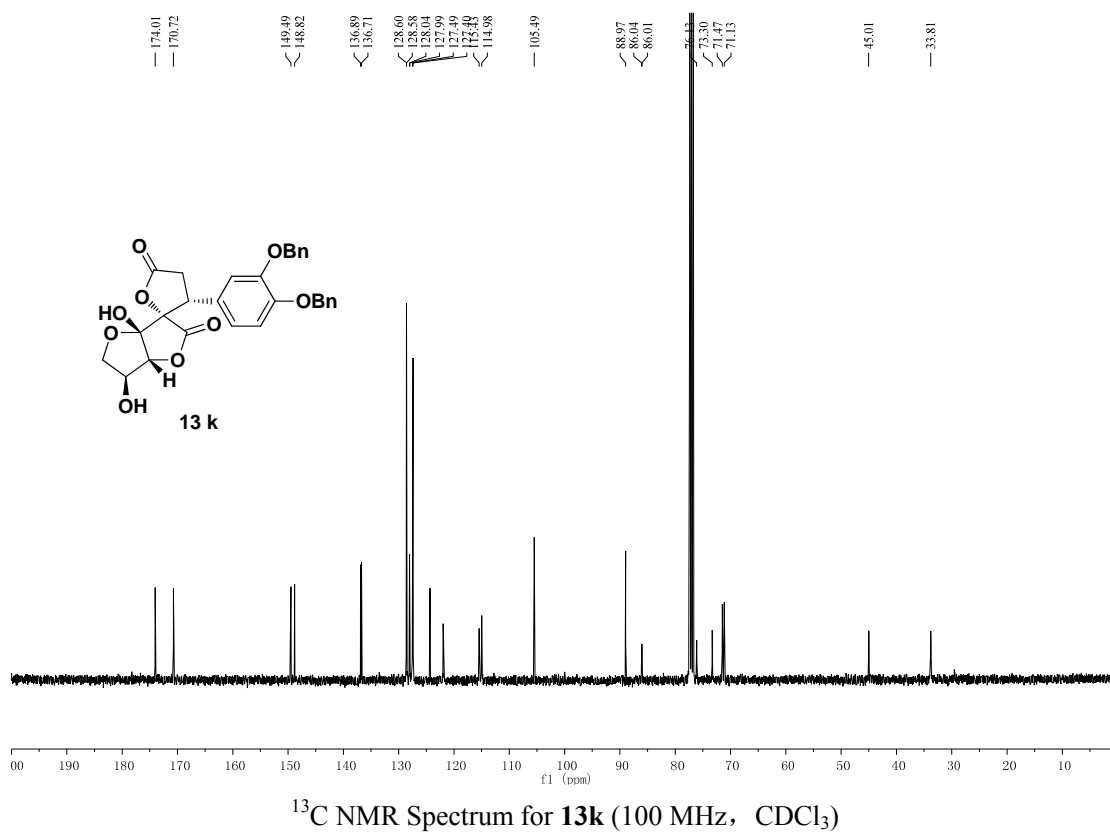

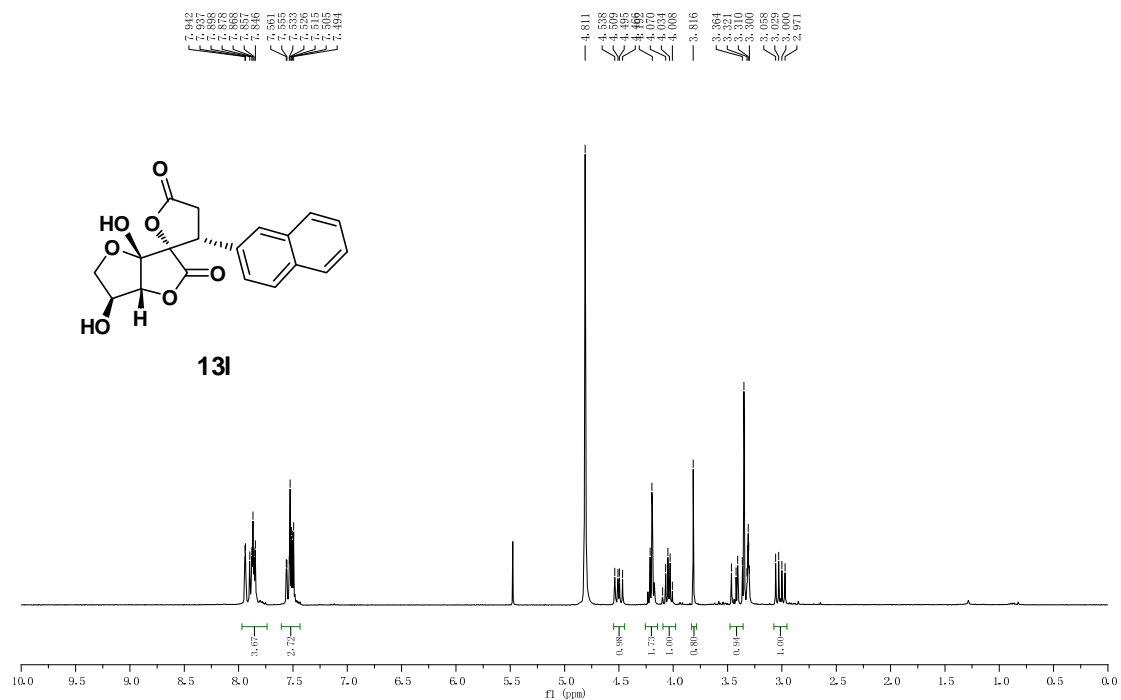

$^1\text{H}$  NMR Spectrum for **13I** (300 MHz,  $\text{CD}_3\text{OD}$ )

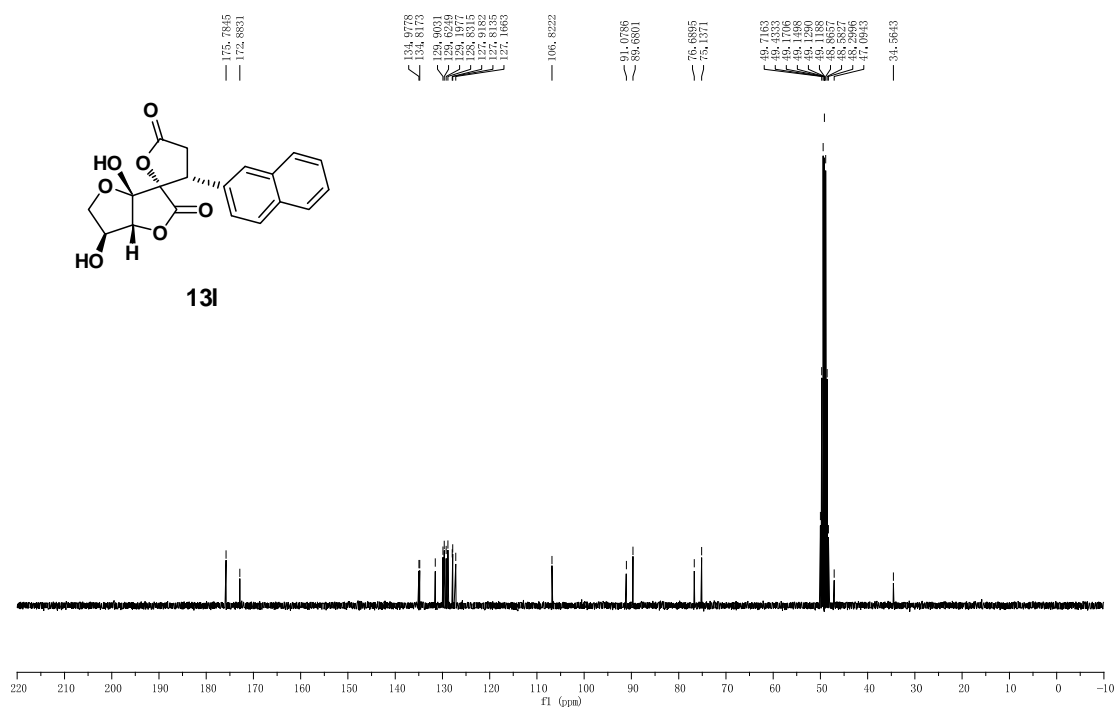

$^{13}\text{C}$  NMR Spectrum for **13I** (75 MHz,  $\text{CD}_3\text{OD}$ )

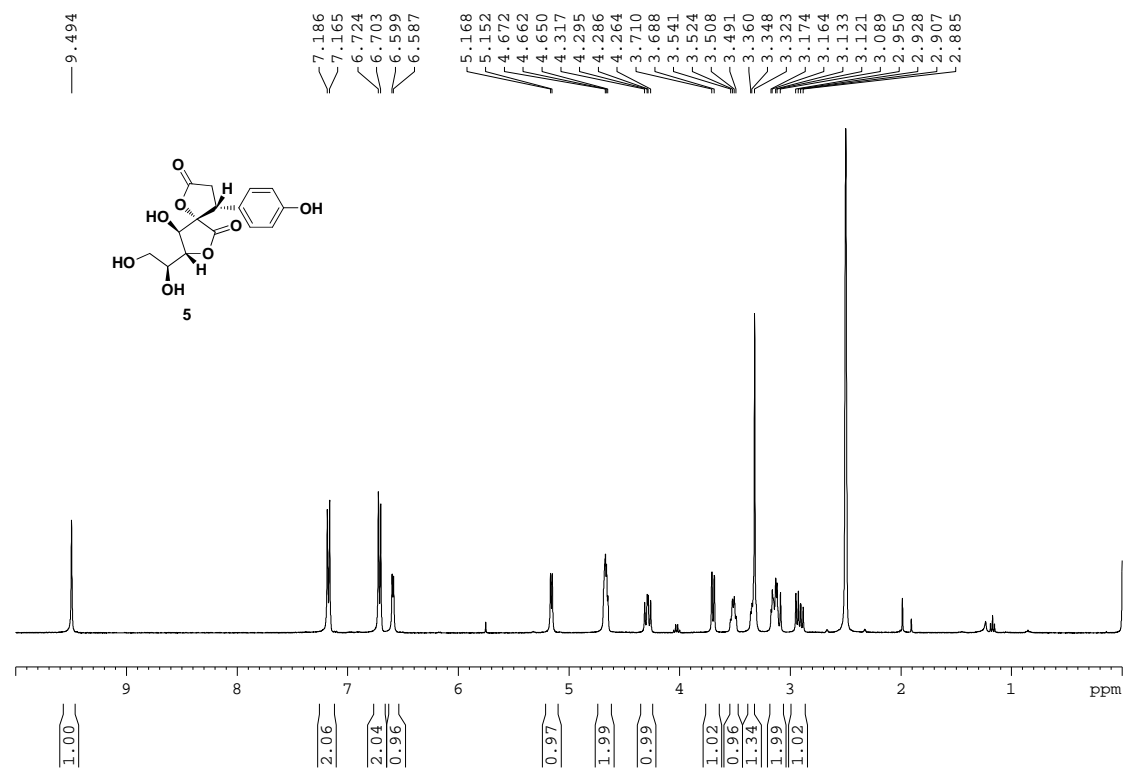

<sup>1</sup>H NMR Spectrum for **5** (400 MHz, DMSO-d<sub>6</sub>)

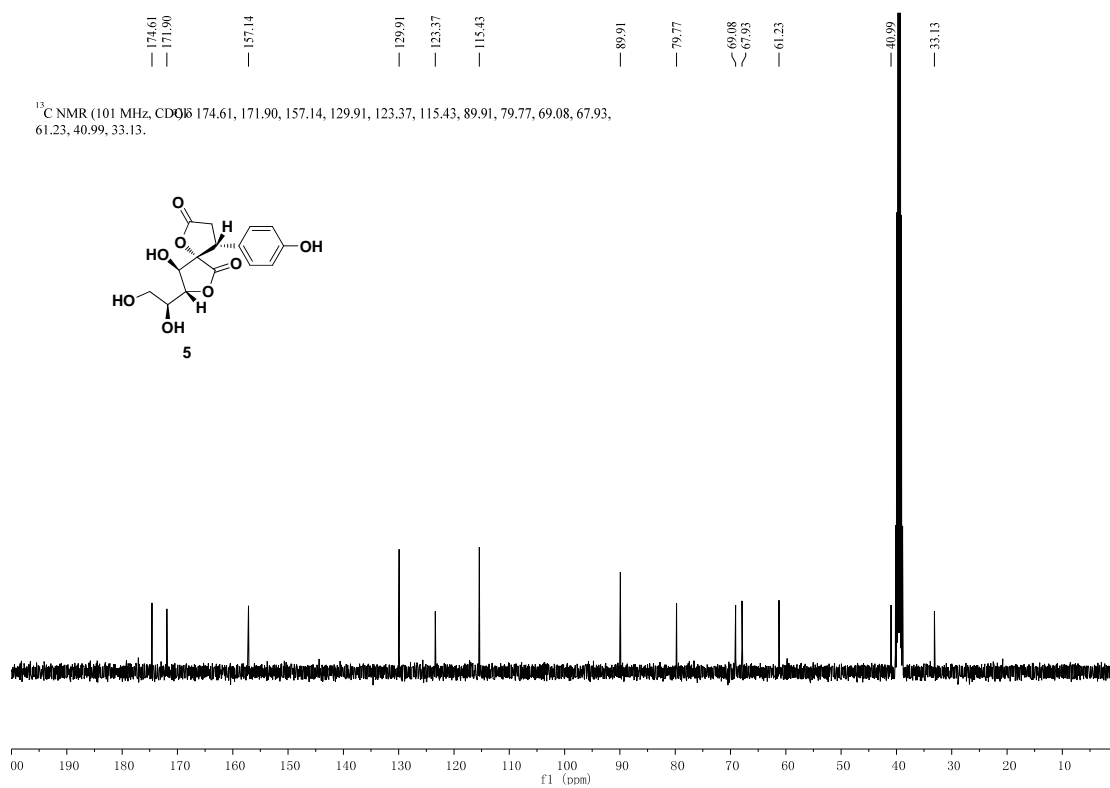

<sup>13</sup>C NMR (101 MHz, DMSO-d<sub>6</sub>) 174.61, 171.90, 157.14, 129.91, 123.37, 115.43, 89.91, 79.77, 69.08, 67.93, 61.23, 40.99, 33.13.

<sup>13</sup>C NMR Spectrum for **5** (100 MHz, DMSO-d<sub>6</sub>)



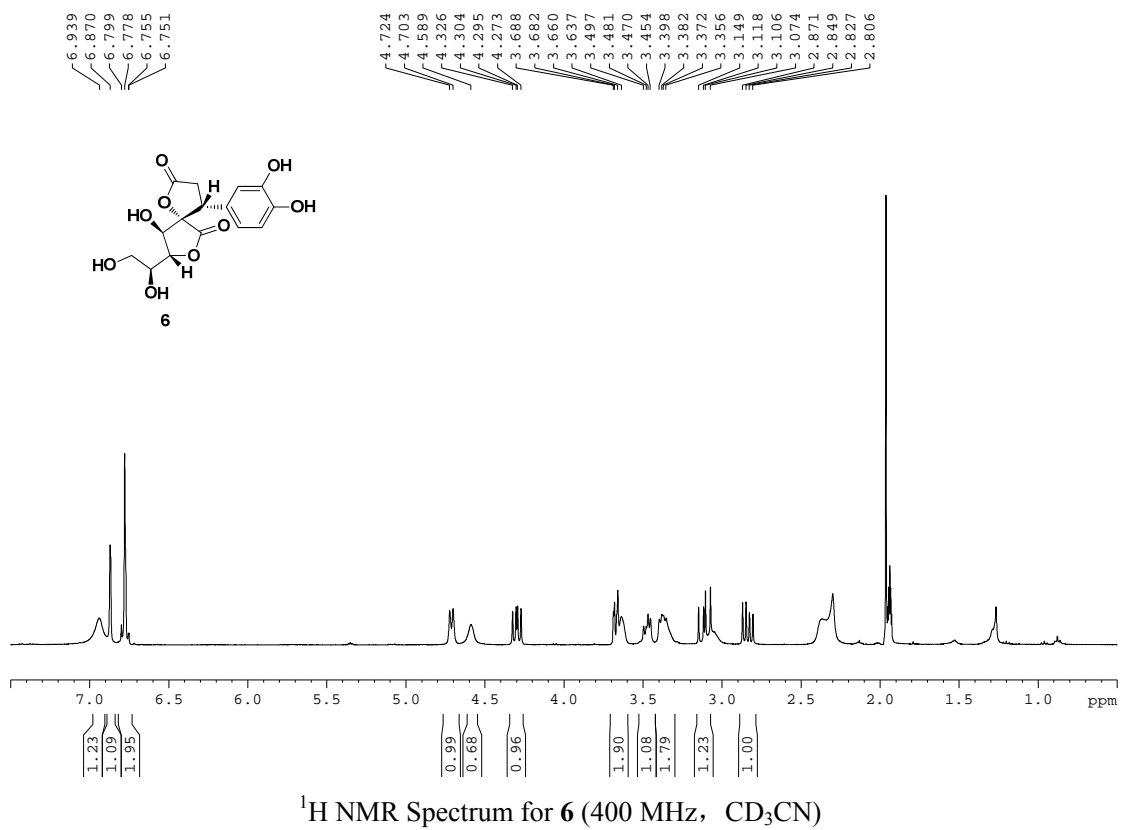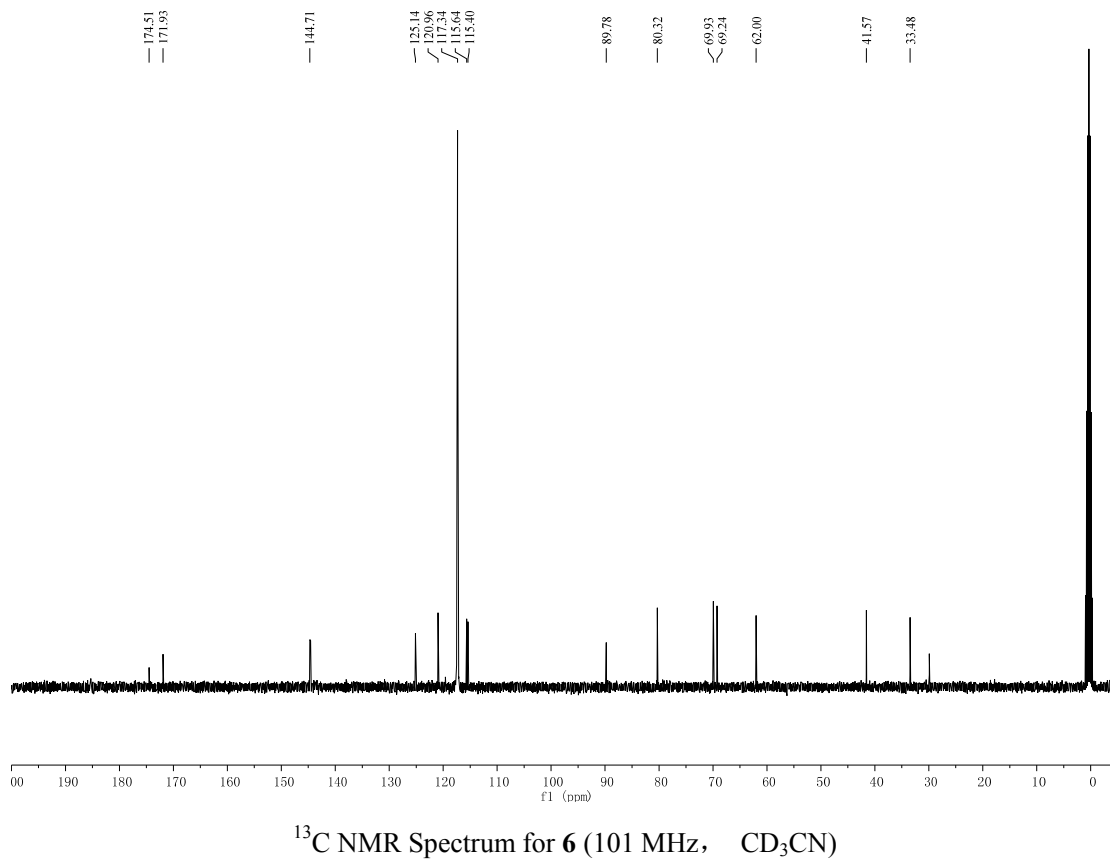

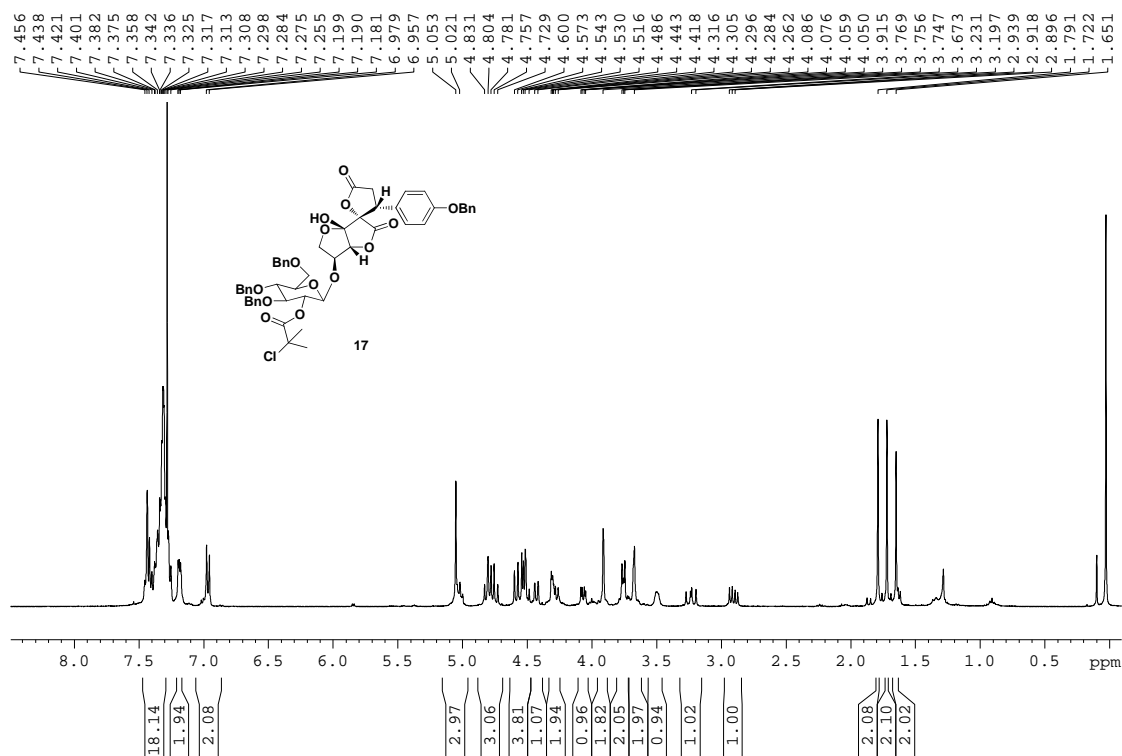

<sup>1</sup>H NMR Spectrum for **17** (400 MHz, CDCl<sub>3</sub>)

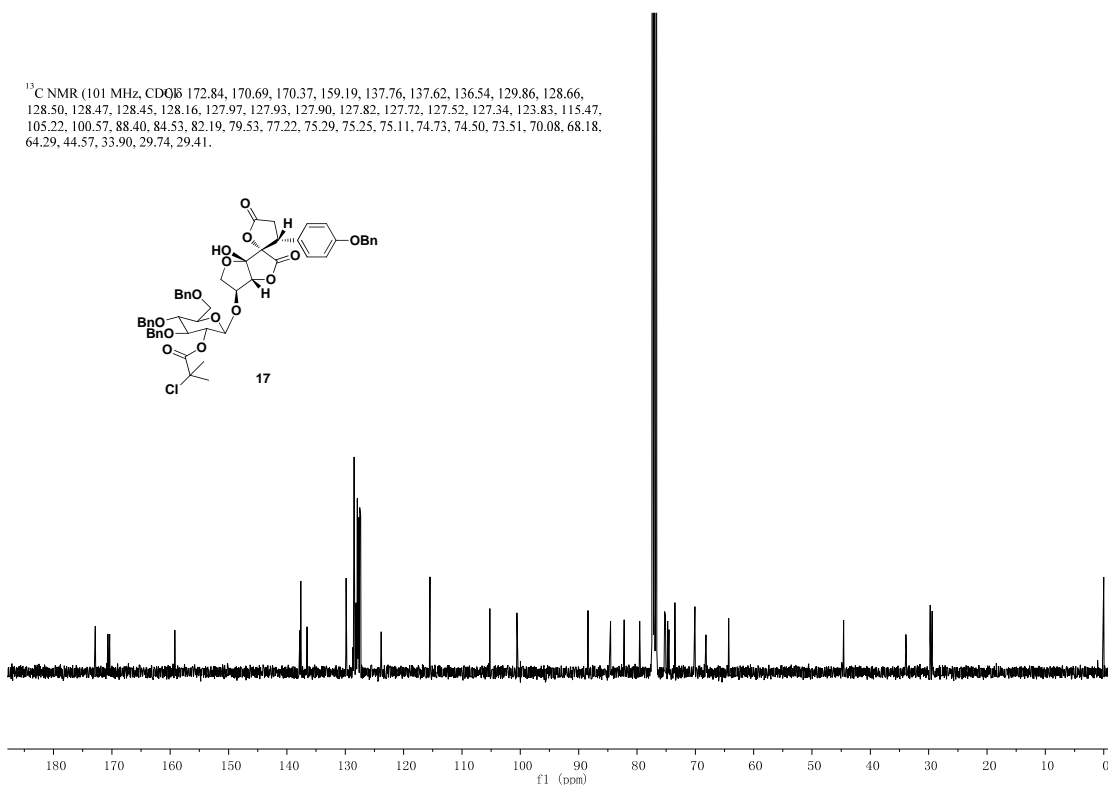

<sup>13</sup>C NMR Spectrum for **17** (100 MHz, CDCl<sub>3</sub>)

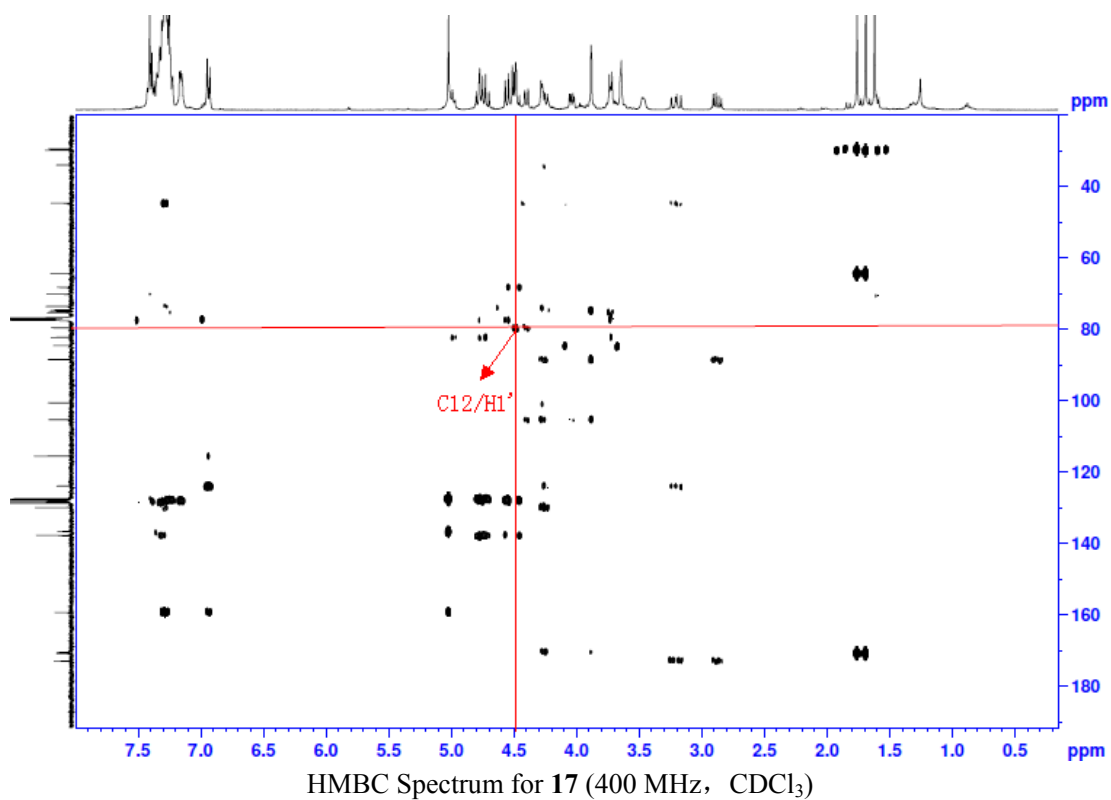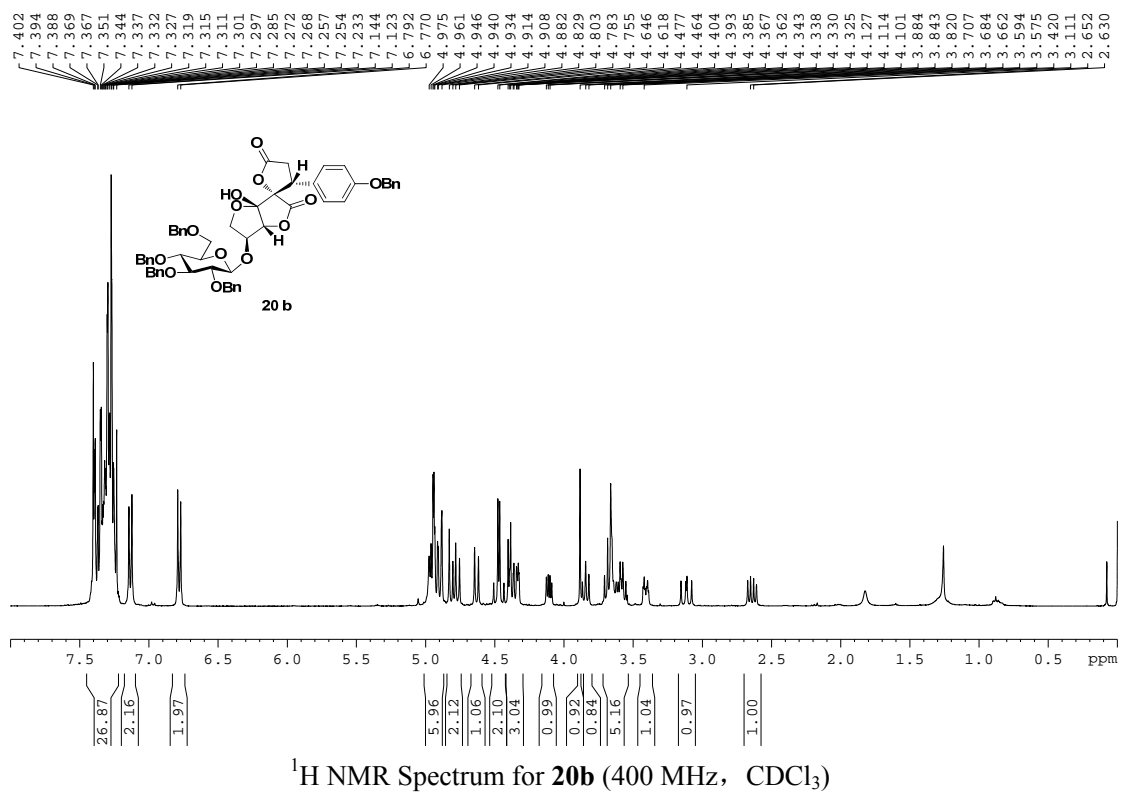

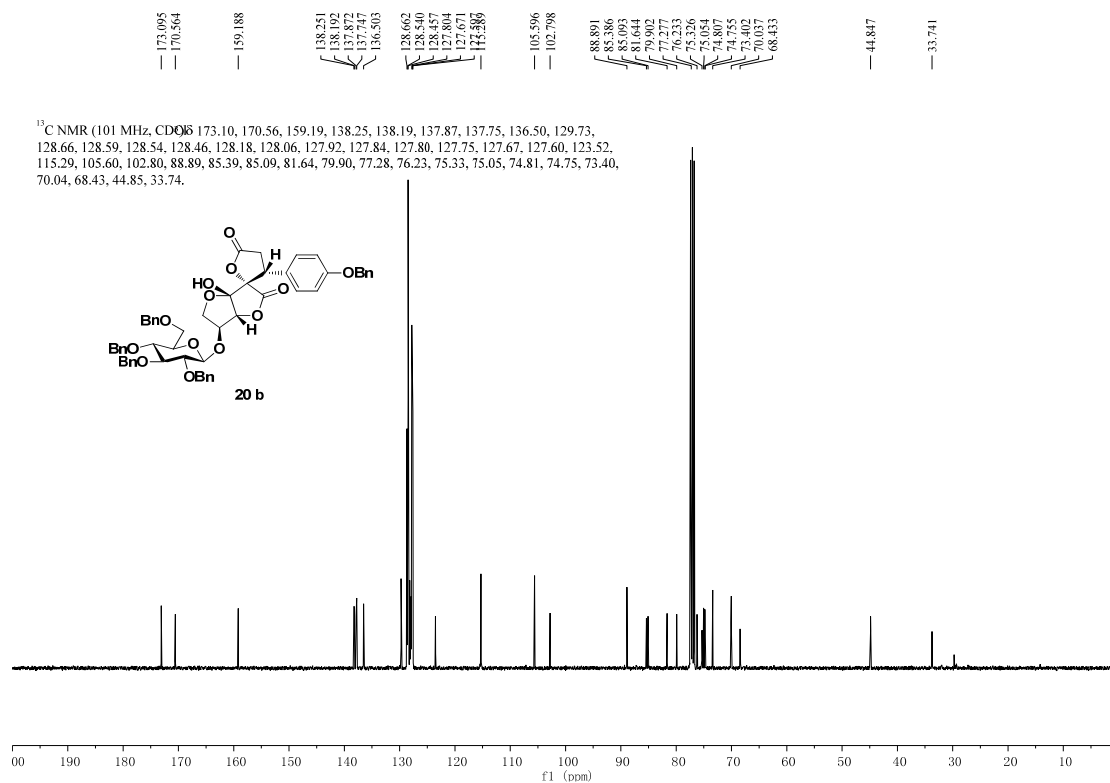

<sup>13</sup>C NMR Spectrum for **20b** (101 MHz, CDCl<sub>3</sub>)

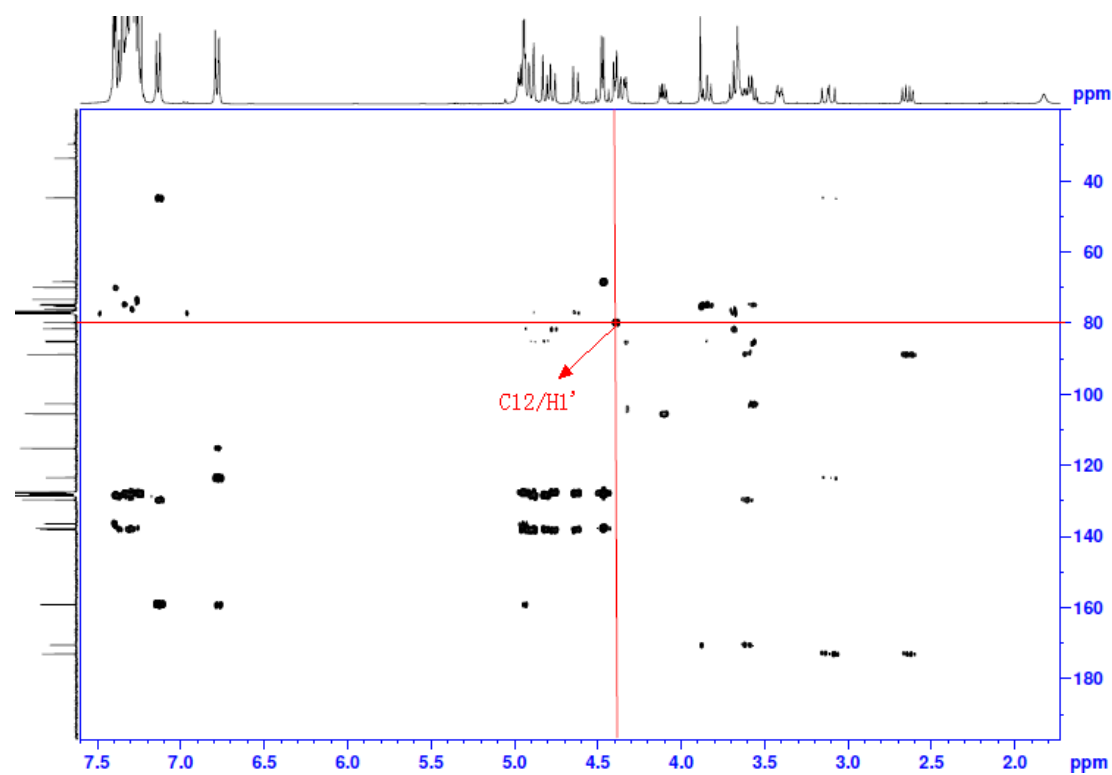

HMBC Spectrum for **20b** (400 MHz, CDCl<sub>3</sub>)

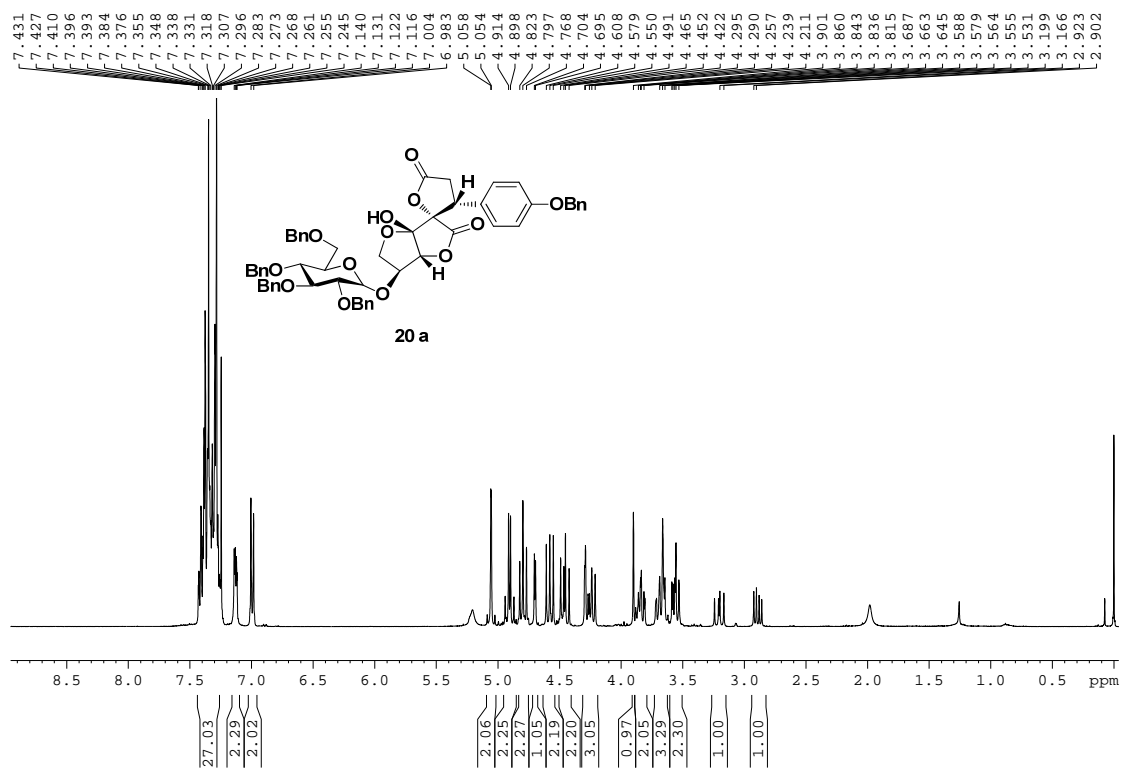

<sup>1</sup>H NMR Spectrum for **20a** (400 MHz, CDCl<sub>3</sub>)

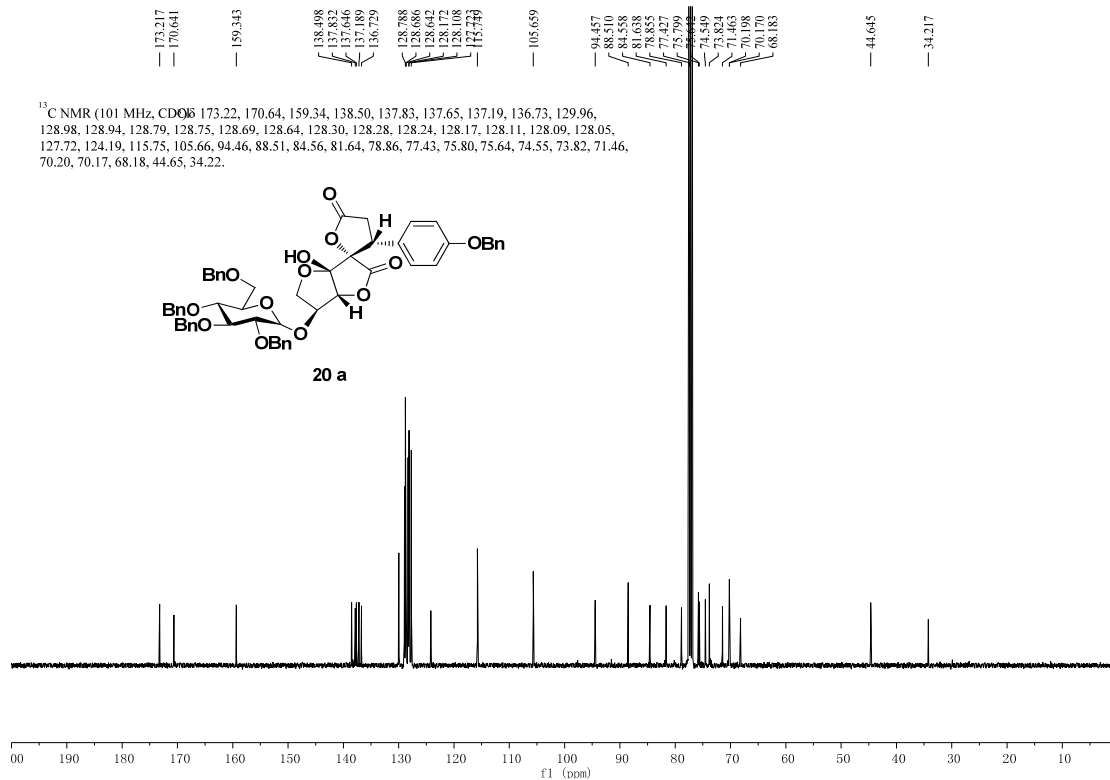

<sup>13</sup>C NMR Spectrum for **20a** (400 MHz, CDCl<sub>3</sub>)

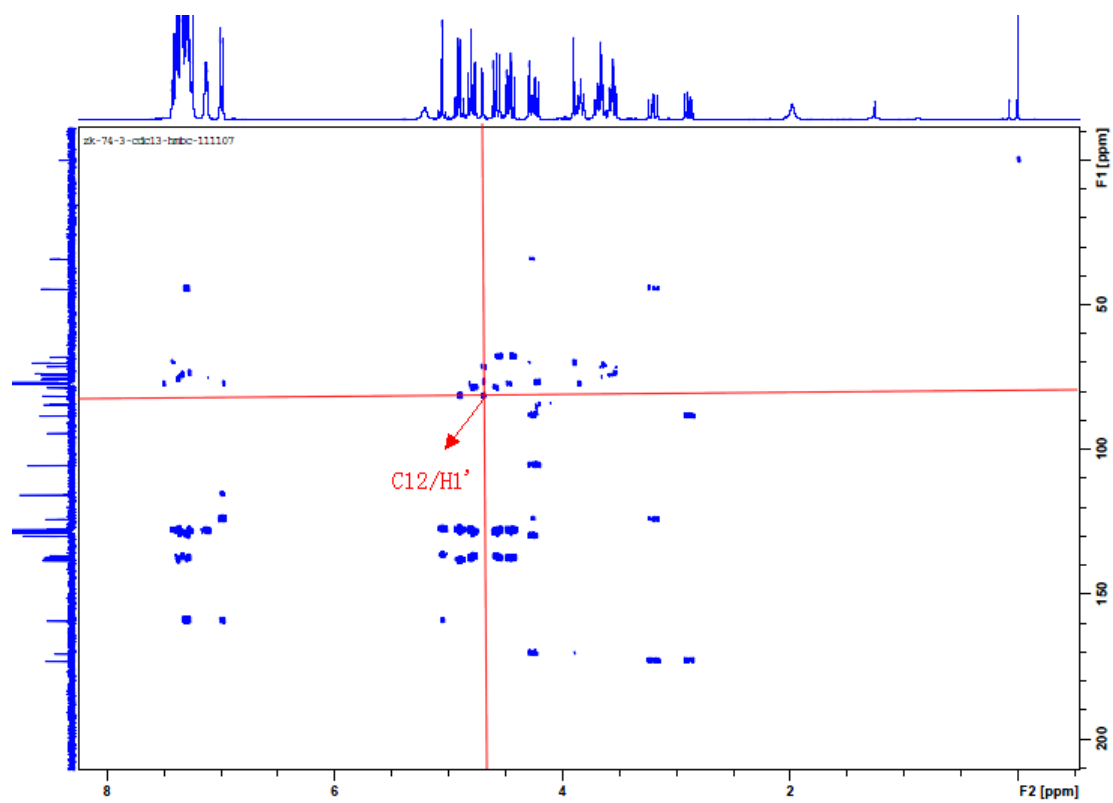

HMBC Spectrum for **20a** (400 MHz, CDCl<sub>3</sub>)

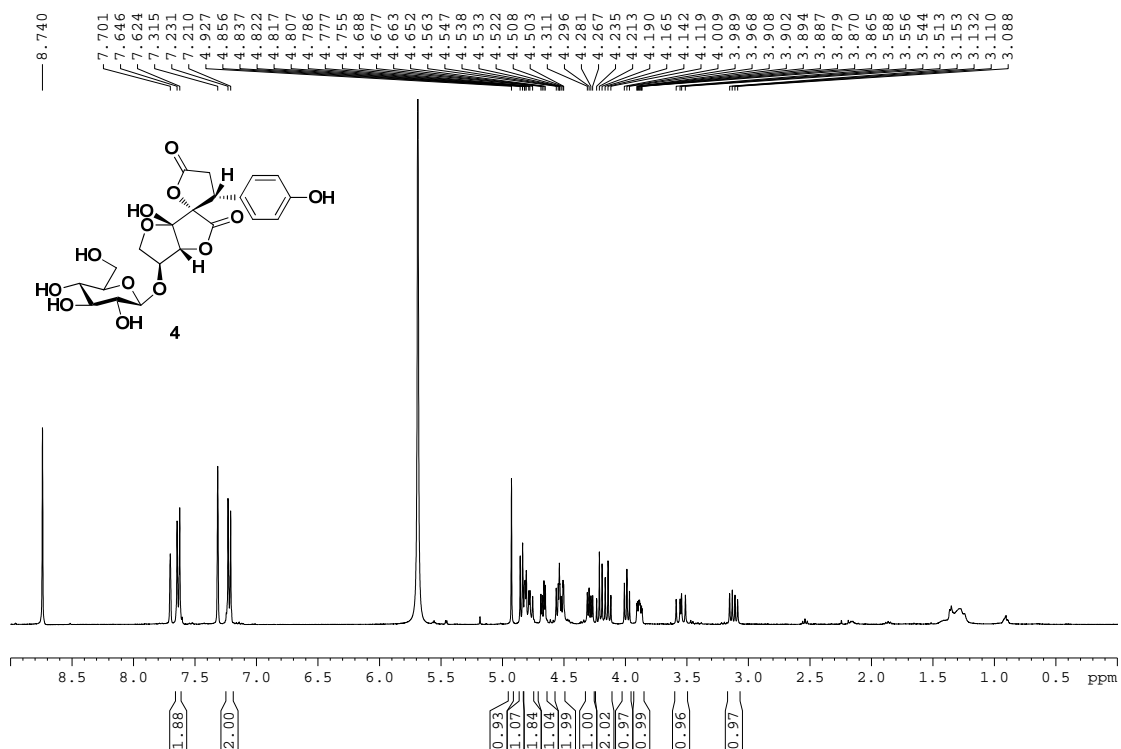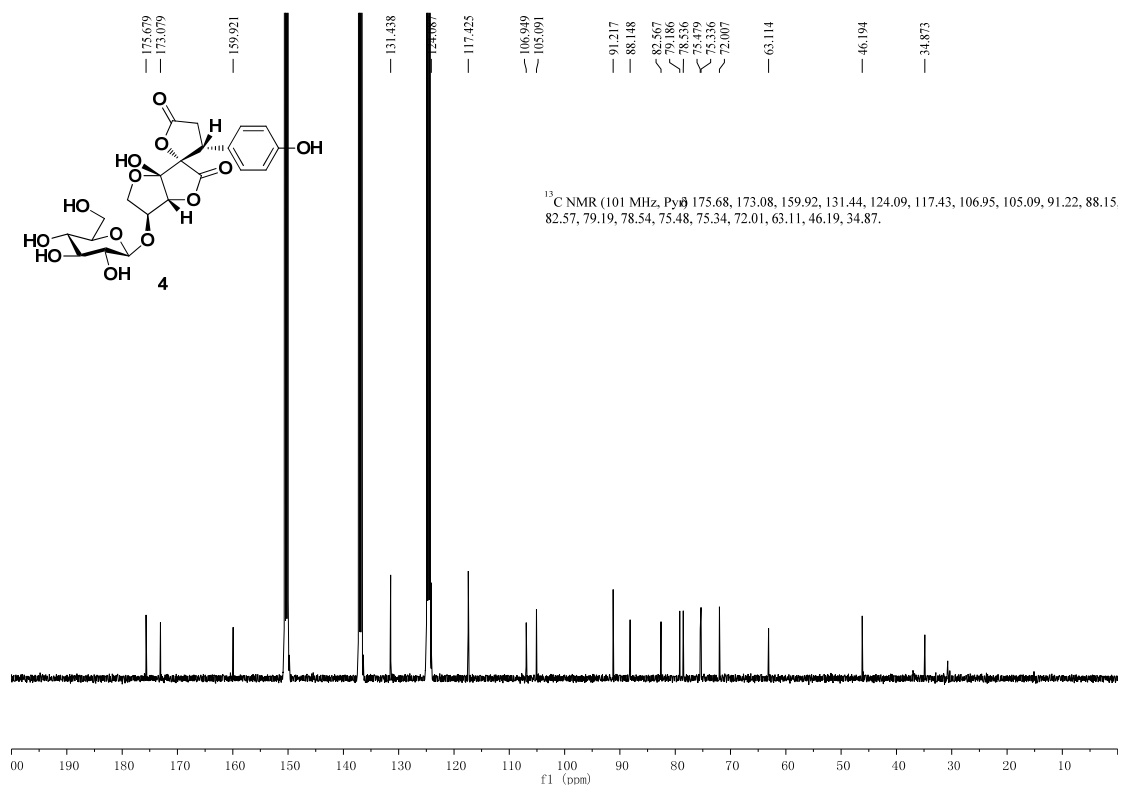

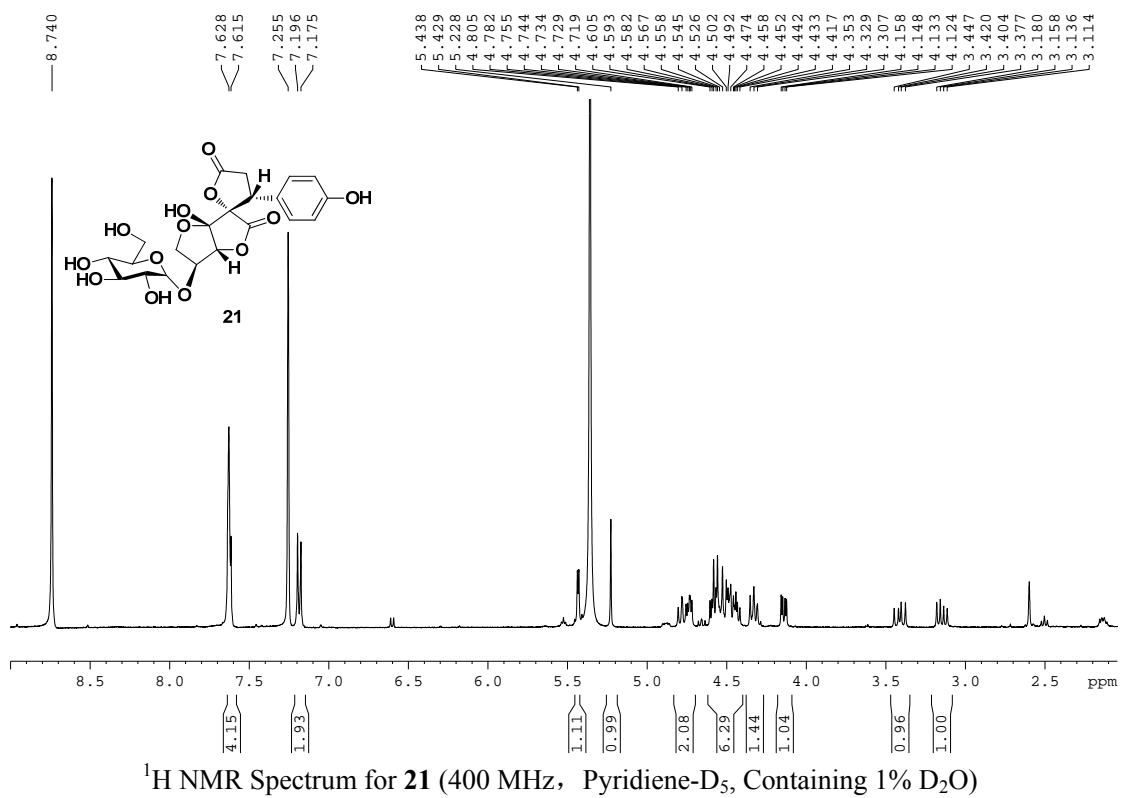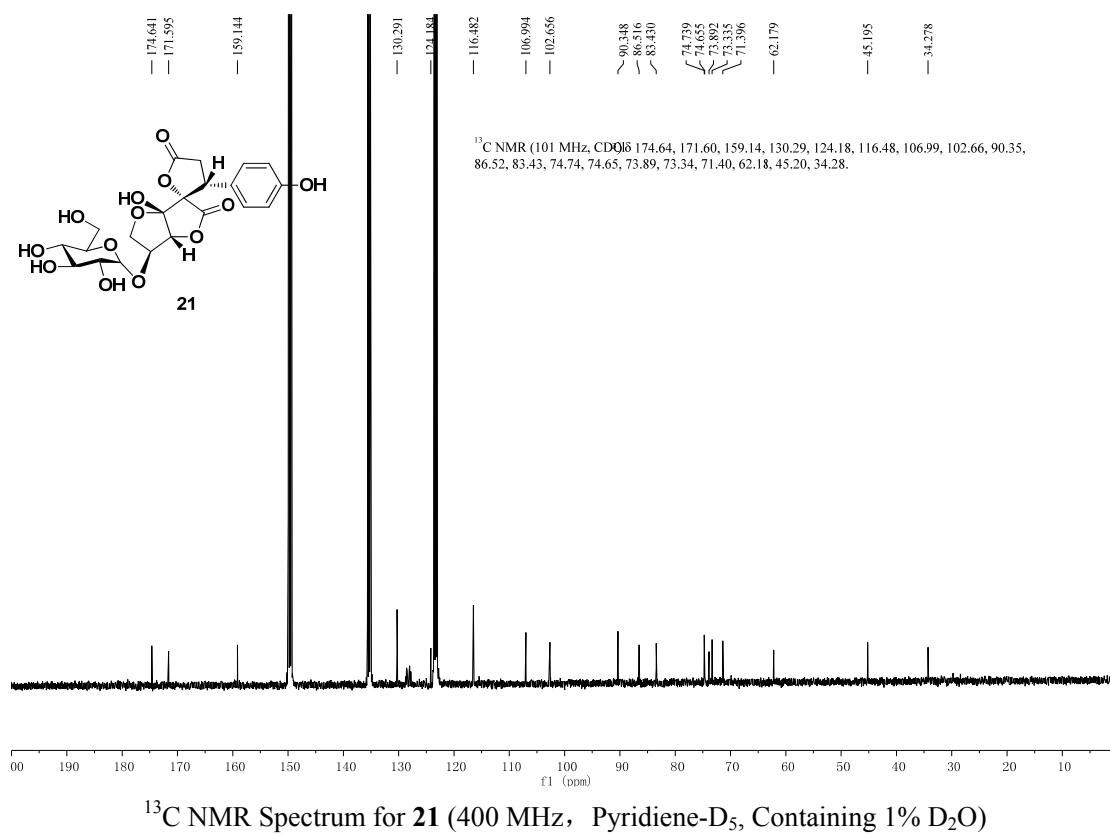



## Part 6: X-ray Crystallographic Studies for 12j

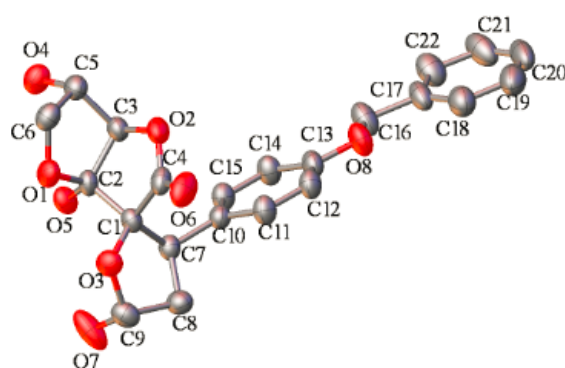

**Table 1.** Crystal data and structure refinement for 12j

|                                   |                                                                                                                    |
|-----------------------------------|--------------------------------------------------------------------------------------------------------------------|
| Identification code               | 12j                                                                                                                |
| Empirical formula                 | C <sub>22</sub> H <sub>22</sub> O <sub>8</sub>                                                                     |
| Formula weight                    | 414.40                                                                                                             |
| Temperature                       | 173(2) K                                                                                                           |
| Wavelength                        | 0.71073 Å                                                                                                          |
| Crystal system, space group       | Monoclinic, P2(1)                                                                                                  |
| Unit cell dimensions              | a = 6.690(2) Å    alpha = 90 deg.<br>b = 7.080(2) Å    beta = 95.955(5) deg.<br>c = 20.692(6) Å    gamma = 90 deg. |
| Volume                            | 974.7(5) Å <sup>3</sup>                                                                                            |
| Z, Calculated density             | 2, 1.412 Mg/m <sup>3</sup>                                                                                         |
| Absorption coefficient            | 0.108 mm <sup>-1</sup>                                                                                             |
| F(000)                            | 436                                                                                                                |
| Crystal size                      | 0.50 x 0.38 x 0.09 mm                                                                                              |
| Theta range for data collection   | 2.97 to 27.46 deg.                                                                                                 |
| Limiting indices                  | -7<=h<=8, -9<=k<=9, -22<=l<=26                                                                                     |
| Reflections collected / unique    | 7441 / 2407 [R(int) = 0.0419]                                                                                      |
| Completeness to theta = 27.46     | 99.4 %                                                                                                             |
| Absorption correction             | Semi-empirical from equivalents                                                                                    |
| Max. and min. transmission        | 1.0000 and 0.6044                                                                                                  |
| Refinement method                 | Full-matrix least-squares on F <sup>2</sup>                                                                        |
| Data / restraints / parameters    | 2407 / 2 / 272                                                                                                     |
| Goodness-of-fit on F <sup>2</sup> | 1.119                                                                                                              |
| Final R indices [I>2sigma(I)]     | R1 = 0.0471, wR2 = 0.0973                                                                                          |
| R indices (all data)              | R1 = 0.0498, wR2 = 0.0992                                                                                          |
| Absolute structure parameter      | 10(10)                                                                                                             |
| Largest diff. peak and hole       | 0.171 and -0.160 e.Å <sup>-3</sup>                                                                                 |

**Table 2.** Atomic coordinates ( $\times 10^4$ ) and equivalent isotropic displacement parameters ( $\text{Å}^2 \times 10^3$ ) for 12j.  
U(eq) is defined as one third of the trace of the orthogonalized Uij tensor.

|       | x        | y       | z       | U(eq) |
|-------|----------|---------|---------|-------|
| O(1)  | 7592(3)  | 4635(3) | 9526(1) | 47(1) |
| O(2)  | 6632(3)  | 5467(3) | 8148(1) | 48(1) |
| O(3)  | 10373(3) | 2581(3) | 8968(1) | 44(1) |
| O(4)  | 3238(3)  | 5358(4) | 9439(1) | 50(1) |
| O(5)  | 5896(3)  | 1811(3) | 9287(1) | 45(1) |
| O(6)  | 9907(4)  | 5445(4) | 8003(1) | 60(1) |
| O(7)  | 10294(4) | -602(4) | 9247(1) | 75(1) |
| O(8)  | 3847(3)  | 1929(4) | 5638(1) | 59(1) |
| C(1)  | 8480(4)  | 2893(4) | 8601(1) | 35(1) |
| C(2)  | 6809(4)  | 3359(4) | 9031(1) | 36(1) |
| C(3)  | 5344(4)  | 4550(4) | 8584(1) | 38(1) |
| C(4)  | 8518(5)  | 4707(5) | 8219(1) | 43(1) |
| C(5)  | 4657(4)  | 6068(5) | 9031(1) | 44(1) |
| C(6)  | 6589(4)  | 6460(5) | 9452(1) | 44(1) |
| C(7)  | 8073(4)  | 1123(4) | 8154(1) | 36(1) |
| C(8)  | 10194(4) | 322(5)  | 8153(1) | 47(1) |
| C(9)  | 11074(4) | 696(5)  | 8841(2) | 46(1) |
| C(10) | 6934(4)  | 1402(4) | 7489(1) | 37(1) |
| C(11) | 7753(4)  | 2302(5) | 6976(1) | 46(1) |
| C(12) | 6683(5)  | 2455(5) | 6372(1) | 47(1) |
| C(13) | 4758(5)  | 1704(5) | 6262(1) | 45(1) |
| C(14) | 3913(4)  | 821(5)  | 6758(1) | 48(1) |
| C(15) | 5014(4)  | 679(5)  | 7366(1) | 43(1) |
| C(16) | 1898(5)  | 1172(6) | 5500(2) | 61(1) |
| C(17) | 1169(6)  | 1457(5) | 4788(1) | 55(1) |
| C(18) | 2398(6)  | 2139(6) | 4345(2) | 65(1) |
| C(19) | 1650(7)  | 2337(7) | 3691(2) | 76(1) |
| C(20) | -281(7)  | 1797(6) | 3492(2) | 73(1) |
| C(21) | -1490(7) | 1126(6) | 3929(2) | 75(1) |
| C(22) | -776(6)  | 965(6)  | 4578(2) | 66(1) |

**Table 3.** Bond lengths [Å] and angles [deg] for 12j.

---

|             |          |
|-------------|----------|
| O(1)-C(2)   | 1.425(3) |
| O(1)-C(6)   | 1.457(4) |
| O(2)-C(4)   | 1.366(4) |
| O(2)-C(3)   | 1.462(3) |
| O(3)-C(1)   | 1.424(3) |
| O(3)-C(9)   | 1.448(4) |
| O(4)-C(5)   | 1.426(4) |
| O(4)-H(4)   | 0.8400   |
| O(5)-C(2)   | 1.386(3) |
| O(5)-H(5)   | 0.8400   |
| O(6)-C(4)   | 1.193(4) |
| O(7)-C(9)   | 1.382(4) |
| O(7)-H(7)   | 0.8401   |
| O(8)-C(13)  | 1.379(3) |
| O(8)-C(16)  | 1.412(4) |
| C(1)-C(4)   | 1.510(4) |
| C(1)-C(2)   | 1.535(4) |
| C(1)-C(7)   | 1.565(4) |
| C(2)-C(3)   | 1.530(4) |
| C(3)-C(5)   | 1.520(4) |
| C(3)-H(3)   | 1.0000   |
| C(5)-C(6)   | 1.507(4) |
| C(5)-H(5A)  | 1.0000   |
| C(6)-H(6B)  | 0.9900   |
| C(6)-H(6A)  | 0.9900   |
| C(7)-C(10)  | 1.515(4) |
| C(7)-C(8)   | 1.528(4) |
| C(7)-H(7A)  | 1.0000   |
| C(8)-C(9)   | 1.508(4) |
| C(8)-H(8A)  | 0.9900   |
| C(8)-H(8B)  | 0.9900   |
| C(9)-H(9)   | 1.0000   |
| C(10)-C(15) | 1.382(4) |
| C(10)-C(11) | 1.398(4) |
| C(11)-C(12) | 1.380(4) |
| C(11)-H(11) | 0.9500   |
| C(12)-C(13) | 1.390(4) |
| C(12)-H(12) | 0.9500   |
| C(13)-C(14) | 1.373(4) |

|                  |          |
|------------------|----------|
| C(14)-C(15)      | 1.393(4) |
| C(14)-H(14)      | 0.9500   |
| C(15)-H(15)      | 0.9500   |
| C(16)-C(17)      | 1.517(4) |
| C(16)-H(16B)     | 0.9900   |
| C(16)-H(16A)     | 0.9900   |
| C(17)-C(22)      | 1.373(5) |
| C(17)-C(18)      | 1.381(5) |
| C(18)-C(19)      | 1.399(5) |
| C(18)-H(18)      | 0.9500   |
| C(19)-C(20)      | 1.369(6) |
| C(19)-H(19)      | 0.9500   |
| C(20)-C(21)      | 1.360(6) |
| C(20)-H(20)      | 0.9500   |
| C(21)-C(22)      | 1.382(5) |
| C(21)-H(21)      | 0.9500   |
| C(22)-H(22)      | 0.9500   |
|                  |          |
| C(2)-O(1)-C(6)   | 110.8(2) |
| C(4)-O(2)-C(3)   | 110.8(2) |
| C(1)-O(3)-C(9)   | 109.5(2) |
| C(5)-O(4)-H(4)   | 109.5    |
| C(2)-O(5)-H(5)   | 106.3    |
| C(9)-O(7)-H(7)   | 116.2    |
| C(13)-O(8)-C(16) | 117.0(2) |
| O(3)-C(1)-C(4)   | 110.4(2) |
| O(3)-C(1)-C(2)   | 112.7(2) |
| C(4)-C(1)-C(2)   | 100.0(2) |
| O(3)-C(1)-C(7)   | 106.4(2) |
| C(4)-C(1)-C(7)   | 112.5(2) |
| C(2)-C(1)-C(7)   | 115.0(2) |
| O(5)-C(2)-O(1)   | 111.7(2) |
| O(5)-C(2)-C(3)   | 112.7(2) |
| O(1)-C(2)-C(3)   | 104.5(2) |
| O(5)-C(2)-C(1)   | 115.3(2) |
| O(1)-C(2)-C(1)   | 108.5(2) |
| C(3)-C(2)-C(1)   | 103.2(2) |
| O(2)-C(3)-C(5)   | 107.2(2) |
| O(2)-C(3)-C(2)   | 103.6(2) |
| C(5)-C(3)-C(2)   | 103.7(2) |
| O(2)-C(3)-H(3)   | 113.8    |
| C(5)-C(3)-H(3)   | 113.8    |
| C(2)-C(3)-H(3)   | 113.8    |
| O(6)-C(4)-O(2)   | 122.3(3) |

|                   |          |
|-------------------|----------|
| O(6)-C(4)-C(1)    | 128.7(3) |
| O(2)-C(4)-C(1)    | 109.1(2) |
| O(4)-C(5)-C(6)    | 107.8(2) |
| O(4)-C(5)-C(3)    | 111.9(3) |
| C(6)-C(5)-C(3)    | 100.8(2) |
| O(4)-C(5)-H(5A)   | 111.9    |
| C(6)-C(5)-H(5A)   | 111.9    |
| C(3)-C(5)-H(5A)   | 111.9    |
| O(1)-C(6)-C(5)    | 104.8(2) |
| O(1)-C(6)-H(6B)   | 110.8    |
| C(5)-C(6)-H(6B)   | 110.8    |
| O(1)-C(6)-H(6A)   | 110.8    |
| C(5)-C(6)-H(6A)   | 110.8    |
| H(6B)-C(6)-H(6A)  | 108.9    |
| C(10)-C(7)-C(8)   | 115.3(2) |
| C(10)-C(7)-C(1)   | 118.2(2) |
| C(8)-C(7)-C(1)    | 101.1(2) |
| C(10)-C(7)-H(7A)  | 107.2    |
| C(8)-C(7)-H(7A)   | 107.2    |
| C(1)-C(7)-H(7A)   | 107.2    |
| C(9)-C(8)-C(7)    | 101.8(2) |
| C(9)-C(8)-H(8A)   | 111.4    |
| C(7)-C(8)-H(8A)   | 111.4    |
| C(9)-C(8)-H(8B)   | 111.4    |
| C(7)-C(8)-H(8B)   | 111.4    |
| H(8A)-C(8)-H(8B)  | 109.3    |
| O(7)-C(9)-O(3)    | 110.7(3) |
| O(7)-C(9)-C(8)    | 108.8(3) |
| O(3)-C(9)-C(8)    | 103.3(2) |
| O(7)-C(9)-H(9)    | 111.2    |
| O(3)-C(9)-H(9)    | 111.2    |
| C(8)-C(9)-H(9)    | 111.2    |
| C(15)-C(10)-C(11) | 117.3(2) |
| C(15)-C(10)-C(7)  | 119.3(2) |
| C(11)-C(10)-C(7)  | 123.3(2) |
| C(12)-C(11)-C(10) | 121.1(3) |
| C(12)-C(11)-H(11) | 119.4    |
| C(10)-C(11)-H(11) | 119.4    |
| C(11)-C(12)-C(13) | 120.2(3) |
| C(11)-C(12)-H(12) | 119.9    |
| C(13)-C(12)-H(12) | 119.9    |
| C(14)-C(13)-O(8)  | 125.2(3) |
| C(14)-C(13)-C(12) | 119.9(2) |
| O(8)-C(13)-C(12)  | 114.9(3) |

|                     |          |
|---------------------|----------|
| C(13)-C(14)-C(15)   | 119.2(3) |
| C(13)-C(14)-H(14)   | 120.4    |
| C(15)-C(14)-H(14)   | 120.4    |
| C(10)-C(15)-C(14)   | 122.3(3) |
| C(10)-C(15)-H(15)   | 118.9    |
| C(14)-C(15)-H(15)   | 118.9    |
| O(8)-C(16)-C(17)    | 110.0(3) |
| O(8)-C(16)-H(16B)   | 109.7    |
| C(17)-C(16)-H(16B)  | 109.7    |
| O(8)-C(16)-H(16A)   | 109.7    |
| C(17)-C(16)-H(16A)  | 109.7    |
| H(16B)-C(16)-H(16A) | 108.2    |
| C(22)-C(17)-C(18)   | 119.2(3) |
| C(22)-C(17)-C(16)   | 118.2(3) |
| C(18)-C(17)-C(16)   | 122.5(3) |
| C(17)-C(18)-C(19)   | 119.9(4) |
| C(17)-C(18)-H(18)   | 120.0    |
| C(19)-C(18)-H(18)   | 120.0    |
| C(20)-C(19)-C(18)   | 119.7(4) |
| C(20)-C(19)-H(19)   | 120.2    |
| C(18)-C(19)-H(19)   | 120.2    |
| C(21)-C(20)-C(19)   | 120.3(3) |
| C(21)-C(20)-H(20)   | 119.8    |
| C(19)-C(20)-H(20)   | 119.8    |
| C(20)-C(21)-C(22)   | 120.3(4) |
| C(20)-C(21)-H(21)   | 119.8    |
| C(22)-C(21)-H(21)   | 119.8    |
| C(17)-C(22)-C(21)   | 120.5(4) |
| C(17)-C(22)-H(22)   | 119.8    |
| C(21)-C(22)-H(22)   | 119.8    |

---

Symmetry transformations used to generate equivalent atoms:

**Table 4.** Anisotropic displacement parameters ( $\text{Å}^2 \times 10^3$ ) for 12j.

The anisotropic displacement factor exponent takes the form:

$$-2 \pi^2 [ h^2 a^{*2} U11 + \dots + 2 h k a^* b^* U12 ]$$

|       | U11    | U22   | U33   | U23    | U13    | U12    |
|-------|--------|-------|-------|--------|--------|--------|
| O(1)  | 48(1)  | 56(1) | 35(1) | -13(1) | -4(1)  | -1(1)  |
| O(2)  | 67(1)  | 42(1) | 34(1) | 5(1)   | 8(1)   | 5(1)   |
| O(3)  | 37(1)  | 49(1) | 45(1) | -7(1)  | -5(1)  | -4(1)  |
| O(4)  | 42(1)  | 60(2) | 50(1) | -11(1) | 5(1)   | -8(1)  |
| O(5)  | 44(1)  | 50(1) | 40(1) | 10(1)  | 5(1)   | -5(1)  |
| O(6)  | 79(2)  | 50(1) | 57(1) | -3(1)  | 31(1)  | -19(1) |
| O(7)  | 79(2)  | 75(2) | 62(2) | 31(2)  | -29(1) | -35(2) |
| O(8)  | 67(1)  | 70(2) | 36(1) | 6(1)   | -9(1)  | -8(1)  |
| C(1)  | 37(1)  | 38(2) | 29(1) | -1(1)  | -2(1)  | -4(1)  |
| C(2)  | 41(1)  | 42(2) | 26(1) | -1(1)  | 2(1)   | -5(1)  |
| C(3)  | 44(1)  | 40(2) | 30(1) | 1(1)   | -1(1)  | 0(1)   |
| C(4)  | 60(2)  | 40(2) | 31(1) | -5(1)  | 11(1)  | -6(2)  |
| C(5)  | 50(2)  | 42(2) | 38(1) | -4(1)  | 2(1)   | 3(1)   |
| C(6)  | 45(2)  | 44(2) | 45(2) | -10(1) | 9(1)   | -6(1)  |
| C(7)  | 41(1)  | 36(1) | 32(1) | -2(1)  | 3(1)   | -6(1)  |
| C(8)  | 48(2)  | 43(2) | 48(2) | -5(2)  | 1(1)   | 6(2)   |
| C(9)  | 41(2)  | 44(2) | 52(2) | 4(2)   | -5(1)  | -4(1)  |
| C(10) | 42(1)  | 38(2) | 32(1) | -2(1)  | 4(1)   | 0(1)   |
| C(11) | 49(2)  | 51(2) | 37(1) | 1(1)   | 5(1)   | -10(2) |
| C(12) | 59(2)  | 49(2) | 34(1) | 3(1)   | 7(1)   | -7(2)  |
| C(13) | 59(2)  | 46(2) | 30(1) | -1(1)  | -2(1)  | 0(2)   |
| C(14) | 45(2)  | 59(2) | 40(1) | 0(2)   | -1(1)  | -8(2)  |
| C(15) | 46(2)  | 48(2) | 36(1) | 1(1)   | 4(1)   | -7(1)  |
| C(16) | 77(2)  | 57(2) | 44(2) | 9(2)   | -12(2) | -13(2) |
| C(17) | 85(2)  | 42(2) | 35(1) | 2(2)   | -9(2)  | 2(2)   |
| C(18) | 81(2)  | 62(2) | 49(2) | -3(2)  | 1(2)   | 5(2)   |
| C(19) | 113(3) | 67(3) | 49(2) | 5(2)   | 17(2)  | 18(3)  |
| C(20) | 123(4) | 55(2) | 36(2) | -5(2)  | -11(2) | 21(2)  |
| C(21) | 105(3) | 53(2) | 60(2) | -3(2)  | -31(2) | -1(2)  |
| C(22) | 87(3)  | 51(2) | 57(2) | 7(2)   | -9(2)  | -10(2) |

**Table 5.** Hydrogen coordinates ( $\times 10^4$ ) and isotropic displacement parameters ( $\text{\AA}^2 \times 10^3$ ) for 12j.

|        | x     | y     | z    | U(eq) |
|--------|-------|-------|------|-------|
| H(4)   | 2314  | 4790  | 9212 | 76    |
| H(5)   | 6696  | 1422  | 9598 | 67    |
| H(7)   | 10880 | -682  | 9625 | 112   |
| H(3)   | 4216  | 3806  | 8353 | 46    |
| H(5A)  | 4143  | 7214  | 8784 | 52    |
| H(6B)  | 7424  | 7379  | 9239 | 53    |
| H(6A)  | 6312  | 6970  | 9879 | 53    |
| H(7A)  | 7288  | 204   | 8394 | 44    |
| H(8A)  | 10165 | -1046 | 8054 | 56    |
| H(8B)  | 10954 | 989   | 7836 | 56    |
| H(9)   | 12575 | 640   | 8882 | 56    |
| H(11)  | 9070  | 2818  | 7045 | 55    |
| H(12)  | 7263  | 3076  | 6029 | 57    |
| H(14)  | 2594  | 313   | 6688 | 58    |
| H(15)  | 4424  | 64    | 7707 | 52    |
| H(16B) | 966   | 1803  | 5773 | 73    |
| H(16A) | 1917  | -194  | 5604 | 73    |
| H(18)  | 3749  | 2474  | 4483 | 78    |
| H(19)  | 2478  | 2844  | 3388 | 91    |
| H(20)  | -778  | 1891  | 3046 | 87    |
| H(21)  | -2833 | 765   | 3787 | 90    |
| H(22)  | -1637 | 511   | 4880 | 79    |



**Table 6.** Torsion angles [deg] for 12j.

---

|                      |           |
|----------------------|-----------|
| C(9)-O(3)-C(1)-C(4)  | -128.5(2) |
| C(9)-O(3)-C(1)-C(2)  | 120.6(3)  |
| C(9)-O(3)-C(1)-C(7)  | -6.2(3)   |
| C(6)-O(1)-C(2)-O(5)  | -117.0(2) |
| C(6)-O(1)-C(2)-C(3)  | 5.2(3)    |
| C(6)-O(1)-C(2)-C(1)  | 114.8(2)  |
| O(3)-C(1)-C(2)-O(5)  | -84.0(3)  |
| C(4)-C(1)-C(2)-O(5)  | 158.9(2)  |
| C(7)-C(1)-C(2)-O(5)  | 38.2(3)   |
| O(3)-C(1)-C(2)-O(1)  | 42.2(3)   |
| C(4)-C(1)-C(2)-O(1)  | -74.9(2)  |
| C(7)-C(1)-C(2)-O(1)  | 164.4(2)  |
| O(3)-C(1)-C(2)-C(3)  | 152.7(2)  |
| C(4)-C(1)-C(2)-C(3)  | 35.5(3)   |
| C(7)-C(1)-C(2)-C(3)  | -85.2(3)  |
| C(4)-O(2)-C(3)-C(5)  | 119.7(2)  |
| C(4)-O(2)-C(3)-C(2)  | 10.4(3)   |
| O(5)-C(2)-C(3)-O(2)  | -154.2(2) |
| O(1)-C(2)-C(3)-O(2)  | 84.3(2)   |
| C(1)-C(2)-C(3)-O(2)  | -29.1(3)  |
| O(5)-C(2)-C(3)-C(5)  | 93.9(3)   |
| O(1)-C(2)-C(3)-C(5)  | -27.6(3)  |
| C(1)-C(2)-C(3)-C(5)  | -141.0(2) |
| C(3)-O(2)-C(4)-O(6)  | -166.3(3) |
| C(3)-O(2)-C(4)-C(1)  | 13.4(3)   |
| O(3)-C(1)-C(4)-O(6)  | 29.9(4)   |
| C(2)-C(1)-C(4)-O(6)  | 148.7(3)  |
| C(7)-C(1)-C(4)-O(6)  | -88.8(4)  |
| O(3)-C(1)-C(4)-O(2)  | -149.7(2) |
| C(2)-C(1)-C(4)-O(2)  | -30.8(3)  |
| C(7)-C(1)-C(4)-O(2)  | 91.6(3)   |
| O(2)-C(3)-C(5)-O(4)  | 174.7(2)  |
| C(2)-C(3)-C(5)-O(4)  | -76.1(3)  |
| O(2)-C(3)-C(5)-C(6)  | -71.0(3)  |
| C(2)-C(3)-C(5)-C(6)  | 38.3(3)   |
| C(2)-O(1)-C(6)-C(5)  | 19.4(3)   |
| O(4)-C(5)-C(6)-O(1)  | 82.1(3)   |
| C(3)-C(5)-C(6)-O(1)  | -35.3(3)  |
| O(3)-C(1)-C(7)-C(10) | -146.7(2) |
| C(4)-C(1)-C(7)-C(10) | -25.7(3)  |
| C(2)-C(1)-C(7)-C(10) | 87.9(3)   |

|                         |           |
|-------------------------|-----------|
| O(3)-C(1)-C(7)-C(8)     | -19.8(3)  |
| C(4)-C(1)-C(7)-C(8)     | 101.1(3)  |
| C(2)-C(1)-C(7)-C(8)     | -145.3(2) |
| C(10)-C(7)-C(8)-C(9)    | 165.8(3)  |
| C(1)-C(7)-C(8)-C(9)     | 37.1(3)   |
| C(1)-O(3)-C(9)-O(7)     | -85.9(3)  |
| C(1)-O(3)-C(9)-C(8)     | 30.4(3)   |
| C(7)-C(8)-C(9)-O(7)     | 75.7(3)   |
| C(7)-C(8)-C(9)-O(3)     | -42.0(3)  |
| C(8)-C(7)-C(10)-C(15)   | 129.2(3)  |
| C(1)-C(7)-C(10)-C(15)   | -111.0(3) |
| C(8)-C(7)-C(10)-C(11)   | -48.2(4)  |
| C(1)-C(7)-C(10)-C(11)   | 71.5(4)   |
| C(15)-C(10)-C(11)-C(12) | -0.1(5)   |
| C(7)-C(10)-C(11)-C(12)  | 177.4(3)  |
| C(10)-C(11)-C(12)-C(13) | -0.2(5)   |
| C(16)-O(8)-C(13)-C(14)  | -0.7(5)   |
| C(16)-O(8)-C(13)-C(12)  | 179.3(3)  |
| C(11)-C(12)-C(13)-C(14) | 0.6(5)    |
| C(11)-C(12)-C(13)-O(8)  | -179.4(3) |
| O(8)-C(13)-C(14)-C(15)  | 179.5(3)  |
| C(12)-C(13)-C(14)-C(15) | -0.5(5)   |
| C(11)-C(10)-C(15)-C(14) | 0.2(5)    |
| C(7)-C(10)-C(15)-C(14)  | -177.4(3) |
| C(13)-C(14)-C(15)-C(10) | 0.2(5)    |
| C(13)-O(8)-C(16)-C(17)  | -177.1(3) |
| O(8)-C(16)-C(17)-C(22)  | -174.0(3) |
| O(8)-C(16)-C(17)-C(18)  | 7.7(5)    |
| C(22)-C(17)-C(18)-C(19) | 0.6(6)    |
| C(16)-C(17)-C(18)-C(19) | 178.8(4)  |
| C(17)-C(18)-C(19)-C(20) | -2.0(6)   |
| C(18)-C(19)-C(20)-C(21) | 2.1(7)    |
| C(19)-C(20)-C(21)-C(22) | -0.7(7)   |
| C(18)-C(17)-C(22)-C(21) | 0.9(6)    |
| C(16)-C(17)-C(22)-C(21) | -177.4(4) |
| C(20)-C(21)-C(22)-C(17) | -0.8(6)   |

---

Symmetry transformations used to generate equivalent atoms:

Table 7. Hydrogen bonds for 12j [A and deg.].

---

| D-H...A | d(D-H) | d(H...A) | d(D...A) | <(DHA) |
|---------|--------|----------|----------|--------|
|---------|--------|----------|----------|--------|
